# Supplementary material for: Asymmetric organocatalytic multicomponent reactions for efficient construction of bicyclic compounds bearing bisacetal and isoxazolidine moieties
Source: Royal Society of Chemistry journal article supplement (doi:10.1039/d0cc05099g), 2020-01-01
Supplement: d0cc05099g1.pdf [file d0cc05099g1.pdf]

**Asymmetric Organocatalytic Multicomponent Reactions for  
Efficient Construction of Bicyclic Compounds Bearing  
Bisacetal and Isoxazolidine Moieties**

Jun-Ping Pei,<sup>a</sup> Xue-Jiao Lv,<sup>a</sup> Chen-Jun Peng<sup>a</sup> and Yan-Kai Liu<sup>\*ab</sup>

<sup>a</sup>Key Laboratory of Marine Drugs, Chinese Ministry of Education, School of Medicine and  
Pharmacy, Ocean University of China, Qingdao 266003, China

<sup>b</sup>Laboratory for Marine Drugs and Bioproducts of Qingdao National Laboratory for Marine  
Science and Technology, Qingdao 266003, China

E-mail: liuyankai@ouc.edu.cn

**Supporting Information**

## Contents

|                                                                                                  |    |
|--------------------------------------------------------------------------------------------------|----|
| A. General information .....                                                                     | 1  |
| B. The synthesis of the start materials .....                                                    | 3  |
| C. Optimization of the reaction conditions .....                                                 | 5  |
| C1. Optimization of the Michael Addition .....                                                   | 5  |
| C2. Optimization of the second step .....                                                        | 6  |
| D. One-pot synthesis of 5a .....                                                                 | 7  |
| E. Scope of the reaction .....                                                                   | 8  |
| F. Synthesis of Bicyclic 1,2-Oxazinane Derivatives .....                                         | 17 |
| G. Synthetic transformation .....                                                                | 19 |
| H. 1 mmol Scale synthesis of 5a .....                                                            | 21 |
| I. Control experiments .....                                                                     | 22 |
| I1. Control experiment 1: .....                                                                  | 22 |
| I2. Control experiment 2: .....                                                                  | 23 |
| I3. Control experiment 3: .....                                                                  | 24 |
| I4. Control experiment 4: .....                                                                  | 25 |
| I5. Control experiment 5: .....                                                                  | 26 |
| I6. Control experiment 6: .....                                                                  | 31 |
| J. Other reactions: .....                                                                        | 31 |
| J1. The reaction of <b>1a</b> with ( <i>E</i> )-4-oxo-4-phenylbut-2-enoic acid <b>15</b> : ..... | 31 |
| J2. The reaction of crotonaldehyde with benzyl hydroxyl carbamate and <b>2a</b> : .....          | 32 |
| K. NMR spectra and HPLC traces .....                                                             | 33 |
| L. Single crystal X-Ray diffraction data .....                                                   | 76 |

## A. General information

The  $^1\text{H}$  and  $^{13}\text{C}$  NMR spectra were recorded at 400/500 MHz for  $^1\text{H}$  and at 100/125 MHz for  $^{13}\text{C}$ . The chemical shifts ( $\delta$ ) for  $^1\text{H}$  and  $^{13}\text{C}$  are given in ppm relative to residual signals of the solvents ( $\text{CDCl}_3$  at 7.26 ppm  $^1\text{H}$  NMR, 77.16 ppm  $^{13}\text{C}$  NMR). Coupling constants are given in Hz. The following abbreviations are used to indicate the multiplicity: s, singlet; d, doublet; t, triplet; q, quartet; m, multiplet. High-resolution mass spectra (HRMS) were obtained from the Waters Q-ToF Ultima Global. LC-MS was performed using an Acquity UPLC H-Class coupled to a SQ Detector 2 mass spectrometer (Waters) using a BEH C18 column (1.7  $\mu\text{m}$ , 2.1  $\times$  50 mm). X-ray data were obtained from Zhongke chemical technology service center. Optical rotations are reported as follows:  $[\alpha]_D^{20}$  (c in g per 100 mL, solvent:  $\text{CHCl}_3$ ).

Note: NMR signals containing common solvent contaminants were list.  $\text{H}_2\text{O}$  in  $\text{CDCl}_3$  at 1.56 ppm  $^1\text{H}$  NMR; Ethyl acetate in  $\text{CDCl}_3$  at 2.05 (s), 4.12 (q), 1.26 (t) ppm  $^1\text{H}$  NMR; Dichloromethane in  $\text{CDCl}_3$  at 5.30 (s) ppm  $^1\text{H}$  NMR; Acetone in  $\text{CDCl}_3$  at 2.17 (s) ppm  $^1\text{H}$  NMR.

All the reactions were set up under air and using freshly distilled solvents, without any precautions to exclude moisture, unless otherwise noted open air chemistry on the bench-top. Chromatographic purification of products was accomplished using force-flow chromatography (FC) on silica gel (300-400 mesh). For thin layer chromatography (TLC) analysis throughout this work, Merck pre-coated TLC plates (silica gel 60 GF254, 0.25 mm) were used, using UV light as the visualizing agent and an phosphomolybdic acid or basic aqueous potassium permanganate ( $\text{KMnO}_4$ ) as stain developing solutions. Organic solutions were concentrated under reduced pressure on a Büchi rotary evaporator.

HPLC analyses on chiral stationary phase were performed on an Hitachi Chromaste. Daicel Chiralpak IA or IB columns with *n*-hexane/*i*-PrOH as the eluent were used. HPLC traces were compared to racemic samples which prepared by mixture of two enantiomeric final products obtained using (*S*) and (*R*) catalyst.

Commercial reagents and solvents were purchased from Sigma Aldrich, Fluka, and Alfa Aesar used as received, without further purification. All Michael acceptors **2** were

prepared according to literature procedures.<sup>[1]</sup> The lactols **1** was prepared according to literature procedures.<sup>[2]</sup> The 1,2-oxazinan-3-one **6** was prepared according to literature procedures.<sup>[3]</sup>

---

<sup>1</sup> Zhao, Y.-M.; Cheung, M. S.; Lin, Z.; Sun, J. Enantioselective synthesis of  $\beta,\gamma$ -unsaturated  $\alpha$ -fluoroesters catalyzed by N-heterocyclic carbenes. *Angew. Chem., Int. Ed.* **2012**, *51* (41), 10359-10363.

<sup>2</sup> Kobayashi, Y.; Taniguchi, Y.; Hayama, N.; Inokuma, T.; Takemoto, Y. A Powerful Hydrogen-Bond-Donating Organocatalyst for the Enantioselective Intramolecular Oxa-Michael Reaction of  $\alpha,\beta$ -Unsaturated Amides and Esters. *Angew. Chem., Int. Ed.* **2013**, *52* (42), 11114-11118.

<sup>3</sup> Wolfe, S.; Wilson, M.-C.; Cheng, M.-H.; Shustov, G. V.; Akuche, C. I. Cyclic hydroxamates, especially multiply substituted [1,2]oxazinan-3-ones. *Can. J. Chem.* **2003**, *81* (8), 937-960.

## B. The synthesis of the start materials

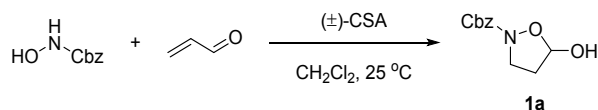

Acrolein (1.80 mL, 30.0 mmol) was added dropwise to a mixture of benzyl hydroxycarbamate (5.00 g, 29.9 mmol) and 10-camphorsulfonic acid (1.40 g, 6.03 mmol) in dichloromethane (150 mL), and the mixture was stirred at room temperature for 20 min. The reaction mixture was then diluted with CHCl<sub>3</sub> (100 mL) and washed with saturated aqueous NaHCO<sub>3</sub> solution (100 mL x 2). The organic layer was dried over Na<sub>2</sub>SO<sub>4</sub>, filtered, and concentrated in vacuo. The residue was purified by recrystallization (from petroleum ether/ethyl acetate) to afford benzyl 5-hydroxyisoxazolidine-2-carboxylate **1a** as white solid (4.79 g, 72%).

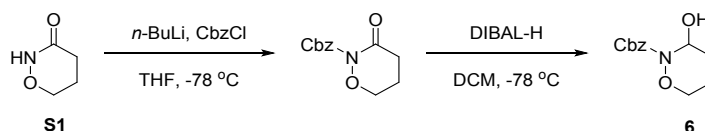

To a stirred solution of 1,2-oxazin-3-one (120 mg, 1.19 mmol) in THF (2.5 mL) was added *n*-BuLi (2.5 M solution in hexane, 0.48 mL) at -78 °C. After being stirred at the same temperature for 30 min, benzyl carbonochloridate (243 mg, 1.42 mmol) was added. The reaction mixture was stirred for 1 h and gradually warmed to rt, after which it was quenched with satd aq. NH<sub>4</sub>Cl (10 mL) at 0 °C and warmed to rt. The water layer was extracted with EtOAc (3 x 10 mL) and the combined organic layers were dried over Na<sub>2</sub>SO<sub>4</sub> and the solvent was evaporated. The product was purified by column chromatography on a silica gel (petroleum ether/ethyl acetate = 3/1) to afford the product a colorless oil (135 mg, 49%).

To a stirred solution of benzyl 3-oxo-1,2-oxazinane-2-carboxylate (70.5 mg, 0.30 mmol) in CH<sub>2</sub>Cl<sub>2</sub> (1.5 mL) was added DIBAL-H (1.5 M solution in toluene, 0.36 mL) at -78 °C. After being stirred at the same temperature for 1 h, the reaction mixture was quenched with MeOH and a saturated potassium sodium tartrate solution, and the reaction mixture was warmed up to room temperature. The organic layer was separated and the

aqueous layer was extracted with  $\text{CH}_2\text{Cl}_2$  twice. The combined organic extracts were washed with brine and dried over  $\text{Na}_2\text{SO}_4$  and the solvent was evaporated. The product was purified by column chromatography on a silica gel (petroleum ether/ethyl acetate = 3/1) to afford the product **6** a colorless oil (46 mg, 65%)

## C1. Optimization of the Michael Addition

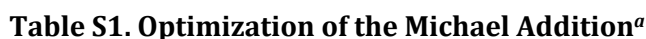

[a] Unless otherwise specified, all reactions were carried out using **1a** (0.10 mmol, 1.0 equiv), **2a** (0.13 mmol, 1.3 equiv) in solvent (0.3 mL) with **3** (20 mol %) and **acid** (20 mol %) at 40 °C. After workup, the mixture was purified by flash chromatography on silica gel to afford **4a/4a'**. Compound **4a/4a'** was dissolved in redistilled CH<sub>2</sub>Cl<sub>2</sub> (0.1 mmol in 1 mL) at 0 °C, and CSA (20 mol %) was added. After full conversion of the second step, the residue was purified by flash chromatography on gel to give product **5a**. [b] Isolated yield of **5a** over two steps. [c] Determined by HPLC analyses of isolated compound **5a** on chiral stationary phases. TMS = Trimethylsilyl. TBS = *tert*-Butyldimethylsilyl. MTBE = *tert*-Butyl methyl

ether. CSA = Camphorsulfonic acid.



## C2. Optimization of the second step

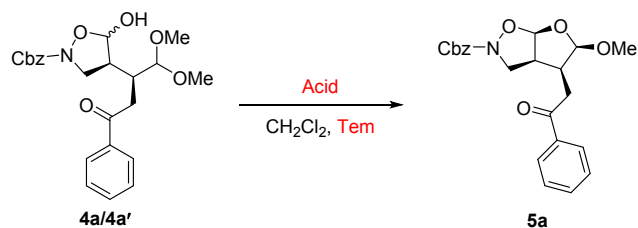

**Table S2. Optimization of the second step<sup>a</sup>**

| Entry | Acid                                          | Tem (°C) | Yield (%) <sup>b</sup> | ee (%) <sup>c</sup> |
|-------|-----------------------------------------------|----------|------------------------|---------------------|
| 1     | BF <sub>3</sub> ·Et <sub>2</sub> O (20 mol %) | 0        | 51                     | 97                  |
| 2     | Trifluoroacetic acid (20 mol %)               | 0        | 25                     | 97                  |
| 3     | Diphenylphosphate (20 mol %)                  | 0        | -                      | -                   |
| 4     | Diphenylphosphate (20 mol %)                  | 25       | 46                     | 97                  |
| 5     | CSA (20 mol %)                                | 0        | 80                     | 97                  |
| 6     | <i>p</i> -TsOH (20 mol %)                     | 0        | 46                     | 97                  |
| 7     | CSA (20 mol %)                                | 25       | 77                     | 97                  |
| 8     | CSA (20 mol %)                                | 40       | 66                     | 97                  |
| 9     | CSA (20 mol %) + 4Å MS                        | 0        | -                      | -                   |

[a] Unless otherwise specified, all reactions were carried out using **4a/4a'** (0.05 mmol, 1.0 equiv) in redistilled CH<sub>2</sub>Cl<sub>2</sub> (0.3 mL) with acid. After workup, the mixture was purified by flash chromatography on silica gel to afford **5a**. [b] Isolated yield of **5a**. [c] Determined by HPLC analyses of isolated compound **5a** on chiral stationary phases. *p*-TsOH = *p*-Toluenesulfonic acid. CSA = Camphorsulfonic acid.

## D. One-pot synthesis of **5a**

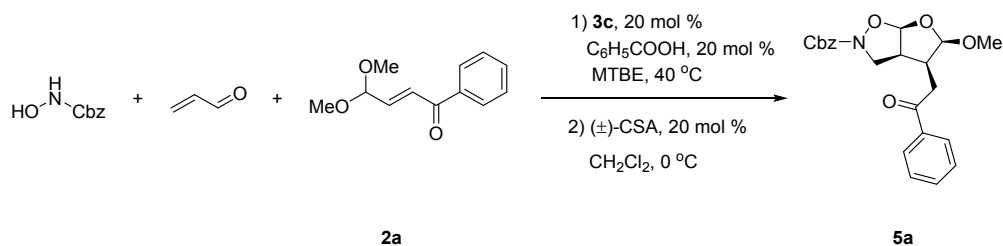

A glass vial equipped with a magnetic stirring bar was charged with benzyl hydroxycarbamate (16.7 mg, 0.10 mmol, 1.0 equiv), acrylaldehyde (8.4 mg, 0.18 mmol, 1.8 equiv), **2a** (26.8 mg, 0.13 mmol, 1.3 equiv), **3c** (7.4 mg, 0.02 mmol, 0.2 equiv) and C<sub>6</sub>H<sub>5</sub>COOH (2.5 mg, 0.02 mmol, 0.2 equiv) in MTBE (0.3 mL) at 40 °C. The reaction was stirred at 40 °C for 72 h until the consumption of benzyl hydroxycarbamate (monitored by TLC analysis). After completion of the reaction, the reaction mixture was concentrated and the residue was purified by flash chromatography on silica gel (petroleum ether/ethyl acetate = 2:1) to afford **4a/4a'** colorless oil (36 mg). Then, compound **4a/4a'** (36 mg, 1.0 equiv) was dissolved in anhydrous CH<sub>2</sub>Cl<sub>2</sub> (0.5 mL) at 0 °C. CSA (3.89 mg, 0.2 equiv) was added to the reaction mixtures. The reaction was stirred at 0 °C for 12 h until the consumption of **4a/4a'**, then the reaction mixture was concentrated and the residue was purified by flash chromatography on silica gel (petroleum ether/ethyl acetate = 5:2) to give product **5a** (25 mg, 63% over two steps, >99% ee, dr >20:1 ).

## E. Scope of the reaction

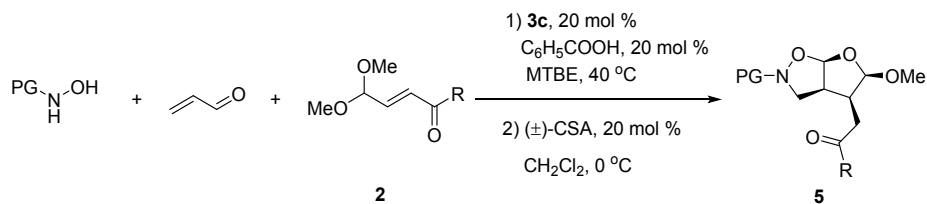

**General procedure:** A glass vial equipped with a magnetic stirring bar was charged with N-protected hydroxylamine (0.10 mmol, 1.0 equiv), acrylaldehyde (0.18 mmol, 1.8 equiv), **2** (0.13 mmol, 1.3 equiv), **3c** (0.02 mmol, 0.2 equiv) and  $\text{C}_6\text{H}_5\text{COOH}$  (0.02 mmol, 0.2 equiv) in MTBE (0.3 mL) at 40 °C. The resulting reaction mixture was kept under vigorous stirring until the consumption of N-protected hydroxylamine (monitored by TLC analysis). After completion of the reaction, the reaction mixture was concentrated and the residue was purified by flash chromatography on silica gel (petroleum ether/ethyl acetate = 6:1 to 2:1) to afford **4/4'**. Then, compound **4/4'** (1.0 equiv) was dissolved in anhydrous  $\text{CH}_2\text{Cl}_2$  (0.10 mmol in 0.6 mL) at 0 °C. CSA (0.2 equiv) was added to the reaction mixtures. After full conversion of the second step, the reaction mixture was concentrated and the residue was purified by flash chromatography on silica gel (petroleum ether/ethyl acetate = 11:2 to 5:2) to give product **5** for NMR and HPLC analysis.

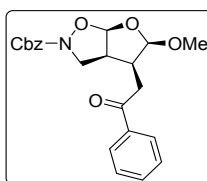

benzyl (3a*S*,4*S*,5*R*,6a*R*)-5-methoxy-4-(2-oxo-2-phenylethyl)tetrahydrofuro[3,2-*d'*]isoxazole-2(3*H*)-carboxylate (**5a**)

**5a** was obtained as a colorless oil 24 mg in 61% yield for two steps after column chromatography on silica gel (petroleum ether/ethyl acetate = 7/2). **<sup>1</sup>H NMR** (400 MHz,  $\text{CDCl}_3$ )  $\delta$  7.96 (d,  $J$  = 7.7 Hz, 2H), 7.60 (t,  $J$  = 7.4 Hz, 1H), 7.48 (t,  $J$  = 7.7 Hz, 2H), 7.39 (t,  $J$  = 10.1 Hz, 2H), 7.37 – 7.28 (m, 3H), 5.98 (d,  $J$  = 5.2 Hz, 1H), 5.32 – 5.24 (m, 1H), 5.12 (d,  $J$  = 12.3 Hz, 1H), 5.01 (d,  $J$  = 5.1 Hz, 1H), 4.13 (d,  $J$  = 10.8 Hz, 1H), 3.46 – 3.33 (m, 3H), 3.28 – 3.17 (m, 4H), 2.88 (dt,  $J$  = 14.8, 7.4 Hz, 1H) ppm. **<sup>13</sup>C NMR** (125 MHz,  $\text{CDCl}_3$ )  $\delta$  198.1, 156.8, 136.6, 136.1, 133.6, 128.9, 128.7, 128.4, 128.3, 128.2, 109.2, 105.9, 67.9, 56.3, 48.1,

46.7, 40.2, 35.6 ppm. **HRMS**:  $[M+H]^+$  *calcd.* For  $C_{22}H_{24}NO_6^+$  398.1598, found 398.1595.  $[\alpha]_D^{20}$  45.21 ( $c = 0.49$  in  $CHCl_3$ ). The enantiomeric excess was determined by HPLC analysis on Daicel Chiralpak IB column [ $n$ -hexane/ $i$ -PrOH = 80/20, 1 mL/min],  $\lambda = 210$  nm,  $t_{major} = 22.59$  min,  $t_{minor} = 18.13$  min, **ee** >99%. The diastereomeric ratio was determined by NMR **dr** >20:1.

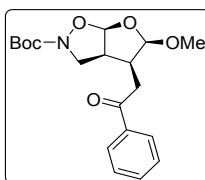

**tert-butyl (3aS,4S,5R,6aR)-5-methoxy-4-(2-oxo-2-phenylethyl)tetrahydrofuro[3,2-d]isoxazole-2(3H)-carboxylate (5b)**

**5b** was obtained as a white solid 19 mg in 52% yield for two steps after column chromatography on silica gel (petroleum ether/ethyl acetate = 9/2).  **$^1H$  NMR** (500 MHz,  $CDCl_3$ )  $\delta$  8.04 – 7.94 (m, 2H), 7.59 (t,  $J = 7.4$  Hz, 1H), 7.49 (t,  $J = 7.7$  Hz, 2H), 5.94 (d,  $J = 4.7$  Hz, 1H), 5.03 (d,  $J = 5.0$  Hz, 1H), 4.02 – 3.92 (m, 1H), 3.44 – 3.36 (m, 3H), 3.32 (s, 3H), 3.21 (dd,  $J = 18.3, 7.2$  Hz, 1H), 2.87 (dt,  $J = 14.4, 7.2$  Hz, 1H), 1.50 (s, 9H) ppm.  **$^{13}C$  NMR** (125 MHz,  $CDCl_3$ )  $\delta$  198.1, 155.3, 136.5, 133.4, 128.7, 128.0, 108.7, 105.8, 81.4, 56.2, 47.8, 46.5, 40.0, 35.3, 28.4 ppm. **HRMS**:  $[M+Na]^+$  *calcd.* For  $C_{19}H_{25}NNaO_6^+$  386.1574, found 386.1578.  $[\alpha]_D^{20}$  12.75 ( $c = 1.08$  in  $CHCl_3$ ). The enantiomeric excess was determined by HPLC analysis on Daicel Chiralpak IA column [ $n$ -hexane/ $i$ -PrOH = 80/20, 1 mL/min],  $\lambda = 210$  nm,  $t_{major} = 8.17$  min,  $t_{minor} = 7.05$  min, **ee** = 97%. The diastereomeric ratio was determined by NMR **dr** >20:1.

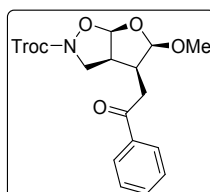

**2,2,2-trichloroethyl (3aS,4S,5R,6aR)-5-methoxy-4-(2-oxo-2-phenylethyl)tetrahydrofuro[3,2-d]isoxazole-2(3H)-carboxylate (5c)**

**5c** was obtained as a yellow oil 22 mg in 50% yield for two steps after column chromatography on silica gel (petroleum ether/ethyl acetate = 11/2).  **$^1H$  NMR** (400 MHz,  $CDCl_3$ )  $\delta$  8.01 – 7.95 (m, 2H), 7.60 (t,  $J = 7.4$  Hz, 1H), 7.49 (t,  $J = 7.7$  Hz, 2H), 6.02 (d,  $J = 4.9$  Hz, 1H), 5.03 (d,  $J = 5.1$  Hz, 1H), 4.89 – 4.78 (m, 1H), 4.66 (s, 1H), 4.14 (d,  $J = 9.1$  Hz, 1H), 3.47 (ddd,  $J = 8.6, 6.0, 2.5$  Hz, 2H), 3.40 (dd,  $J = 18.4, 7.3$  Hz, 1H), 3.31 – 3.21 (m, 4H), 2.93

– 2.83 (m, 1H) ppm.  $^{13}\text{C}$  NMR (125 MHz,  $\text{CDCl}_3$ )  $\delta$  198.0, 136.5, 133.7, 128.9, 128.1, 110.1, 109.3, 105.9, 75.7, 47.9, 46.8, 40.1, 35.5, 29.8 ppm. HRMS:  $[\text{M}+\text{Na}]^+$  *calcd.* For  $\text{C}_{17}\text{H}_{18}\text{Cl}_3\text{NNaO}_6^+$  460.0092, found 460.0095.  $[\alpha]_{\text{D}}^{20}$  22.42 ( $c = 0.97$  in  $\text{CHCl}_3$ ). The enantiomeric excess was determined by HPLC analysis on Daicel Chiralpak IA column [ $n$ -hexane/ $i$ -PrOH = 80/20, 1 mL/min],  $\lambda = 210$  nm,  $t_{\text{major}} = 10.90$  min,  $t_{\text{minor}} = 9.55$  min, **ee** = **98%**. The diastereomeric ratio was determined by NMR **dr** >**20:1**.

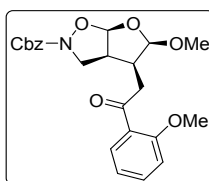

benzyl (3aS,4S,5R,6aR)-5-methoxy-4-(2-(2-methoxyphenyl)-2-oxoethyl)tetrahydrofuro[3,2-*d*]isoxazole-2(3*H*)-carboxylate (**5d**)

**5d** was obtained as a colorless oil 20 mg in 47% yield for two steps after column chromatography on silica gel (petroleum ether/ethyl acetate = 3/1).  $^1\text{H}$  NMR (500 MHz,  $\text{CDCl}_3$ )  $\delta$  7.67 (dd,  $J = 7.7, 1.7$  Hz, 1H), 7.52 – 7.46 (m, 1H), 7.39 (d,  $J = 6.3$  Hz, 2H), 7.34 – 7.28 (m, 3H), 7.04 – 6.93 (m, 2H), 5.95 (d,  $J = 4.7$  Hz, 1H), 5.26 (d,  $J = 12.3$  Hz, 1H), 5.12 (d,  $J = 12.3$  Hz, 1H), 4.98 (d,  $J = 5.0$  Hz, 1H), 4.22 – 4.12 (m, 1H), 3.86 (s, 3H), 3.40 – 3.35 (m, 2H), 3.32 (d,  $J = 7.3$  Hz, 2H), 3.22 (s, 3H), 2.88 – 2.79 (m, 1H) ppm.  $^{13}\text{C}$  NMR (125 MHz,  $\text{CDCl}_3$ )  $\delta$  200.3, 158.7, 136.1, 133.9, 130.2, 128.6, 128.3, 128.2, 127.8, 120.8, 111.7, 109.0, 106.1, 67.8, 56.2, 55.7, 48.1, 46.7, 40.6, 40.5 ppm. HRMS:  $[\text{M}+\text{H}]^+$  *calcd.* For  $\text{C}_{23}\text{H}_{26}\text{NO}_7^+$  428.1704, found 428.1709.  $[\alpha]_{\text{D}}^{20}$  49.22 ( $c = 1.28$  in  $\text{CHCl}_3$ ). The enantiomeric excess was determined by HPLC analysis on Daicel Chiralpak IB column [ $n$ -hexane/ $i$ -PrOH = 80/20, 1 mL/min],  $\lambda = 210$  nm,  $t_{\text{major}} = 24.46$  min,  $t_{\text{minor}} = 21.18$  min, **ee** = **99%**. The diastereomeric ratio was determined by NMR **dr** >**20:1**.

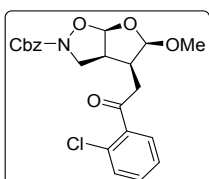

benzyl (3aS,4S,5R,6aR)-4-(2-(2-chlorophenyl)-2-oxoethyl)-5-methoxytetrahydrofuro[3,2-*d*]isoxazole-2(3*H*)-carboxylate (**5e**)

**5e** was obtained as a colorless oil 18 mg in 42% yield for two steps after column chromatography on silica gel (petroleum ether/ethyl acetate = 7/2). **<sup>1</sup>H NMR** (400 MHz, CDCl<sub>3</sub>) δ 7.48 – 7.29 (m, 9H), 5.97 (d, *J* = 4.8 Hz, 1H), 5.26 (d, *J* = 12.3 Hz, 1H), 5.12 (d, *J* = 12.3 Hz, 1H), 4.99 (d, *J* = 5.0 Hz, 1H), 4.19 – 4.07 (m, 1H), 3.42 – 3.28 (m, 3H), 3.27 – 3.14 (m, 4H), 2.93 – 2.78 (m, 1H) ppm. **<sup>13</sup>C NMR** (125 MHz, CDCl<sub>3</sub>) δ 201.2, 138.9, 136.1, 132.2, 130.9, 128.8, 128.6, 128.3, 128.3, 127.2, 109.1, 105.7, 67.9, 56.3, 48.0, 46.7, 40.3, 40.0 ppm. **HRMS**: [M+Na]<sup>+</sup> *calcd.* For C<sub>22</sub>H<sub>22</sub>ClNNaO<sub>6</sub><sup>+</sup> 454.1028, found 454.1029. [α]<sub>D</sub><sup>20</sup> 17.97 (*c* = 0.63 in CHCl<sub>3</sub>). The enantiomeric excess was determined by HPLC analysis on Daicel Chiralpak IB column [*n*-hexane/*i*-PrOH = 80/20, 1 mL/min], λ = 210 nm, *t*<sub>major</sub> = 25.61 min, *t*<sub>minor</sub> = 20.93 min, **ee** = **90%**. The diastereomeric ratio was determined by NMR **dr** **>20:1**.

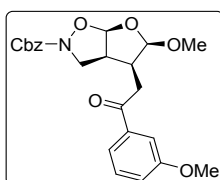

benzyl (3aS,4S,5R,6aR)-5-methoxy-4-(2-(3-methoxyphenyl)-2-oxoethyl)tetrahydrofuro[3,2-*d*]isoxazole-2(3H)-carboxylate (**5f**)

**5f** was obtained as a colorless oil 24 mg in 56% yield for two steps after column chromatography on silica gel (petroleum ether/ethyl acetate = 7/2). **<sup>1</sup>H NMR** (400 MHz, CDCl<sub>3</sub>) δ 7.54 (d, *J* = 7.8 Hz, 1H), 7.48 (dd, *J* = 2.6, 1.6 Hz, 1H), 7.44 – 7.27 (m, 6H), 7.14 (ddd, *J* = 8.2, 2.7, 0.9 Hz, 1H), 5.98 (d, *J* = 5.1 Hz, 1H), 5.27 (d, *J* = 12.3 Hz, 1H), 5.12 (d, *J* = 12.3 Hz, 1H), 5.01 (d, *J* = 5.1 Hz, 1H), 4.16 – 4.09 (m, 1H), 3.86 (s, 3H), 3.46 – 3.32 (m, 3H), 3.28 – 3.16 (m, 4H), 2.86 (qd, *J* = 7.4, 5.1 Hz, 1H) ppm. **<sup>13</sup>C NMR** (125 MHz, CDCl<sub>3</sub>) δ 197.9, 160.0, 137.9, 136.1, 129.9, 128.6, 128.3, 128.3, 120.9, 120.0, 112.4, 109.1, 105.9, 67.9, 56.3, 55.6, 48.1, 46.7, 40.2, 35.7 ppm. **HRMS**: [M+H]<sup>+</sup> *calcd.* For C<sub>23</sub>H<sub>26</sub>NO<sub>7</sub><sup>+</sup> 428.1704, found 428.1706. [α]<sub>D</sub><sup>20</sup> 52.70 (*c* = 1.17 in CHCl<sub>3</sub>). The enantiomeric excess was determined by HPLC analysis on Daicel Chiralpak IB column [*n*-hexane/*i*-PrOH = 80/20, 1 mL/min], λ = 210 nm, *t*<sub>major</sub> = 26.62 min, *t*<sub>minor</sub> = 23.52 min, **ee** = **99%**. The diastereomeric ratio was determined by NMR **dr** **>20:1**.

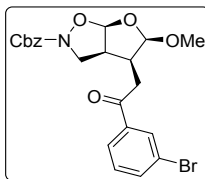

benzyl (3aS,4S,5R,6aR)-4-(2-(3-bromophenyl)-2-oxoethyl)-5-methoxytetrahydrofuro[3,2-d]isoxazole-2(3H)-carboxylate (**5g**)

**5g** was obtained as a colorless oil 28 mg in 59% yield for two steps after column chromatography on silica gel (petroleum ether/ethyl acetate = 7/2). **<sup>1</sup>H NMR** (500 MHz, CDCl<sub>3</sub>) δ 8.10 (t, *J* = 1.8 Hz, 1H), 7.89 (dt, *J* = 7.8, 1.4 Hz, 1H), 7.73 (ddd, *J* = 7.9, 2.0, 1.1 Hz, 1H), 7.45 – 7.29 (m, 6H), 5.99 (d, *J* = 5.2 Hz, 1H), 5.29 (d, *J* = 12.3 Hz, 1H), 5.13 (d, *J* = 12.3 Hz, 1H), 5.01 (d, *J* = 5.0 Hz, 1H), 4.15 – 4.09 (m, 1H), 3.45 – 3.34 (m, 3H), 3.24 (s, 3H), 3.19 (dd, *J* = 18.4, 7.0 Hz, 1H), 2.90 – 2.81 (m, 1H) ppm. **<sup>13</sup>C NMR** (125 MHz, CDCl<sub>3</sub>) δ 196.7, 138.2, 136.5, 136.0, 131.2, 130.5, 128.7, 128.4, 128.3, 126.7, 123.2, 109.2, 105.8, 67.9, 56.3, 48.0, 46.6, 40.0, 35.8 ppm. **HRMS**: [M+H]<sup>+</sup> *calcd.* For C<sub>22</sub>H<sub>23</sub>BrNO<sub>6</sub><sup>+</sup> 476.0703, found 476.0700. [α]<sub>D</sub><sup>20</sup> 29.86 (*c* = 1.22 in CHCl<sub>3</sub>). The enantiomeric excess was determined by HPLC analysis on Daicel Chiralpak IB column [*n*-hexane/*i*-PrOH = 80/20, 1 mL/min], λ = 210 nm, *t*<sub>major</sub> = 23.64 min, *t*<sub>minor</sub> = 18.79 min, **ee** = **99%**. The diastereomeric ratio was determined by NMR **dr** >**20:1**.

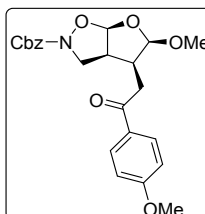

benzyl (3aS,4S,5R,6aR)-5-methoxy-4-(2-(4-methoxyphenyl)-2-oxoethyl)tetrahydrofuro[3,2-d]isoxazole-2(3H)-carboxylate (**5h**)

**5h** was obtained as a colorless oil 26 mg in 61% yield for two steps after column chromatography on silica gel (petroleum ether/ethyl acetate = 3/1). **<sup>1</sup>H NMR** (400 MHz, CDCl<sub>3</sub>) δ 7.98 – 7.90 (m, 2H), 7.44 – 7.38 (m, 2H), 7.38 – 7.29 (m, 3H), 6.96 – 6.90 (m, 2H), 5.97 (d, *J* = 5.1 Hz, 1H), 5.28 (d, *J* = 12.3 Hz, 1H), 5.12 (d, *J* = 12.3 Hz, 1H), 4.99 (d, *J* = 5.0 Hz, 1H), 4.12 (dd, *J* = 10.8, 2.1 Hz, 1H), 3.88 (s, 3H), 3.45 – 3.26 (m, 3H), 3.26 – 3.12 (m, 4H), 2.86 (qd, *J* = 7.3, 4.9 Hz, 1H) ppm. **<sup>13</sup>C NMR** (125 MHz, CDCl<sub>3</sub>) δ 196.6, 163.9, 136.1, 130.5, 129.6, 128.6, 128.3, 128.3, 113.9, 109.2, 106.0, 67.8, 56.2, 55.6, 48.1, 46.6, 40.2,

35.1 ppm. **HRMS**:  $[M+H]^+$  *calcd.* For  $C_{23}H_{26}NO_7^+$  428.1704, found 428.1702.  $[\alpha]_D^{20}$  61.86 ( $c = 1.45$  in  $CHCl_3$ ). The enantiomeric excess was determined by HPLC analysis on Daicel Chiralpak IA column [ $n$ -hexane/ $i$ -PrOH = 80/20, 1 mL/min],  $\lambda = 260$  nm,  $t_{major} = 22.66$  min,  $t_{minor} = 17.93$  min, **ee** = **99%**. The diastereomeric ratio was determined by NMR **dr** **>20:1**.

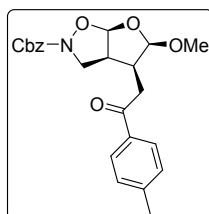

benzyl (3a*S*,4*S*,5*R*,6a*R*)-5-methoxy-4-(2-oxo-2-(*p*-tolyl)ethyl)tetrahydrofuro[3,2-*d*]isoxazole-2(3*H*)-carboxylate (**5i**)

**5i** was obtained as a colorless oil 24 mg in 58% yield for two steps after column chromatography on silica gel (petroleum ether/ethyl acetate = 4/1). **<sup>1</sup>H NMR** (400 MHz,  $CDCl_3$ )  $\delta$  7.90 – 7.82 (m, 2H), 7.43 – 7.38 (m, 2H), 7.37 – 7.30 (m, 3H), 7.27 (d,  $J = 8.2$  Hz, 2H), 5.97 (d,  $J = 5.1$  Hz, 1H), 5.33 – 5.23 (m, 1H), 5.12 (d,  $J = 12.3$  Hz, 1H), 5.00 (d,  $J = 5.0$  Hz, 1H), 4.13 (dd,  $J = 10.7, 2.2$  Hz, 1H), 3.47 – 3.30 (m, 3H), 3.23 (s, 4H), 2.87 (qd,  $J = 7.3, 4.8$  Hz, 1H), 2.43 (s, 3H) ppm. **<sup>13</sup>C NMR** (125 MHz,  $CDCl_3$ )  $\delta$  197.7, 156.8, 144.5, 136.1, 134.1, 129.5, 128.6, 128.3, 128.3, 109.2, 106.0, 67.8, 56.2, 48.1, 46.6, 40.2, 35.4, 21.8 ppm. **HRMS**:  $[M+H]^+$  *calcd.* For  $C_{23}H_{26}NO_6^+$  412.1755, found 412.1756.  $[\alpha]_D^{20}$  50.72 ( $c = 1.35$  in  $CHCl_3$ ). The enantiomeric excess was determined by HPLC analysis on Daicel Chiralpak IB column [ $n$ -hexane/ $i$ -PrOH = 80/20, 1 mL/min],  $\lambda = 210$  nm,  $t_{major} = 20.11$  min,  $t_{minor} = 18.58$  min, **ee** **>99%**. The diastereomeric ratio was determined by NMR **dr** **>20:1**.

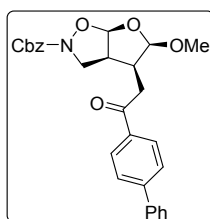

benzyl (3a*S*,4*S*,5*R*,6a*R*)-4-(2-([1,1'-biphenyl]-4-yl)-2-oxoethyl)-5-methoxytetrahydrofuro[3,2-*d*]isoxazole-2(3*H*)-carboxylate (**5j**)

**5j** was obtained as a colorless oil 24 mg in 51% yield for two steps after column chromatography on silica gel (petroleum ether/ethyl acetate = 7/2). **<sup>1</sup>H NMR** (400 MHz,  $CDCl_3$ )  $\delta$  8.08 – 8.00 (m, 2H), 7.73 – 7.67 (m, 2H), 7.67 – 7.61 (m, 2H), 7.53 – 7.46 (m, 2H),



7.42 (ddd,  $J = 8.0, 4.2, 1.5$  Hz, 3H), 7.38 – 7.28 (m, 3H), 5.99 (d,  $J = 5.1$  Hz, 1H), 5.29 (d,  $J = 12.3$  Hz, 1H), 5.13 (d,  $J = 12.3$  Hz, 1H), 5.03 (d,  $J = 5.0$  Hz, 1H), 4.15 (dd,  $J = 10.7, 2.1$  Hz, 1H), 3.51 – 3.32 (m, 3H), 3.32 – 3.13 (m, 4H), 2.90 (qd,  $J = 7.3, 4.9$  Hz, 1H) ppm.  $^{13}\text{C}$  NMR (125 MHz,  $\text{CDCl}_3$ )  $\delta$  197.6, 156.8, 146.3, 139.8, 136.1, 135.2, 129.1, 128.8, 128.6, 128.5, 128.3, 128.3, 127.4, 127.4, 109.2, 105.9, 67.9, 56.3, 48.1, 46.7, 40.2, 35.6 ppm. **HRMS**:  $[\text{M}+\text{H}]^+$  *calcd.* For  $\text{C}_{28}\text{H}_{28}\text{NO}_6^+$  474.1911, found 474.1915.  $[\alpha]_{\text{D}}^{20}$  54.98 ( $c = 1.63$  in  $\text{CHCl}_3$ ). The enantiomeric excess was determined by HPLC analysis on Daicel Chiralpak IB column [*n*-hexane/*i*-PrOH = 80/20, 1 mL/min],  $\lambda = 210$  nm,  $t_{\text{major}} = 30.46$  min,  $t_{\text{minor}} = 33.91$  min, **ee** >99%. The diastereomeric ratio was determined by NMR **dr** >20:1.

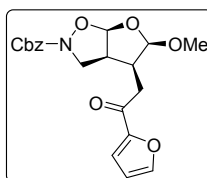

benzyl (3aS,4S,5R,6aR)-4-(2-(furan-2-yl)-2-oxoethyl)-5-methoxytetrahydrofuro[3,2-*d*]isoxazole-2(3H)-carboxylate (**5k**)

**5k** was obtained as a colorless oil 24 mg in 62% yield for two steps after column chromatography on silica gel (petroleum ether/ethyl acetate = 5/2).  $^1\text{H}$  NMR (400 MHz,  $\text{CDCl}_3$ )  $\delta$  7.59 (d,  $J = 1.7$  Hz, 1H), 7.44 – 7.38 (m, 2H), 7.38 – 7.28 (m, 3H), 7.19 (d,  $J = 3.6$  Hz, 1H), 6.55 (dd,  $J = 3.6, 1.7$  Hz, 1H), 5.95 (d,  $J = 4.4$  Hz, 1H), 5.27 (d,  $J = 12.3$  Hz, 1H), 5.12 (d,  $J = 12.3$  Hz, 1H), 4.97 (d,  $J = 5.0$  Hz, 1H), 4.20 – 4.09 (m, 1H), 3.44 – 3.31 (m, 2H), 3.23 (s, 4H), 3.10 (dd,  $J = 18.1, 7.3$  Hz, 1H), 2.88 – 2.73 (m, 1H) ppm.  $^{13}\text{C}$  NMR (125 MHz,  $\text{CDCl}_3$ )  $\delta$  187.1, 156.7, 152.4, 146.7, 136.1, 128.6, 128.3, 117.5, 112.5, 109.1, 105.8, 67.8, 56.3, 48.0, 46.6, 39.8, 35.3 ppm. **HRMS**:  $[\text{M}+\text{H}]^+$  *calcd.* For  $\text{C}_{20}\text{H}_{22}\text{NO}_7^+$  388.1391, found 388.1390.  $[\alpha]_{\text{D}}^{20}$  57.32 ( $c = 1.58$  in  $\text{CHCl}_3$ ). The enantiomeric excess was determined by HPLC analysis on Daicel Chiralpak IB column [*n*-hexane/*i*-PrOH = 80/20, 1 mL/min],  $\lambda = 210$  nm,  $t_{\text{major}} = 27.61$  min,  $t_{\text{minor}} = 25.12$  min, **ee** = 99%. The diastereomeric ratio was determined by NMR **dr** >20:1.

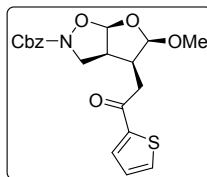

benzyl (3a*S*,4*S*,5*R*,6a*R*)-5-methoxy-4-(2-oxo-2-(thiophen-2-yl)ethyl)tetrahydrofuro[3,2-*d*]isoxazole-2(3*H*)-carboxylate (**5l**)

**5l** was obtained as a colorless oil 17 mg in 42% yield for two steps after column chromatography on silica gel (petroleum ether/ethyl acetate = 3/1). **<sup>1</sup>H NMR** (400 MHz, CDCl<sub>3</sub>) δ 7.71 (s, 1H), 7.66 (d, *J* = 4.9 Hz, 1H), 7.41 (d, *J* = 7.3 Hz, 2H), 7.38 – 7.28 (m, 3H), 7.13 (t, *J* = 4.3 Hz, 1H), 5.96 (d, *J* = 4.3 Hz, 1H), 5.28 (d, *J* = 12.3 Hz, 1H), 5.12 (d, *J* = 12.3 Hz, 1H), 4.97 (d, *J* = 5.0 Hz, 1H), 4.13 (d, *J* = 8.3 Hz, 1H), 3.40 – 3.28 (m, 3H), 3.24 (s, 3H), 3.16 (dd, *J* = 17.8, 7.4 Hz, 1H), 2.90 – 2.82 (m, 1H) ppm. **<sup>13</sup>C NMR** (125 MHz, CDCl<sub>3</sub>) δ 191.0, 156.7, 143.7, 136.1, 134.2, 132.5, 128.7, 128.4, 128.4, 128.3, 109.2, 105.8, 67.9, 56.3, 48.0, 46.6, 40.2, 36.0 ppm. **HRMS**: [M+H]<sup>+</sup> *calcd.* For C<sub>20</sub>H<sub>22</sub>NO<sub>6</sub>S<sup>+</sup> 404.1162, found 404.1162. [α]<sub>D</sub><sup>20</sup> 50.59 (*c* = 0.92 in CHCl<sub>3</sub>). The enantiomeric excess was determined by HPLC analysis on Daicel Chiralpak IB column [*n*-hexane/*i*-PrOH = 80/20, 1 mL/min], λ = 260 nm, *t*<sub>major</sub> = 27.37 min, *t*<sub>minor</sub> = 24.43 min, **ee** >99%. The diastereomeric ratio was determined by NMR **dr** >20:1.

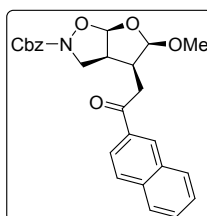

benzyl (3a*S*,4*S*,5*R*,6a*R*)-5-methoxy-4-(2-(naphthalen-2-yl)-2-oxoethyl)tetrahydrofuro[3,2-*d*]isoxazole-2(3*H*)-carboxylate (**5m**)

**5m** was obtained as a colorless oil 27 mg in 60% yield for two steps after column chromatography on silica gel (petroleum ether/ethyl acetate = 7/2). **<sup>1</sup>H NMR** (500 MHz, CDCl<sub>3</sub>) δ 8.50 (s, 1H), 8.02 (dd, *J* = 8.6, 1.8 Hz, 1H), 7.99 – 7.94 (m, 1H), 7.94 – 7.85 (m, 2H), 7.61 (dddd, *J* = 23.9, 8.2, 6.9, 1.3 Hz, 2H), 7.46 – 7.38 (m, 2H), 7.35 – 7.26 (m, 3H), 6.00 (d, *J* = 5.2 Hz, 1H), 5.29 (d, *J* = 12.3 Hz, 1H), 5.13 (d, *J* = 12.3 Hz, 1H), 5.05 (d, *J* = 5.1 Hz, 1H), 4.20 (dd, *J* = 10.8, 2.3 Hz, 1H), 3.54 (dd, *J* = 18.2, 7.3 Hz, 1H), 3.50 – 3.32 (m, 3H), 3.26 (s, 3H), 2.94 (qd, *J* = 7.4, 5.0 Hz, 1H) ppm. **<sup>13</sup>C NMR** (125 MHz, CDCl<sub>3</sub>) δ 197.9, 136.1, 135.8, 133.8, 132.6, 130.0, 129.7, 128.8, 128.7, 128.6, 128.3, 128.3, 127.9, 127.1, 123.7, 109.2, 105.9, 67.9, 56.3, 48.1, 46.7, 40.2, 35.6 ppm. **HRMS**: [M+H]<sup>+</sup> *calcd.* For C<sub>26</sub>H<sub>26</sub>NO<sub>6</sub><sup>+</sup>

448.1755, found 448.1754.  $[\alpha]_D^{20}$  65.93 ( $c = 1.68$  in  $\text{CHCl}_3$ ). The enantiomeric excess was determined by HPLC analysis on Daicel Chiralpak IA column [ $n$ -hexane/ $i$ -PrOH = 80/20, 1 mL/min],  $\lambda = 260$  nm,  $t_{\text{major}} = 28.01$  min,  $t_{\text{minor}} = 16.74$  min, **ee** = **99%**. The diastereomeric ratio was determined by NMR **dr** >**20:1**.

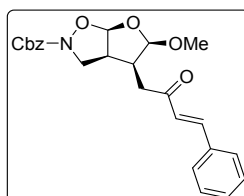

benzyl (3a*S*,4*S*,5*R*,6a*R*)-5-methoxy-4-((*E*)-2-oxo-4-phenylbut-3-en-1-yl)tetrahydrofuro[3,2-*d*]isoxazole-2(3*H*)-carboxylate (**5n**)

**5n** was obtained as a colorless oil 23 mg in 54% yield for two steps after column chromatography on silica gel (petroleum ether/ethyl acetate = 3/1). **<sup>1</sup>H NMR** (500 MHz,  $\text{CDCl}_3$ )  $\delta$  7.61 – 7.51 (m, 3H), 7.47 – 7.38 (m, 5H), 7.38 – 7.27 (m, 3H), 6.73 (d,  $J = 16.2$  Hz, 1H), 5.95 (d,  $J = 4.2$  Hz, 1H), 5.28 (d,  $J = 10.2$  Hz, 1H), 5.13 (d,  $J = 12.3$  Hz, 1H), 4.96 (d,  $J = 5.0$  Hz, 1H), 4.12 (q,  $J = 8.5$  Hz, 1H), 3.37 (d,  $J = 6.5$  Hz, 2H), 3.24 (s, 3H), 3.09 (dd,  $J = 18.0$ , 7.4 Hz, 1H), 2.93 (dd,  $J = 18.0$ , 7.1 Hz, 1H), 2.85 – 2.76 (m, 1H) ppm. **<sup>13</sup>C NMR** (125 MHz,  $\text{CDCl}_3$ )  $\delta$  197.9, 156.8, 143.4, 136.1, 134.3, 130.9, 129.1, 128.6, 128.5, 128.3, 128.3, 125.9, 109.1, 105.9, 67.9, 56.2, 48.1, 46.6, 40.1, 37.5 ppm. **HRMS**:  $[\text{M}+\text{H}]^+$  *calcd.* For  $\text{C}_{24}\text{H}_{26}\text{NO}_6^+$  424.1755, found 424.1757.  $[\alpha]_D^{20}$  47.50 ( $c = 0.90$  in  $\text{CHCl}_3$ ). The enantiomeric excess was determined by HPLC analysis on Daicel Chiralpak IA column [ $n$ -hexane/ $i$ -PrOH = 80/20, 1 mL/min],  $\lambda = 210$  nm,  $t_{\text{major}} = 26.10$  min,  $t_{\text{minor}} = 18.63$  min, **ee** = **95%**. The diastereomeric ratio was determined by NMR **dr** >**20:1**.

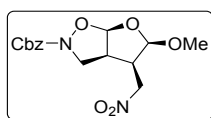

benzyl (3a*S*,4*R*,5*R*,6a*R*)-5-methoxy-4-(nitromethyl)tetrahydrofuro[3,2-*d*]isoxazole-2(3*H*)-carboxylate (**5o**)

**5o** was obtained as a colorless oil 13 mg in 40% yield for two steps after column chromatography on silica gel (petroleum ether/ethyl acetate = 3/1). **<sup>1</sup>H NMR** (500 MHz,  $\text{CDCl}_3$ )  $\delta$  7.43 – 7.29 (m, 5H), 5.99 (d,  $J = 5.4$  Hz, 1H), 5.25 (d,  $J = 12.3$  Hz, 1H), 5.15 (d,  $J = 12.2$  Hz, 1H), 5.00 (d,  $J = 5.0$  Hz, 1H), 4.70 (dd,  $J = 14.3$ , 7.0 Hz, 1H), 4.58 (dd,  $J = 14.3$ , 8.1 Hz, 1H), 4.13 (dd,  $J = 11.8$ , 2.9 Hz, 1H), 3.46 (dd,  $J = 11.8$ , 9.8 Hz, 1H), 3.34 (dddd,  $J = 9.8$ , 8.4, 5.5, 2.9 Hz, 1H), 3.24 (s, 3H), 3.04 (tdd,  $J = 8.3$ , 7.0, 5.0 Hz, 1H) ppm. **<sup>13</sup>C NMR** (125

MHz, CDCl<sub>3</sub>)  $\delta$  156.4, 135.7, 128.6, 128.4, 128.2, 109.2, 104.2, 72.0, 68.0, 56.3, 46.9, 46.1, 42.5 ppm. **HRMS**: [M+H]<sup>+</sup> *calcd.* For C<sub>15</sub>H<sub>19</sub>N<sub>2</sub>O<sub>7</sub><sup>+</sup> 339.3235, found 339.3233. [ $\alpha$ ]<sub>D</sub><sup>20</sup> 20.69 (*c* = 0.83 in CHCl<sub>3</sub>). The enantiomeric excess was determined by HPLC analysis on Daicel Chiralpak IA column [*n*-hexane/*i*-PrOH = 80/20, 1 mL/min],  $\lambda$  = 205 nm, *t*<sub>major</sub> = 15.10 min, *t*<sub>minor</sub> = 17.17 min, **ee** >99%. The diastereomeric ratio was determined by NMR **dr** >20:1.

## F. Synthesis of Bicyclic 1,2-Oxazinane Derivatives

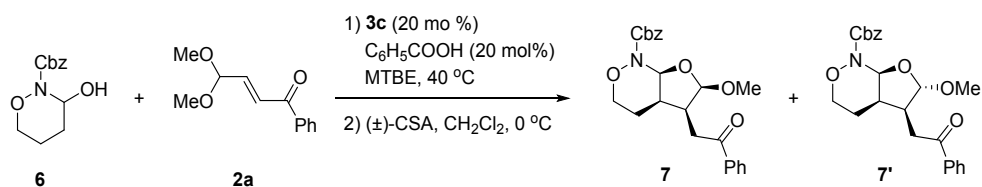

A glass vial equipped with a magnetic stirring bar was charged with lactols **6** (23.7 mg, 0.10 mmol, 1.0 equiv), **2** (26.7 mg, 0.13 mmol, 1.3 equiv), **3c** (7.4 mg, 0.02 mmol, 0.2 equiv) and C<sub>6</sub>H<sub>5</sub>COOH (2.4 mg, 0.02 mmol, 0.2 equiv) in MTBE (0.3 mL) at 40 °C. The reaction was stirred at 40 °C for 4 d. After completion of the reaction, the reaction mixture was concentrated and the residue was purified by flash chromatography on silica gel (petroleum ether/ethyl acetate = 5:2) to afford **S7** and **S7'**. Then, compound **S7** and **S7'** (1.0 equiv) was respectively dissolved in anhydrous CH<sub>2</sub>Cl<sub>2</sub> (0.10 mmol in 0.6 mL) at 0 °C. CSA (0.2 equiv) was added to the reaction mixtures. The reaction was stirred at 0 °C for 12 h until the consumption of **S7** and **S7'**, the reaction mixture was concentrated and the residue was purified by flash chromatography on silica gel (petroleum ether/ethyl acetate = 4:1) to give product **7** and **7'** for NMR and HPLC analysis.

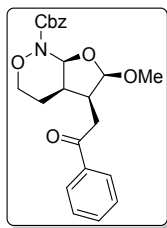

benzyl (4aR,5S,6R,7aS)-6-methoxy-5-(2-oxo-2-phenylethyl)hexahydro-1H-furo[2,3-c][1,2]oxazine-1-carboxylate (7)

**7** was obtained as a colorless oil 12 mg in 29% yield for two steps after column chromatography on silica gel (petroleum ether/ethyl acetate = 4/1). **<sup>1</sup>H NMR** (500 MHz, CDCl<sub>3</sub>) δ 8.01 – 7.96 (m, 2H), 7.58 (t, *J* = 7.4 Hz, 1H), 7.48 (t, *J* = 7.7 Hz, 2H), 7.36 (ddd, *J* = 13.4, 12.1, 5.0 Hz, 5H), 5.92 (d, *J* = 4.6 Hz, 1H), 5.26 (q, *J* = 12.3 Hz, 2H), 5.03 (d, *J* = 5.4 Hz, 1H), 4.16 (dd, *J* = 11.2, 4.4 Hz, 1H), 3.74 (dd, *J* = 17.4, 6.6 Hz, 1H), 3.38 – 3.27 (m, 4H), 3.16 (dd, *J* = 18.3, 7.4 Hz, 1H), 3.01 – 2.92 (m, 1H), 2.49 – 2.33 (m, 2H), 1.43 (dd, *J* = 12.4, 6.1 Hz, 1H) ppm. **<sup>13</sup>C NMR** (125 MHz, CDCl<sub>3</sub>) δ 198.6, 136.8, 135.9, 133.4, 128.8, 128.7, 128.4, 128.4, 128.1, 104.6, 70.1, 68.1, 55.9, 41.5, 33.6, 33.5, 22.6 ppm. **HRMS**: [M+Na]<sup>+</sup> *calcd.* For C<sub>23</sub>H<sub>25</sub>NNaO<sub>6</sub><sup>+</sup> 434.1574, found 434.1577. **[α]<sub>D</sub><sup>20</sup>** 15.57 (*c* = 0.68 in CHCl<sub>3</sub>). The enantiomeric excess was determined by HPLC analysis on Daicel Chiralpak IA column [*n*-hexane/*i*-PrOH = 80/20, 1 mL/min], λ = 210 nm, *t*<sub>major</sub> = 17.95 min, *t*<sub>minor</sub> = 14.69 min, **ee** = **98%**. The diastereomeric ratio was determined by NMR **dr** >**20:1**.

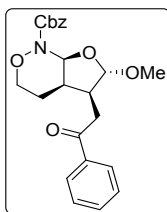

benzyl (4aR,5S,6S,7aS)-6-methoxy-5-(2-oxo-2-phenylethyl)hexahydro-1H-furo[2,3-c][1,2]oxazine-1-carboxylate (7')

**7'** was obtained as a colorless oil 14 mg in 34% yield for two steps after column chromatography on silica gel (petroleum ether/ethyl acetate = 4/1). **<sup>1</sup>H NMR** (500 MHz, CDCl<sub>3</sub>) δ 7.95 (d, *J* = 7.6 Hz, 2H), 7.59 (t, *J* = 7.4 Hz, 1H), 7.48 (t, *J* = 7.7 Hz, 2H), 7.36 (ddd, *J* = 20.1, 13.0, 7.1 Hz, 5H), 6.05 (d, *J* = 3.6 Hz, 1H), 5.25 (q, *J* = 12.3 Hz, 2H), 4.96 (d, *J* = 6.2 Hz, 1H), 4.12 (dd, *J* = 11.4, 3.9 Hz, 1H), 3.77 (t, *J* = 11.6 Hz, 1H), 3.45 (s, 3H), 3.30 (dd, *J* = 17.4, 4.0 Hz, 1H), 3.12 (dd, *J* = 17.4, 11.0 Hz, 1H), 2.79 (td, *J* = 10.6, 6.1 Hz, 1H), 2.67 (td, *J*

= 11.0, 6.1 Hz, 1H), 1.70 (ddd,  $J$  = 24.8, 12.4, 4.8 Hz, 1H), 1.51 (dd,  $J$  = 13.4, 6.4 Hz, 1H) ppm.  $^{13}\text{C}$  NMR (125 MHz,  $\text{CDCl}_3$ )  $\delta$  198.2, 136.4, 135.8, 133.6, 128.9, 128.7, 128.4, 128.3, 128.1, 107.5, 69.7, 68.1, 56.9, 44.3, 35.5, 35.3, 22.4 ppm. HRMS:  $[\text{M}+\text{Na}]^+$  calcd. For  $\text{C}_{23}\text{H}_{25}\text{NNaO}_6^+$  434.1574, found 434.1576.  $[\alpha]_{\text{D}}^{20}$  58.98 ( $c$  = 0.61 in  $\text{CHCl}_3$ ). The enantiomeric excess was determined by HPLC analysis on Daicel Chiralpak IA column [ $n$ -hexane/ $i$ -PrOH = 80/20, 1 mL/min],  $\lambda$  = 210 nm,  $t_{\text{major}}$  = 27.45 min,  $t_{\text{minor}}$  = 11.99 min, ee = 99%. The diastereomeric ratio was determined by NMR  $dr$  >20:1.

## G. Synthetic transformation

### 2-((3*aS*,4*S*,5*R*,6*aR*)-5-methoxyhexahydrofuro[3,2-*d*]isoxazol-4-yl)-1-phenylethan-1-one (8)

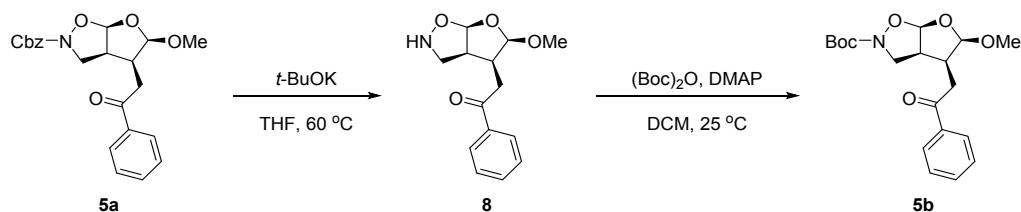

To a solution of **5a** (20 mg, 0.05 mmol) in anhydrous THF (0.4 mL) was added  $t$ -BuOK (28 mg, 0.25 mmol) at room temperature. The reaction was stirred at 60 °C for 48 h. The mixture was extracted with ethyl acetate. The combine organic layers were dried over  $\text{Na}_2\text{SO}_4$  and the solvent evaporated. The product was purified by column chromatography on a silica gel (petroleum ether/ethyl acetate = 3/2) to afford the desired product **8** colorless oil (12 mg, 91%).  $^1\text{H}$  NMR (500 MHz,  $\text{CDCl}_3$ )  $\delta$  7.98 (d,  $J$  = 8.0 Hz, 2H), 7.59 (t,  $J$  = 7.1 Hz, 1H), 7.48 (t,  $J$  = 7.6 Hz, 2H), 6.47 (s, 1H), 6.00 (d,  $J$  = 5.1 Hz, 1H), 4.99 (d,  $J$  = 4.9 Hz, 1H), 3.38 (s, 3H), 3.36 – 3.24 (m, 2H), 3.17 (dd,  $J$  = 18.2, 6.7 Hz, 1H), 3.06 (d,  $J$  = 12.2 Hz, 1H), 2.87 (dt,  $J$  = 15.4, 8.2 Hz, 2H) ppm.  $^{13}\text{C}$  NMR (125 MHz,  $\text{CDCl}_3$ )  $\delta$  198.0, 136.6, 133.6, 128.9, 128.1, 109.7, 104.4, 55.6, 49.2, 48.7, 40.2, 35.5 ppm. HRMS:  $[\text{M}+\text{Na}]^+$  calcd. For  $\text{C}_{14}\text{H}_{17}\text{NNaO}_4^+$  286.1050, found 286.1052.  $[\alpha]_{\text{D}}^{20}$  -46.43 ( $c$  = 0.54 in  $\text{CHCl}_3$ ). The enantiomeric excess was determined by HPLC analysis on Daicel Chiralpak IA column [ $n$ -hexane/ $i$ -PrOH = 80/20, 1 mL/min],  $\lambda$  = 240 nm,  $t_{\text{major}}$  = 10.31

min,  $t_{\text{minor}} = 9.63$  min, **ee** = **93%**. The diastereomeric ratio was determined by NMR **dr** **>20:1**.

To a solution of **8** (8 mg, 0.03 mmol) and di-*tert*-butyl dicarbonate (17 mg, 0.08 mmol) in anhydrous  $\text{CH}_2\text{Cl}_2$  (0.2 mL) was added DMAP (0.75 mg, 0.006 mmol) at 0 °C. The reaction was stirred at 25 °C for 2 h before the solvent was removed under vacuum. The product was purified by column chromatography on a silica gel (petroleum ether/ethyl acetate = 3/2) to afford the desired product **5b** colorless oil (10.7 mg, 97%). The enantiomeric excess was determined by HPLC analysis on Daicel Chiralpak IA column [*n*-hexane/*i*-PrOH = 80/20, 1 mL/min],  $\lambda = 210$  nm,  $t_{\text{major}} = 8.69$  min,  $t_{\text{minor}} = 7.58$  min, **ee** = **91%**. The diastereomeric ratio was determined by NMR **dr** **>20:1**.

**benzyl (3a*S*,4*S*,6a*R*)-5-oxo-4-(2-oxo-2-phenylethyl)tetrahydrofuro[3,2-*d*]isoxazole-2(3*H*)-carboxylate (**9**)**

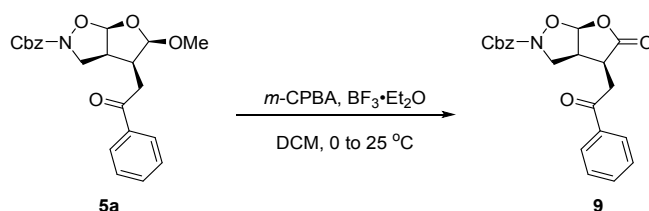

To a solution of **5a** (30 mg, 0.07 mmol) and *m*-CPBA (25 mg, 0.15 mmol) in anhydrous  $\text{CH}_2\text{Cl}_2$  (2 mL) was added  $\text{BF}_3\cdot\text{Et}_2\text{O}$  (19 mg, 0.14 mmol) at 0 °C. The reaction was stirred at 25 °C for 4 h before the solvent was removed under vacuum. The product was purified by column chromatography on a silica gel (petroleum ether/ethyl acetate = 7/2) to afford the desired product **7** colorless oil (20 mg, 70%). **<sup>1</sup>H NMR** (500 MHz,  $\text{CDCl}_3$ )  $\delta$  8.01 – 7.92 (m, 2H), 7.63 (t,  $J = 7.4$  Hz, 1H), 7.50 (t,  $J = 7.7$  Hz, 2H), 7.38 (dt,  $J = 9.9, 7.3$  Hz, 5H), 6.24 (d,  $J = 5.4$  Hz, 1H), 5.25 (d,  $J = 12.1$  Hz, 1H), 5.15 (d,  $J = 12.1$  Hz, 1H), 3.89 (dt,  $J = 6.0, 5.1$  Hz, 2H), 3.74 (dd,  $J = 18.7, 3.0$  Hz, 1H), 3.49 – 3.41 (m, 1H), 3.41 – 3.29 (m, 2H) ppm. **<sup>13</sup>C NMR** (125 MHz,  $\text{CDCl}_3$ )  $\delta$  197.0, 174.7, 158.4, 135.7, 135.1, 134.2, 129.0, 128.8, 128.7, 128.6, 128.3, 105.0, 69.2, 46.9, 46.0, 37.7, 37.1 ppm. **HRMS**:  $[\text{M}+\text{Na}]^+$  *calcd.* For

$\text{C}_{21}\text{H}_{19}\text{NNaO}_6^+$  404.1105, found 404.1106.  $[\alpha]_{\text{D}}^{20}$  113.33 ( $c = 1.00$  in  $\text{CHCl}_3$ ). The enantiomeric excess was determined by HPLC analysis on Daicel Chiralpak IA column [ $n$ -hexane/ $i$ -PrOH = 80/20, 1 mL/min],  $\lambda = 210$  nm,  $t_{\text{major}} = 17.79$  min,  $t_{\text{minor}} = 19.19$  min, **ee = 94%**. The diastereomeric ratio was determined by NMR **dr >20:1**.



## H. 1 mmol Scale synthesis of 5a



A glass vial equipped with a magnetic stirring bar was charged with benzyl hydroxycarbamate (167 mg, 1.0 mmol, 1.0 equiv), acrylaldehyde (84 mg, 1.8 mmol, 1.8 equiv), **2a** (268 mg, 1.3 mmol, 1.3 equiv), **3c** (74 mg, 0.2 mmol, 0.2 equiv) and  $\text{C}_6\text{H}_5\text{COOH}$  (25 mg, 0.2 mmol, 0.2 equiv) in MTBE (3 mL) at 40 °C. The reaction was stirred at 40 °C for 4.5 d until the consumption of benzyl hydroxycarbamate (monitored by TLC analysis). After completion of the reaction, the reaction mixture was concentrated and the residue was purified by flash chromatography on silica gel (petroleum ether/ethyl acetate = 2:1) to afford **4a/4a'** colorless oil (372 mg). Then, compound **4a/4a'** (372 mg, 0.85 mmol, 1.0 equiv) was dissolved in anhydrous  $\text{CH}_2\text{Cl}_2$  (5 mL) at 0 °C. CSA (39.3 mg, 0.17 mmol, 0.2 equiv) was added to the reaction mixtures. The reaction was stirred at 0 °C for 12 h until the consumption of **4a/4a'**, then the reaction mixture was concentrated and the residue was purified by flash chromatography on silica gel (petroleum ether/ethyl acetate = 5:2) to give product **5a** (179 mg, 63% over two steps, >99% ee, dr >20:1 ).

## I. Control experiments

### I1. Control experiment 1:

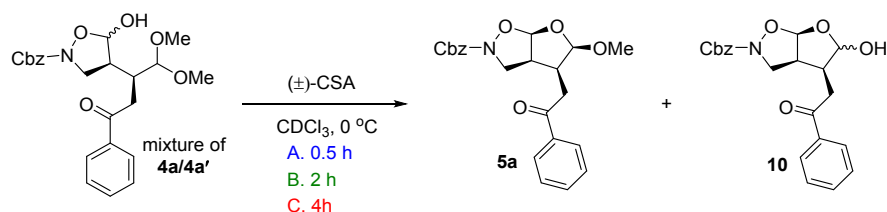

A glass vial equipped with a magnetic stirring bar was charged with mixture of **4a/4a'** (11 mg, 0.025 mmol, 1.0 equiv), CSA (1.2 mg, 0.005 mmol, 0.2 equiv) in  $\text{CDCl}_3$  (0.5 mL) at  $0^\circ\text{C}$ . After 0.5 h / 2 h / 4 h, the reaction mixture was transferred directly to the NMR tube for crude  $^1\text{H}$  NMR experiments. It is found that compound **10** is gradually consumed, while the amount of **5a** is increased.

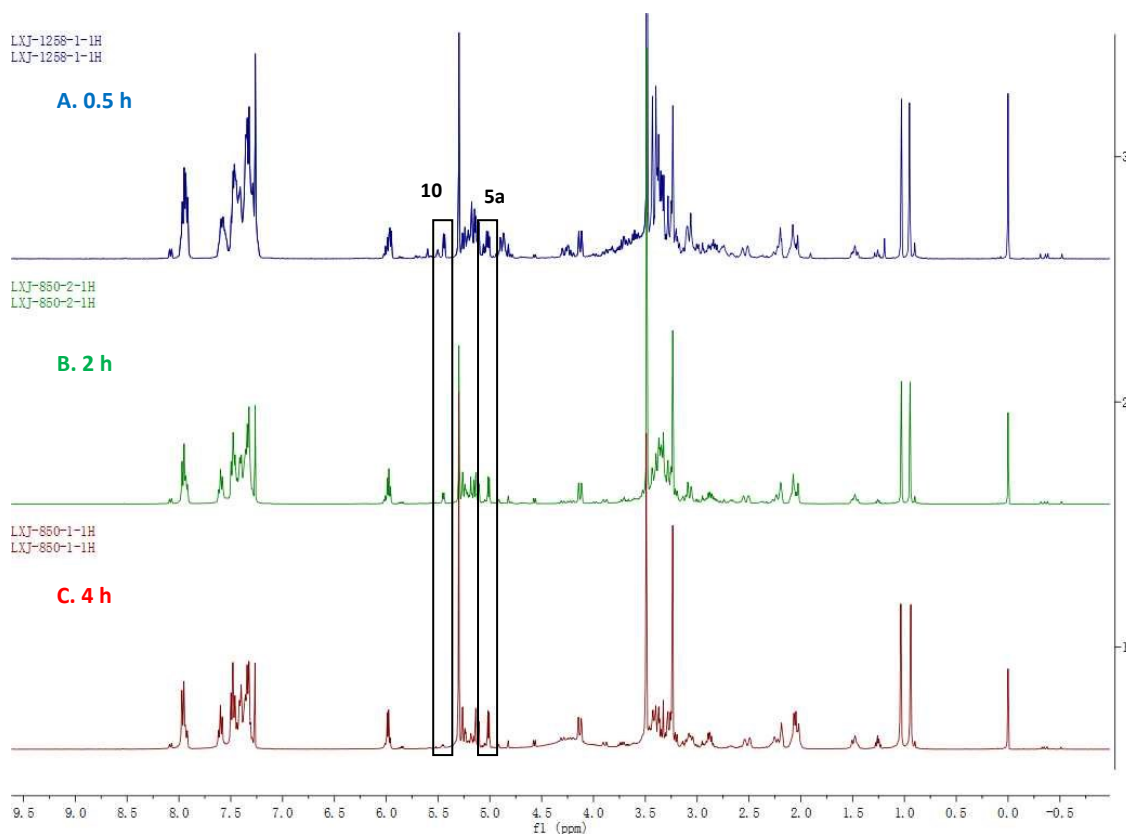

**Figure 1.** The  $^1\text{H}$  NMR spectrum of control experiment 1 (400 MHz,  $\text{CDCl}_3$ )

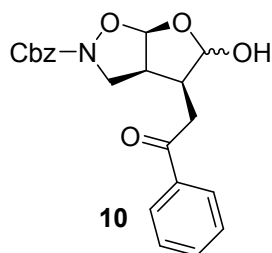

**$^1\text{H}$  NMR** (400 MHz,  $\text{CDCl}_3$ )  $\delta$  7.94 (d,  $J$  = 7.6 Hz, 2H), 7.59 (t,  $J$  = 7.2 Hz, 1H), 7.49 – 7.42 (m, 4H), 7.33 (q,  $J$  = 5.3 Hz, 3H), 5.96 (d,  $J$  = 5.3 Hz, 1H), 5.47 – 5.41 (m, 1H), 5.18 (dd,  $J$  = 29.1, 12.1 Hz, 2H), 4.13 (d,  $J$  = 11.2 Hz, 1H), 3.41 (ddd,  $J$  = 25.7, 12.5, 7.5 Hz, 3H), 3.22 (dd,  $J$  = 18.4, 7.5 Hz, 1H), 2.91 – 2.78 (m, 2H) ppm.  **$^{13}\text{C}$  NMR** (101 MHz,  $\text{CDCl}_3$ )  $\delta$  198.0, 157.9, 136.4, 136.0, 133.5, 128.7, 128.6, 128.6, 128.1, 109.2, 98.7, 67.9, 48.1, 47.2, 40.5, 35.5 ppm. **MS:**  $[\text{M}+\text{Na}]^+$  *calcd.* For  $\text{C}_{21}\text{H}_{21}\text{NNaO}_6^+$  406.13, found 406.11.

## I2. Control experiment 2:

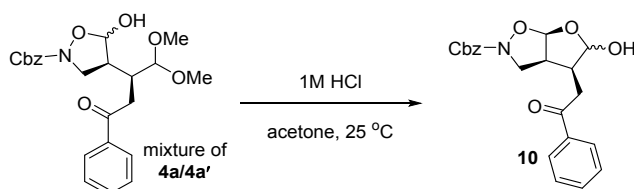

**Synthesis of compound 10:** A glass vial equipped with a magnetic stirring bar was charged with mixture of **4a/4a'** (22 mg, 0.05 mmol, 1.0 equiv), 1 M HCl (0.2 mL) and acetone (0.2 mL). The reaction was stirred at 25 °C for 4 h until the consumptions of **4a** and **4a'**, then the reaction mixture was purified by flash chromatography on silica gel (petroleum ether/ethyl acetate = 2:1) to give product **10** as a colorless oil (15 mg, 77%).

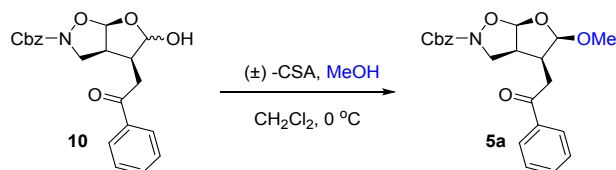

**Transformation between 10 and 5a:** Compound **10** (15 mg, 1.0 equiv) was dissolved in anhydrous  $\text{CH}_2\text{Cl}_2$  (0.4 mL) at 0 °C. Then MeOH (3  $\mu\text{L}$ , 2.0 equiv) and CSA (2.0 mg, 0.2 equiv) was added to the reaction mixture. The reaction was stirred at 0 °C for 15 h until the consumption of **10**, then the reaction mixture was purified by flash chromatography on silica gel (petroleum ether/ethyl acetate = 5:2) to give product **5a** (11 mg, 71%).

### I3. Control experiment 3:

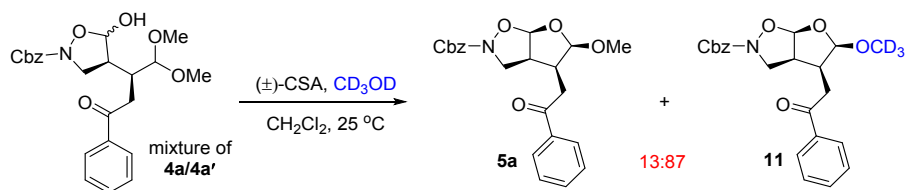

The mixture of **4a/4a'** (22 mg, 1.0 equiv) was dissolved in anhydrous  $\text{CH}_2\text{Cl}_2$  (0.5 mL) at  $0\text{ }^\circ\text{C}$ . Then  $\text{CD}_3\text{OD}$  (41  $\mu\text{L}$ , 20.0 equiv) and CSA (5.0 mg, 0.4 equiv) was added to the reaction mixture. The reaction was stirred at  $25\text{ }^\circ\text{C}$  for 2 h until the consumption of **4a/4a'**, then the reaction mixture was purified by flash chromatography on silica gel (petroleum ether/ethyl acetate = 5:2) to give mixture of **5a** and **11** (7 mg, 35%).

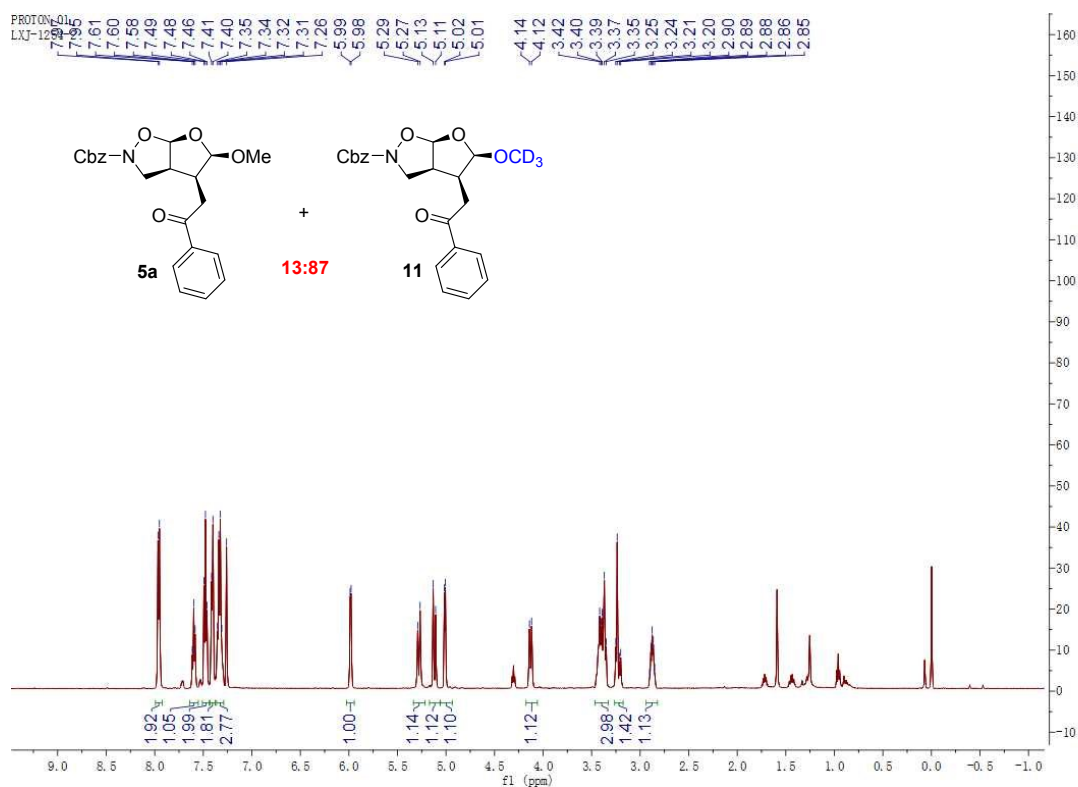

**Figure 2.** The  $^1\text{H}$  NMR spectrum of **5a+11** (500 MHz,  $\text{CDCl}_3$ )

#### I4. Control experiment 4:

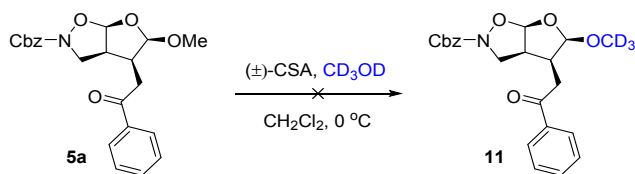

Compound **5a** (20 mg, 1.0 equiv) was dissolved in anhydrous  $\text{CH}_2\text{Cl}_2$  (0.3 mL) at  $0^\circ\text{C}$ . Then  $\text{CD}_3\text{OD}$  (20  $\mu\text{L}$ , 10.0 equiv) and CSA (2.3 mg, 0.2 equiv) was added to the reaction mixture. The reaction was stirred at  $0^\circ\text{C}$  for 11 h, then the reaction mixture was purified by flash chromatography on silica gel (petroleum ether/ethyl acetate = 5:2) for NMR analysis.

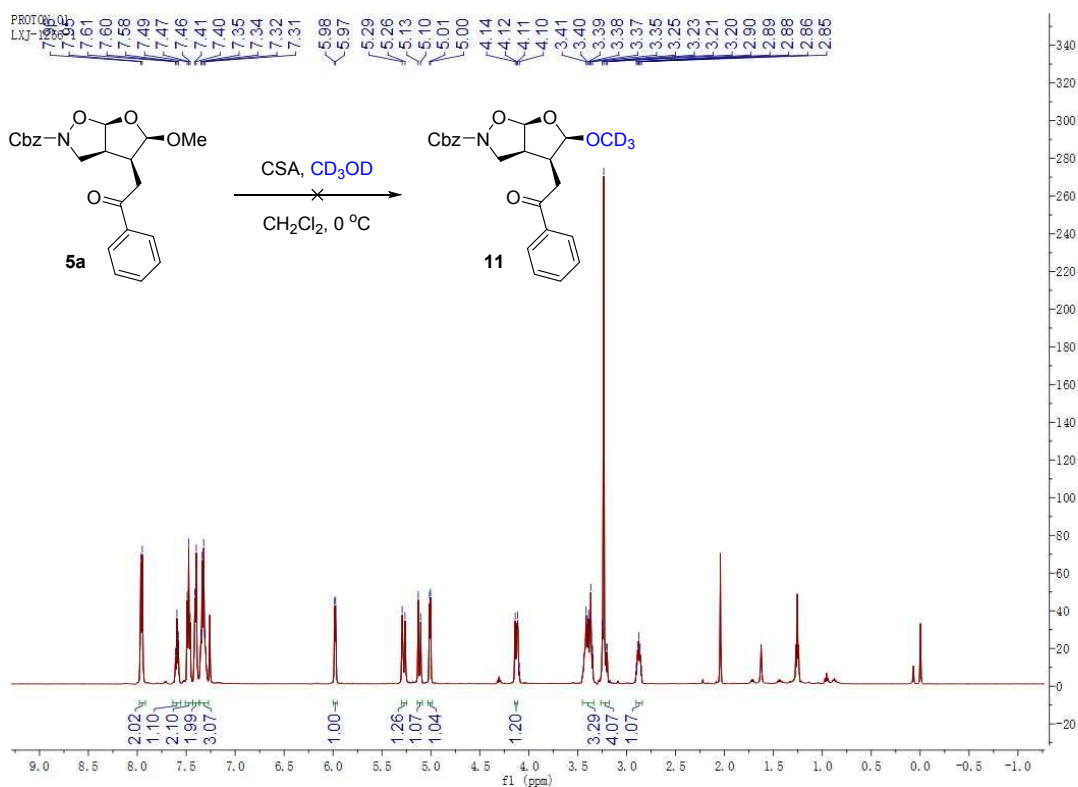

**Figure 3.** The  $^1\text{H}$  NMR spectrum of control experiment 4 (500 MHz,  $\text{CDCl}_3$ )

## I5. Control experiment 5:

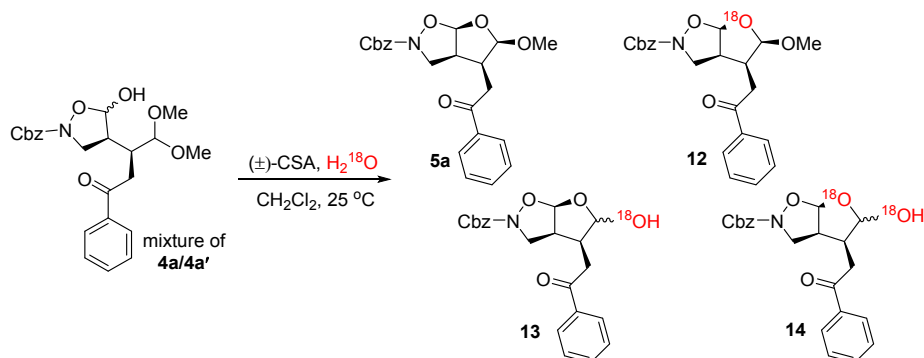

The mixture of **4a/4a'** (22 mg, 1.0 equiv) was dissolved in anhydrous  $\text{CH}_2\text{Cl}_2$  (0.5 mL) at  $25\text{ }^\circ\text{C}$ . Then  $\text{H}_2^{18}\text{O}$  (10  $\mu\text{L}$ , 10.0 equiv) and CSA (5.8 mg, 0.5 equiv) was added to the reaction mixture. The reaction was stirred at  $25\text{ }^\circ\text{C}$  for 5 h until the consumption of **4a/4a'**, then the reaction mixture was purified by flash chromatography on silica gel (petroleum ether/ethyl acetate = 2:1) to give compounds **5a**, **12**, **13** and **14** (11% yield for **5a** and **12**, 37% yield for **13** and **14**).

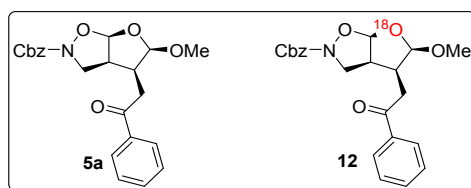

**5a+12** was obtained as a colorless oil 2 mg in 11% yield.  $^1\text{H NMR}$  (500 MHz,  $\text{CDCl}_3$ )  $\delta$  7.96 (d,  $J = 7.6\text{ Hz}$ , 2H), 7.60 (t,  $J = 7.3\text{ Hz}$ , 1H), 7.48 (t,  $J = 7.6\text{ Hz}$ , 2H), 7.41 (d,  $J = 6.9\text{ Hz}$ , 2H), 7.38 – 7.29 (m, 3H), 5.98 (d,  $J = 5.2\text{ Hz}$ , 1H), 5.28 (d,  $J = 12.3\text{ Hz}$ , 1H), 5.12 (d,  $J = 12.3\text{ Hz}$ , 1H), 5.01 (d,  $J = 5.0\text{ Hz}$ , 1H), 4.13 (d,  $J = 10.6\text{ Hz}$ , 1H), 3.47 – 3.33 (m, 3H), 3.29 – 3.19 (m, 4H), 2.88 (dd,  $J = 13.4, 6.9\text{ Hz}$ , 1H) ppm.  $^{13}\text{C NMR}$  (125 MHz,  $\text{CDCl}_3$ )  $\delta$  197.9, 156.6, 136.4, 135.9, 133.5, 128.7, 128.5, 128.2, 128.2, 128.0, 109.0, 109.0, 105.8, 105.8, 67.7, 56.1, 47.9, 46.5, 40.0, 35.4 ppm. **5a: MS**:  $[\text{M}+\text{Na}]^+$  *calcd.* For  $\text{C}_{22}\text{H}_{23}\text{NNaO}_6^+$  420.14, found 420.17. **12: MS**:  $[\text{M}+\text{Na}]^+$  *calcd.* For  $\text{C}_{22}\text{H}_{23}\text{NNaO}_5^{18}\text{O}^+$  422.15 found 422.11.

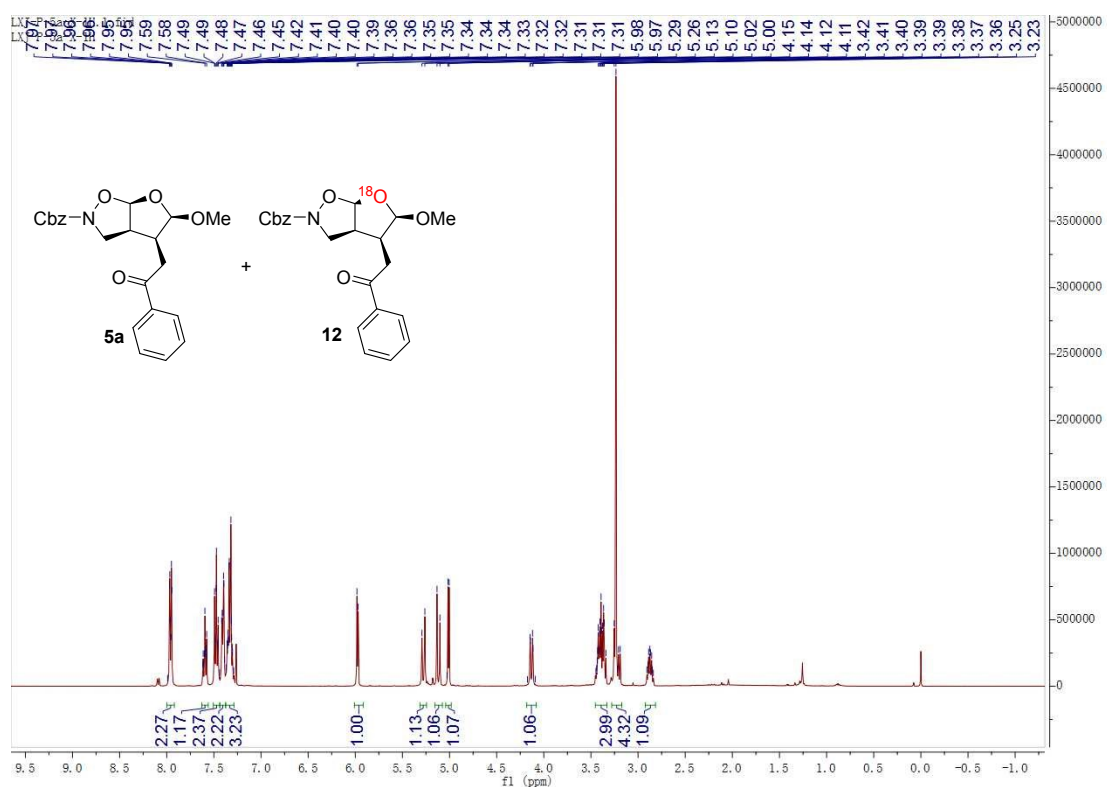

**Figure 4.** The  $^1\text{H}$  NMR spectrum of **5a+12** (500 MHz,  $\text{CDCl}_3$ )

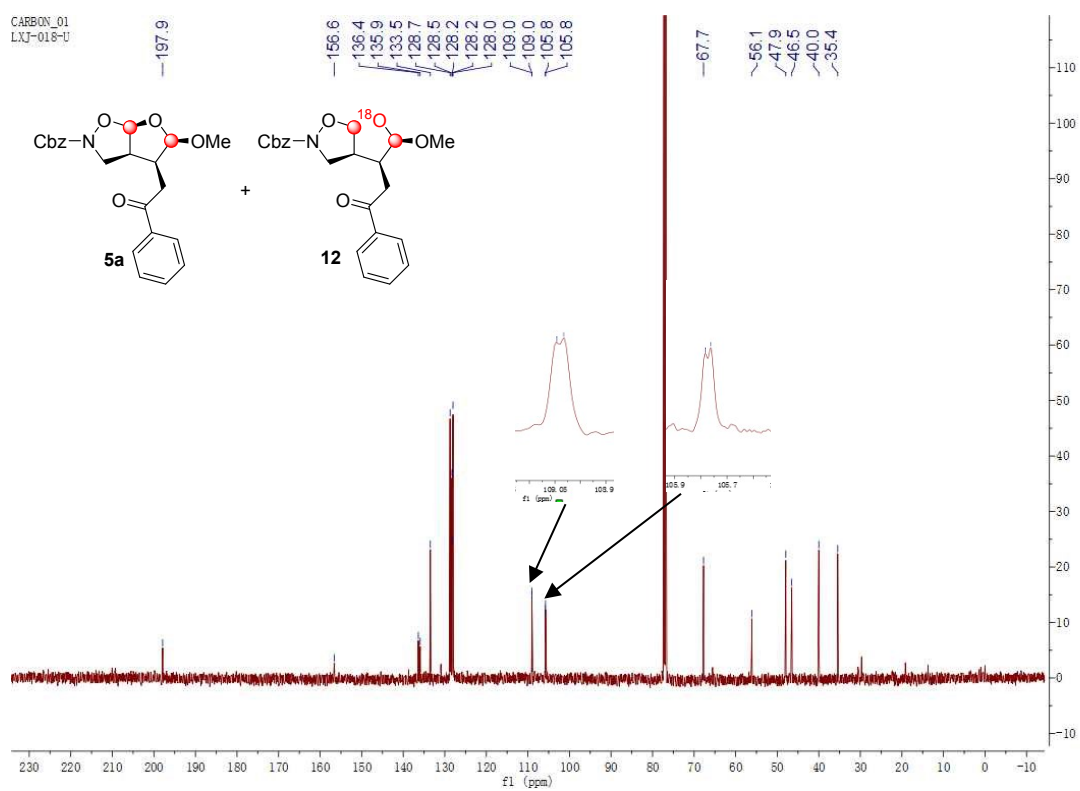

**Figure 5.** The  $^{13}\text{C}$  NMR spectrum of **5a+12** (125 MHz,  $\text{CDCl}_3$ )

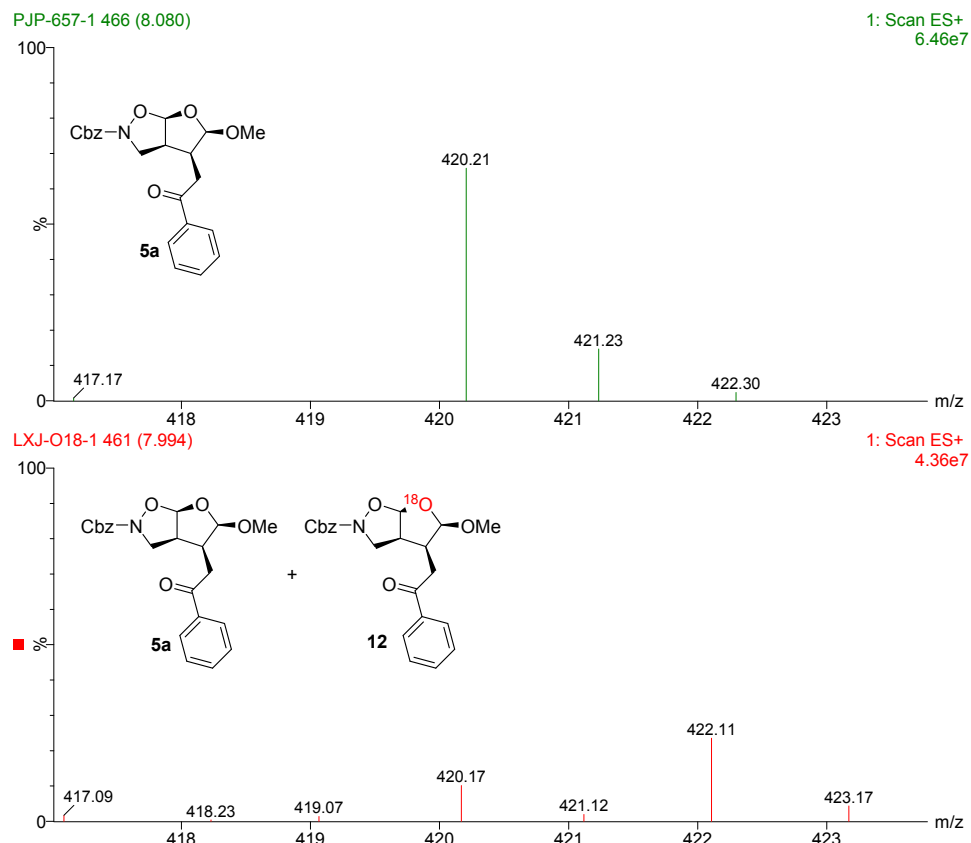

**Figure 6.** The MS of **5a** and **5a+12**

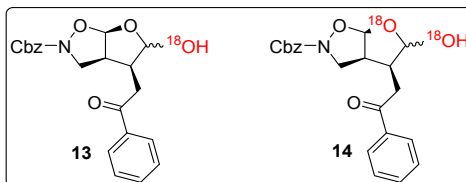

**13+14** was obtained as a colorless oil 7 mg in 37% yield. **<sup>1</sup>H NMR** (400 MHz, CDCl<sub>3</sub>)  $\delta$  7.94 (d,  $J$  = 7.4 Hz, 2H), 7.59 (t,  $J$  = 7.3 Hz, 1H), 7.47 (t,  $J$  = 7.7 Hz, 3H), 7.42 (d,  $J$  = 6.0 Hz, 2H), 7.33 (d,  $J$  = 6.6 Hz, 3H), 5.96 (d,  $J$  = 5.3 Hz, 1H), 5.45 (d,  $J$  = 4.8 Hz, 1H), 5.18 (q,  $J$  = 12.0 Hz, 2H), 4.13 (d,  $J$  = 11.3 Hz, 1H), 3.47 – 3.34 (m, 3H), 3.22 (dd,  $J$  = 18.5, 7.5 Hz, 1H), 2.83 (dt,  $J$  = 14.8, 7.4 Hz, 1H) ppm. **<sup>13</sup>C NMR** (100 MHz, CDCl<sub>3</sub>)  $\delta$  198.0, 157.9, 136.4, 136.0, 133.5, 128.7, 128.6, 128.6, 128.4, 128.1, 109.2, 109.2, 98.7, 98.6, 67.9, 48.1, 47.2, 40.5, 35.5 ppm. **13: MS:** [M+Na]<sup>+</sup> *calcd.* For C<sub>21</sub>H<sub>21</sub>NNaO<sub>5</sub><sup>18</sup>O<sup>+</sup> 408.13, found 408.08. **14: MS:** [M+Na]<sup>+</sup> *calcd.* For C<sub>21</sub>H<sub>21</sub>NNaO<sub>4</sub><sup>18</sup>O<sub>2</sub><sup>+</sup> 410.13 found 410.14.





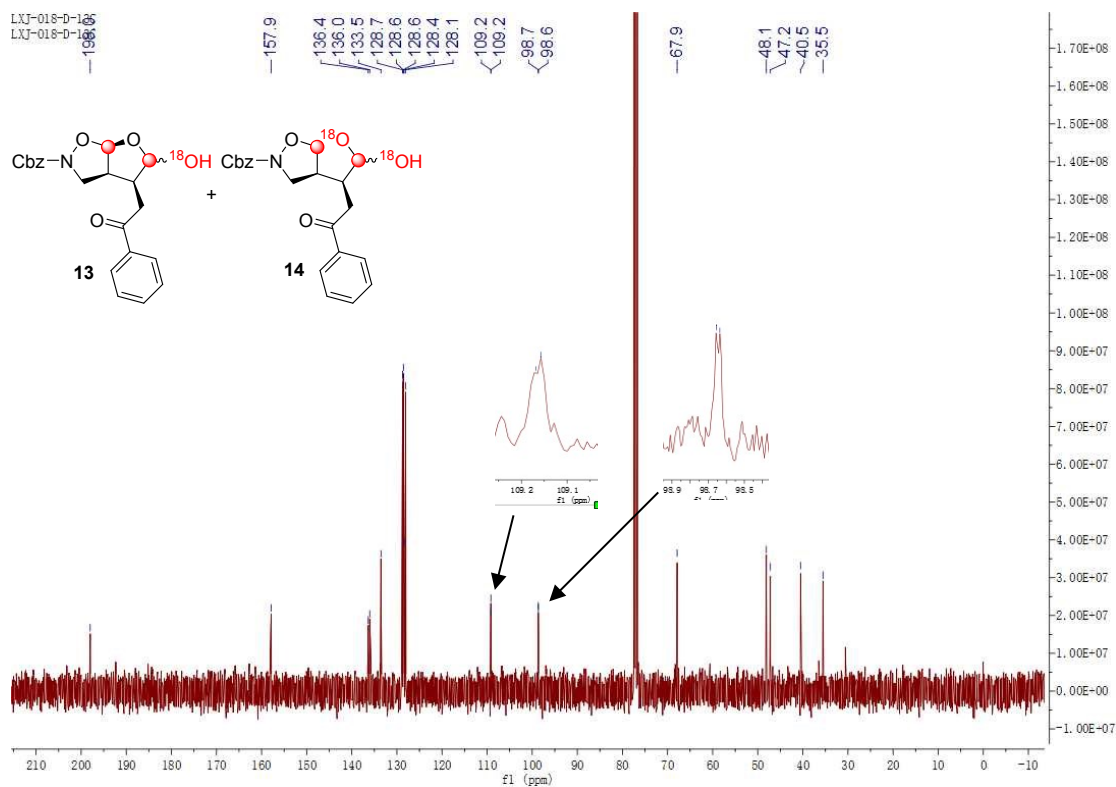

**Figure 9.** The  $^{13}\text{C}$  NMR spectrum of **13+14** (100 MHz,  $\text{CDCl}_3$ )

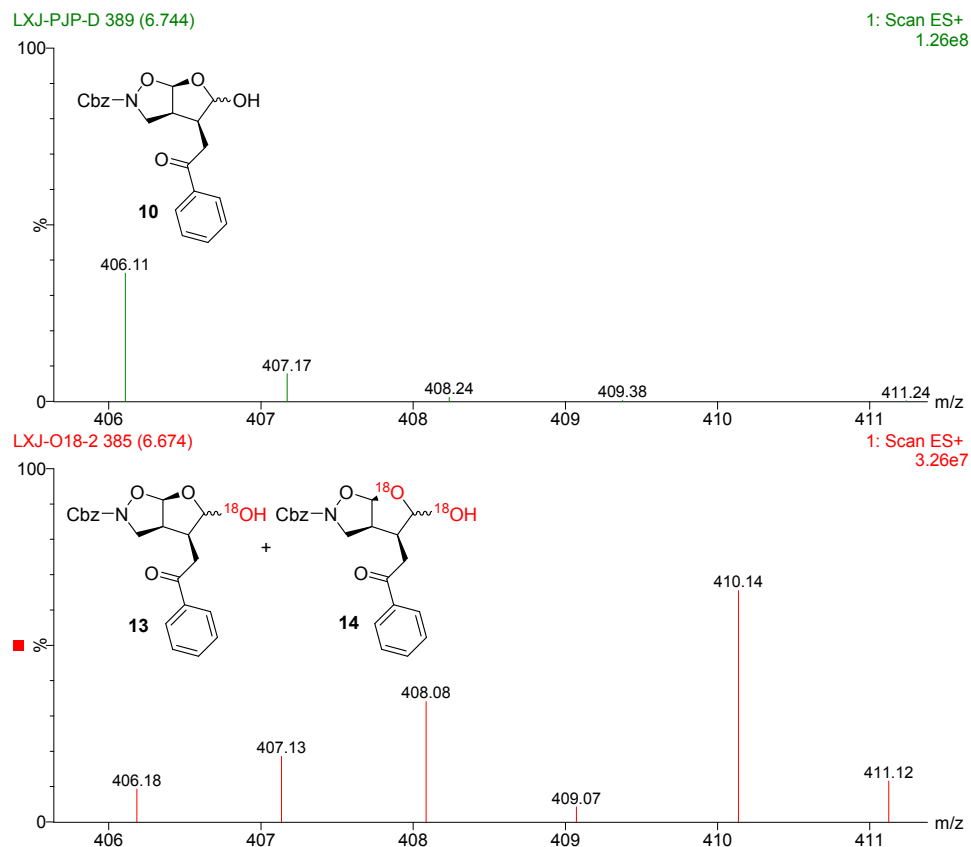

**Figure 10.** The MS of **10** and **13+14**

## I6. Control experiment 6:

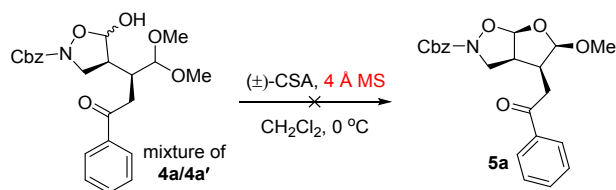

The mixture of **4a/4a'** (11 mg, 1.0 equiv) was dissolved in anhydrous  $\text{CH}_2\text{Cl}_2$  (0.3 mL) at 0 °C. Then CSA (1.1 mg, 0.2 equiv) and 4 Å MS (5 mg) was added to the reaction mixtures at 0 °C for 3 d. The reaction was detected by TLC.

## J. Other reactions:

### J1. The reaction of **1a** with (*E*)-4-oxo-4-phenylbut-2-enoic acid **15** :

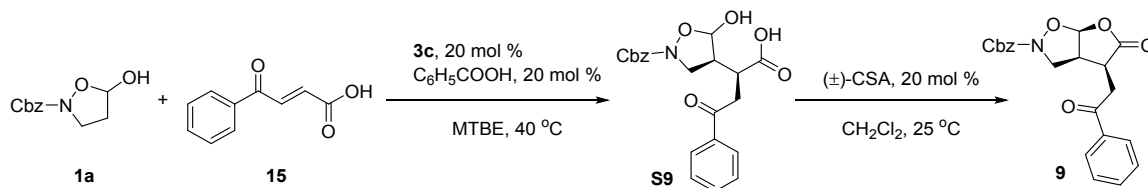

A glass vial equipped with a magnetic stirring bar was charged with lactols **1a** (22.3 mg, 0.10 mmol, 1.0 equiv), **15** (22.9 mg, 0.13 mmol, 1.3 equiv), **3c** (7.4 mg, 0.02 mmol, 0.2 equiv) and  $\text{C}_6\text{H}_5\text{COOH}$  (2.4 mg, 0.02 mmol, 0.2 equiv) in MTBE (0.3 mL) at 40 °C. After completion of the reaction, the reaction mixture was purified by flash chromatography on silica gel (petroleum ether/ethyl acetate = 1:1) to afford **S9** white solid (30 mg). Then, compound **S9** (1.0 equiv) was respectively dissolved in anhydrous  $\text{CH}_2\text{Cl}_2$  (0.10 mmol in 0.5 mL) at 25 °C. CSA (0.4 equiv) was added to the reaction mixture. The reaction was stirred at 25 °C for 12 h until the consumption of **S9**, the reaction mixture was purified by flash chromatography on silica gel (petroleum ether/ethyl acetate = 3:1) to give product **9** colorless oil (12 mg, 32%).  $[\alpha]_D^{20}$  115.62 ( $c = 0.31$  in  $\text{CHCl}_3$ ). The enantiomeric excess was determined by HPLC analysis on Daicel Chiralpak IA column [ $n$ -hexane/ $i$ -PrOH = 80/20, 1 mL/min],  $\lambda = 210$  nm,  $t_{\text{major}} = 17.75$  min,  $t_{\text{minor}} = 19.15$  min, **ee** = 96%. The diastereomeric ratio was determined by NMR **dr** >20:1.

## J2. The reaction of crotonaldehyde with benzyl hydroxyl carbamate and **2a**:

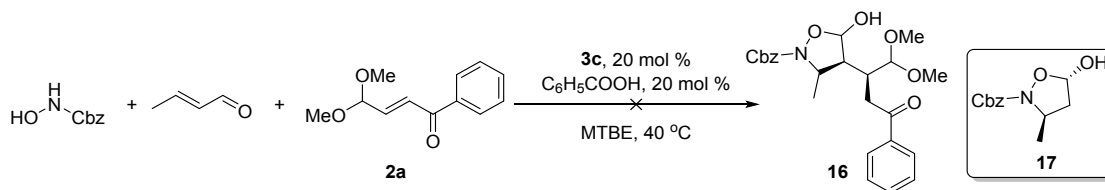

A glass vial equipped with a magnetic stirring bar was charged with benzyl hydroxyl carbamate (16.7 mg, 0.10 mmol, 1.0 equiv), crotonaldehyde (13 mg, 0.18 mmol, 1.8 equiv), **2a** (27 mg, 0.13 mmol, 1.3 equiv), **3c** (7.4 mg, 0.02 mmol, 0.2 equiv) and  $\text{C}_6\text{H}_5\text{COOH}$  (2.4 mg, 0.02 mmol, 0.2 equiv) in MTBE (0.3 mL) at 40 °C. The resulting reaction mixture was kept under vigorous stirring until the consumption of benzyl hydroxyl carbamate (monitored by TLC analysis). Instead of the compound **16**, the product **17** was obtained as colorless oil (20 mg, 84%).  **$^1\text{H}$  NMR** (400 MHz,  $\text{CDCl}_3$ )  $\delta$  7.41 – 7.28 (m, 5H), 5.69 (dd,  $J$  = 4.7, 2.7 Hz, 1H), 5.19 (q,  $J$  = 12.3 Hz, 2H), 4.40 (h,  $J$  = 6.8 Hz, 1H), 2.43 (dd,  $J$  = 12.5, 7.9 Hz, 1H), 1.95 – 1.82 (m, 1H), 1.31 (d,  $J$  = 6.4 Hz, 3H).  **$^{13}\text{C}$  NMR** (101 MHz,  $\text{CDCl}_3$ )  $\delta$  159.3, 135.9, 128.6, 128.3, 128.0, 98.6, 68.0, 54.1, 43.2, 21.5 ppm. **HRMS**:  $[\text{M}+\text{Na}]^+$  *calcd.* For  $\text{C}_{12}\text{H}_{15}\text{NO}_4\text{Na}^+$  260.0893, found 260.0889. The absolute configuration of lactol **19** was confirmed according to the literature.<sup>[4,5]</sup>

<sup>4</sup> Ibrahim I., Rios R., Vesely J., Zhao G.-L. and Córdova A., Organocatalytic asymmetric 5-hydroxyisoxazolidine synthesis: A highly enantioselective route to  $\alpha$ -amino acids. *Chem. Commun.*, **2007**, 849–851.

<sup>5</sup> Dou Q.-Y., Y.-Q. Zhang Tu, Y., Tian J.-M., Zhang F.-M. Wang and S.-H., Spiro-Pyrrolidine-Catalyzed Asymmetric Conjugate Addition of Hydroxylamine to Enals and 2,4-Dienals. *Adv. Synth. Catal.* **2016**, 358, 874 –879

## K. NMR spectra and HPLC traces

### The $^1\text{H}$ NMR spectrum of 4a/4a' (400 MHz, $\text{CDCl}_3$ )

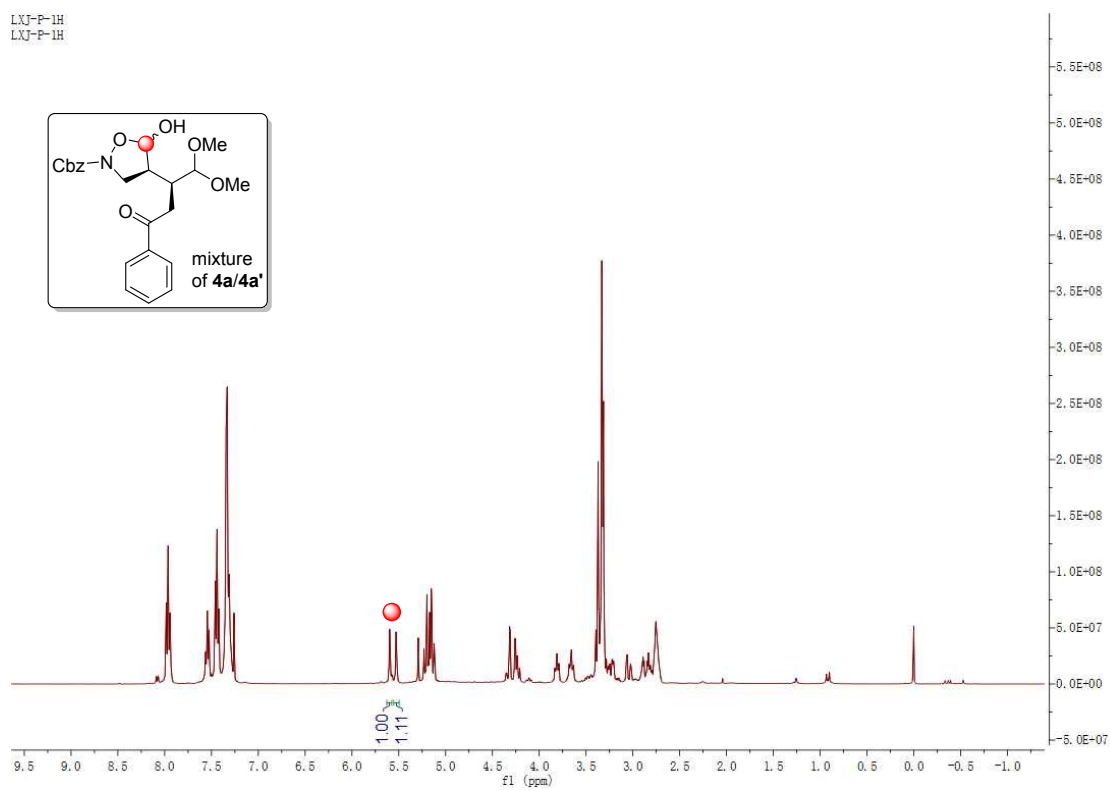

### The $^{13}\text{C}$ NMR spectrum of 4a/4a' (100 MHz, $\text{CDCl}_3$ )

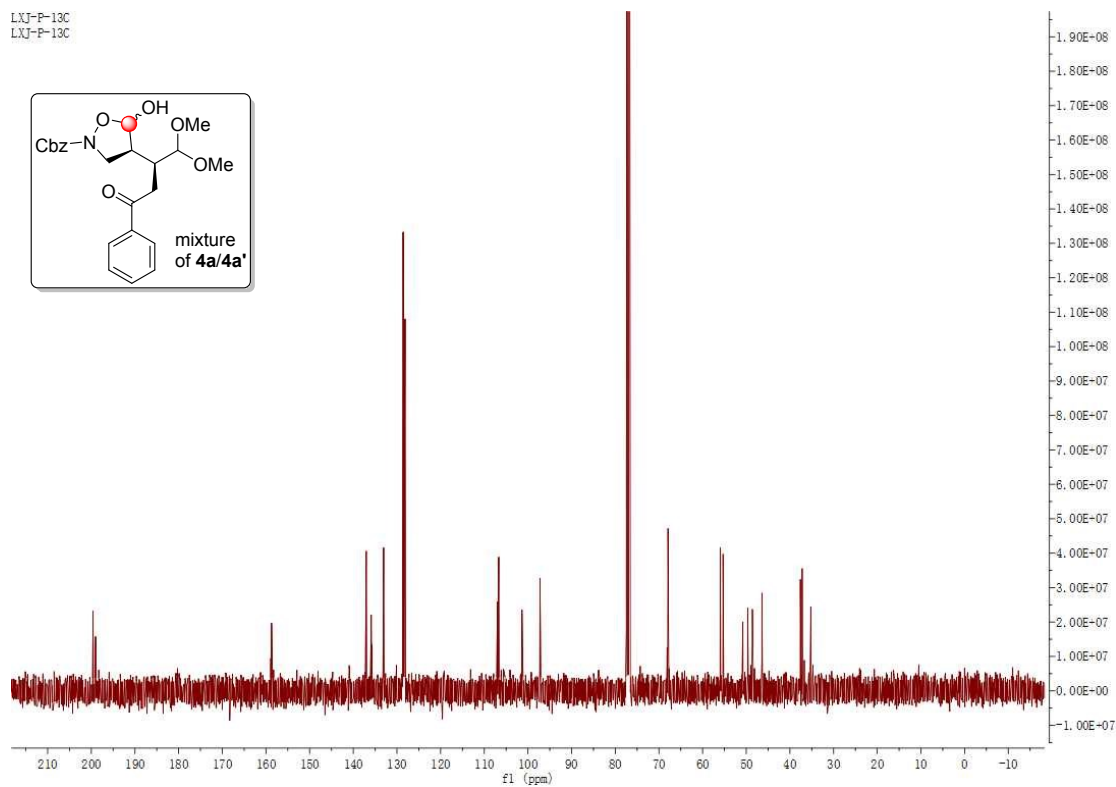

The  $^1\text{H}$  NMR spectrum of 5a (400 MHz,  $\text{CDCl}_3$ )

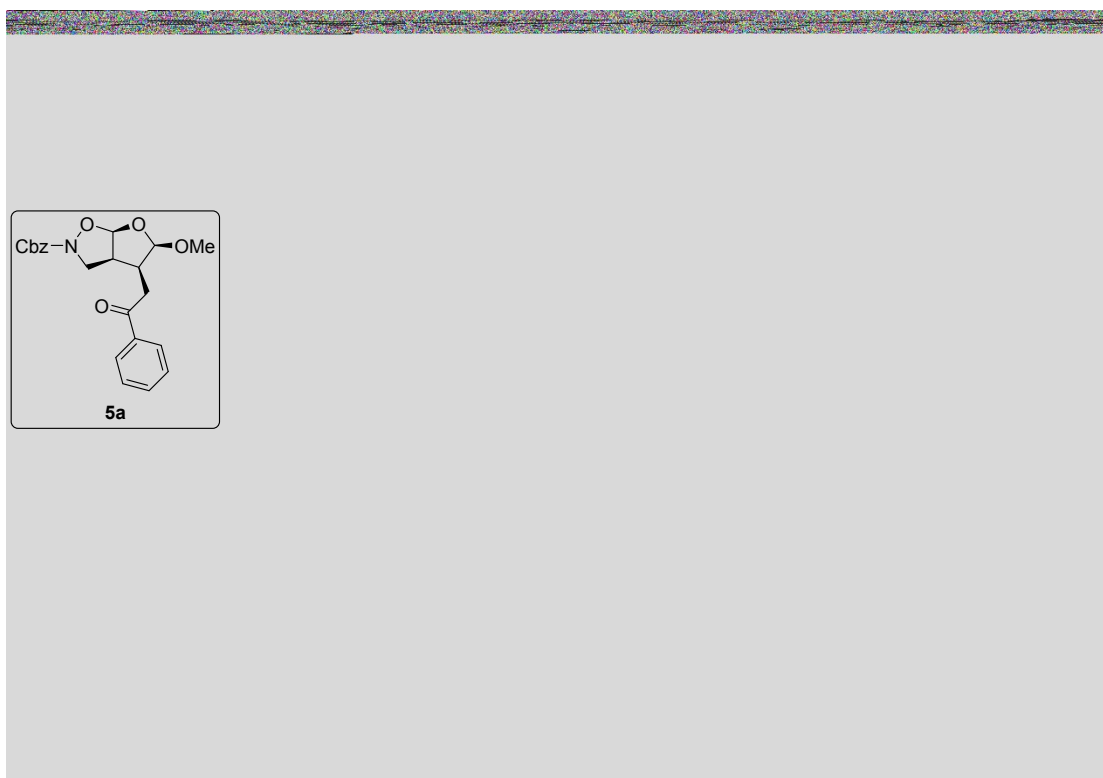

The  $^{13}\text{C}$  NMR spectrum of 5a (125 MHz,  $\text{CDCl}_3$ )

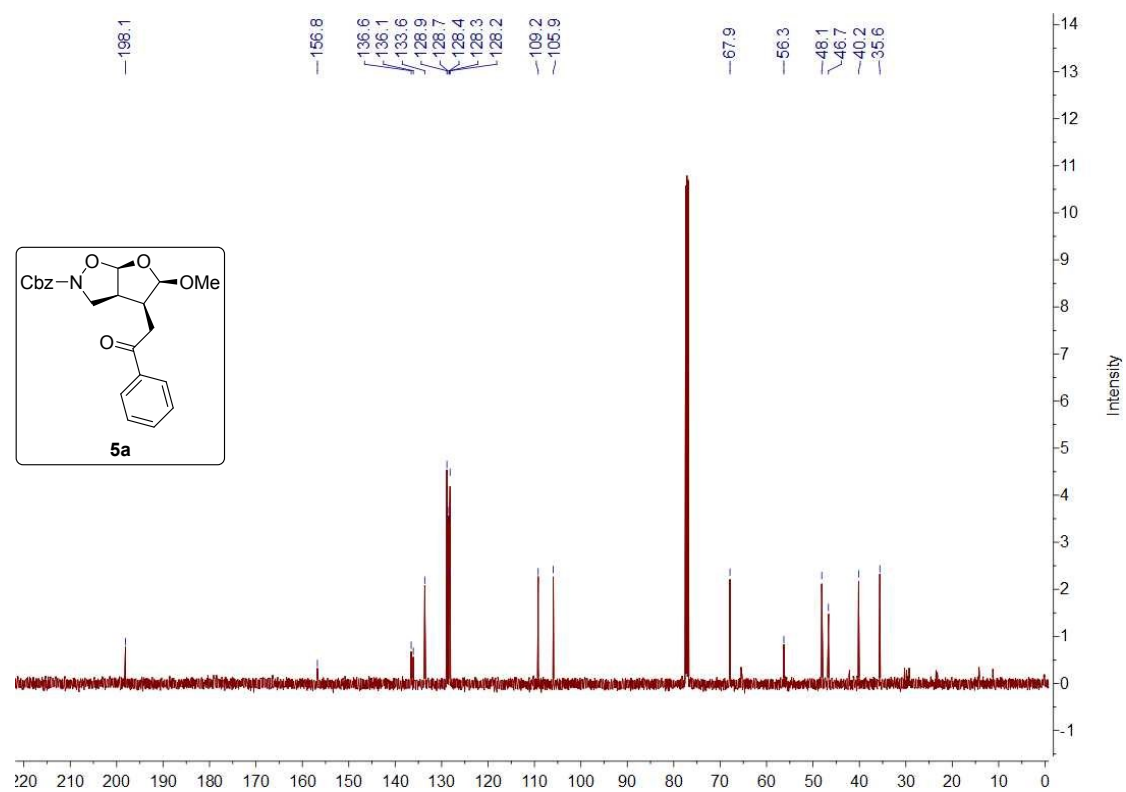

## The HPLC of racemic 5a

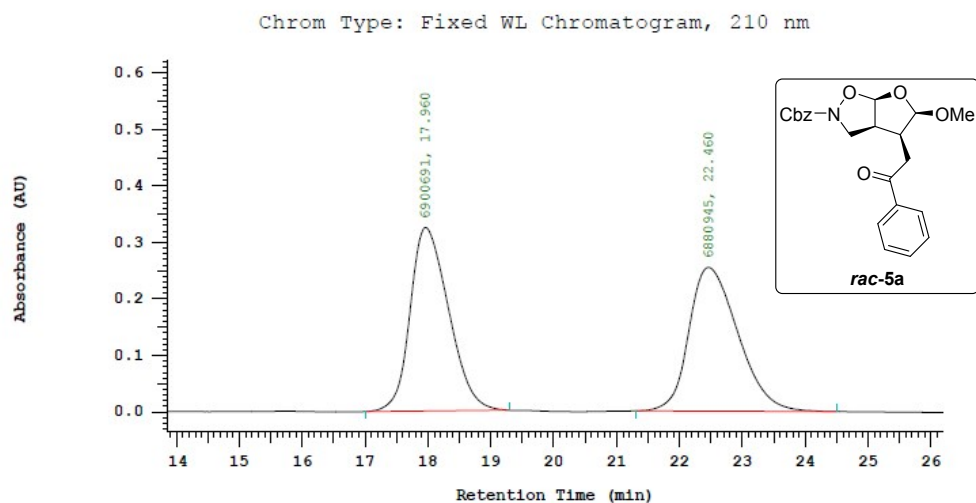

Chrom Type: Fixed WL Chromatogram, 210 nm  
Peak Quantitation: AREA  
Calculation Method: AREA%

| No. | RT     | Area     | Area %  | BC |
|-----|--------|----------|---------|----|
| 1   | 17.960 | 6900691  | 50.072  | BB |
| 2   | 22.460 | 6880945  | 49.928  | BB |
|     |        | 13781636 | 100.000 |    |

## The HPLC of chiral 5a

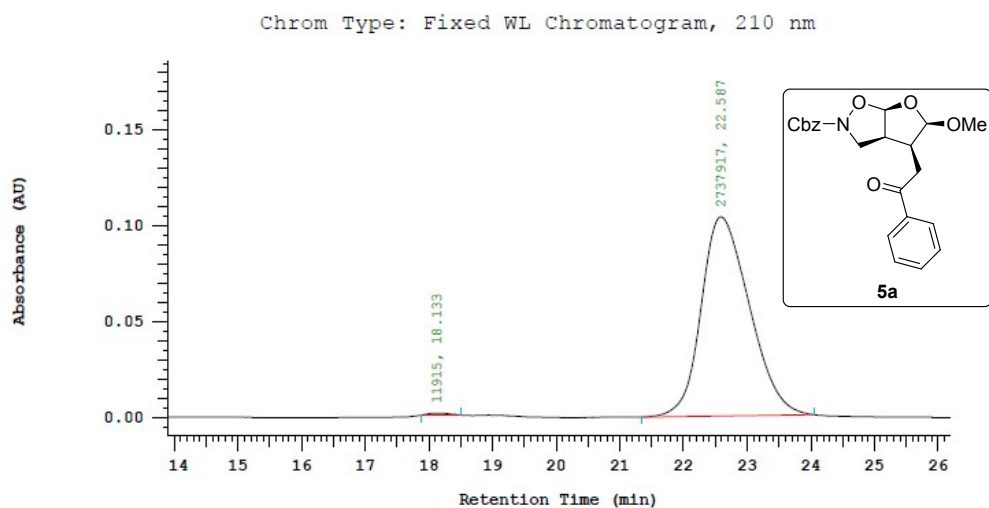

Chrom Type: Fixed WL Chromatogram, 210 nm  
Peak Quantitation: AREA  
Calculation Method: AREA%

| No. | RT     | Area    | Area %  | BC |
|-----|--------|---------|---------|----|
| 1   | 18.133 | 11915   | 0.433   | BB |
| 2   | 22.587 | 2737917 | 99.567  | BB |
|     |        | 2749832 | 100.000 |    |

The  $^1\text{H}$  NMR spectrum of **5b** (500 MHz,  $\text{CDCl}_3$ )

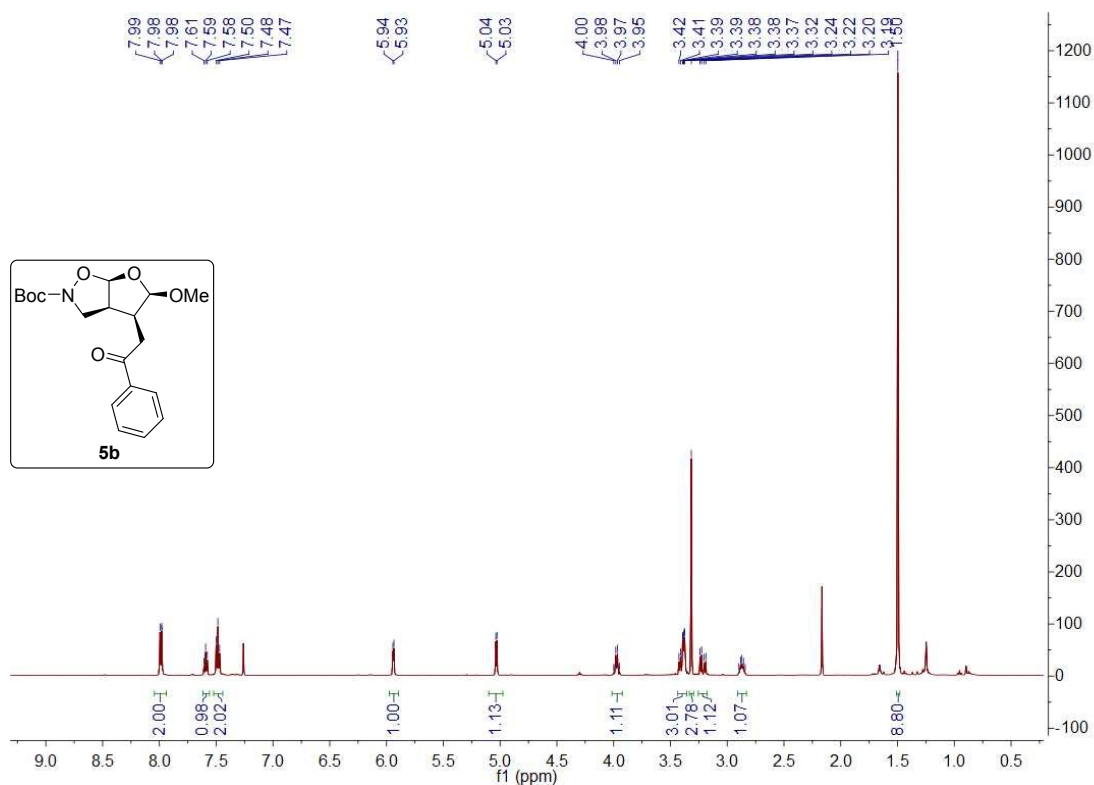

The  $^{13}\text{C}$  NMR spectrum of **5b** (125 MHz,  $\text{CDCl}_3$ )

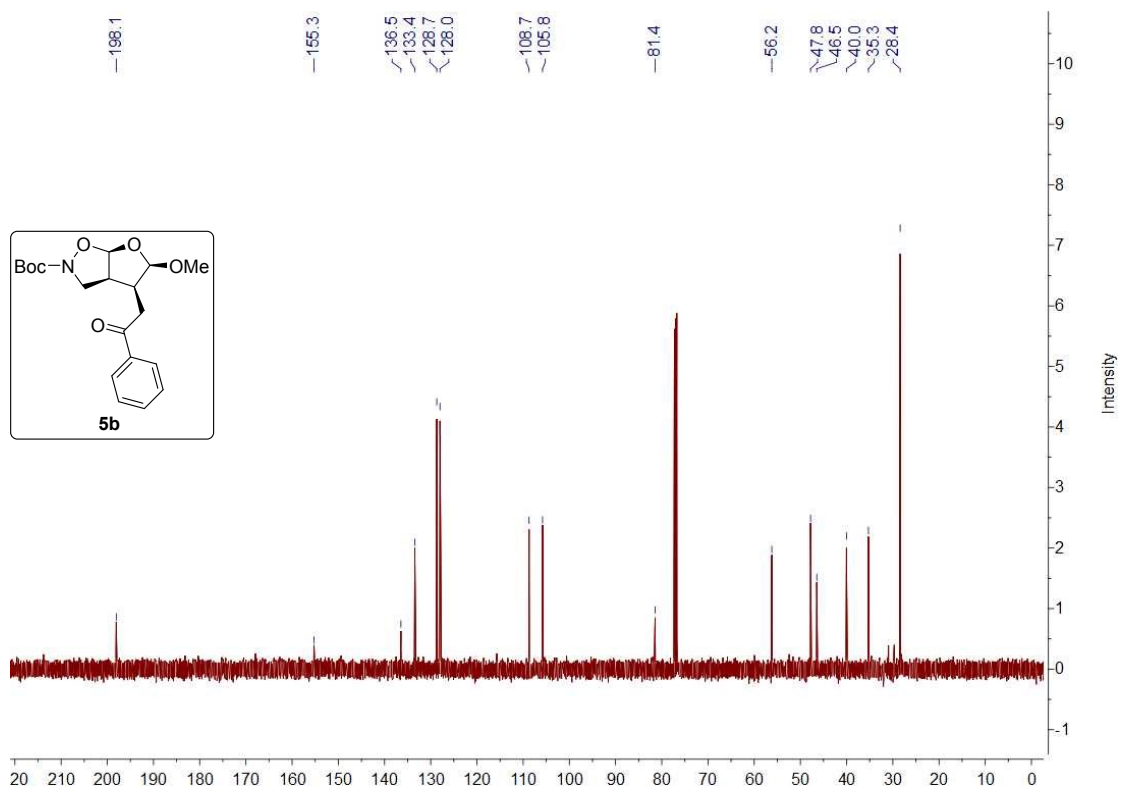



## The HPLC of racemic 5b

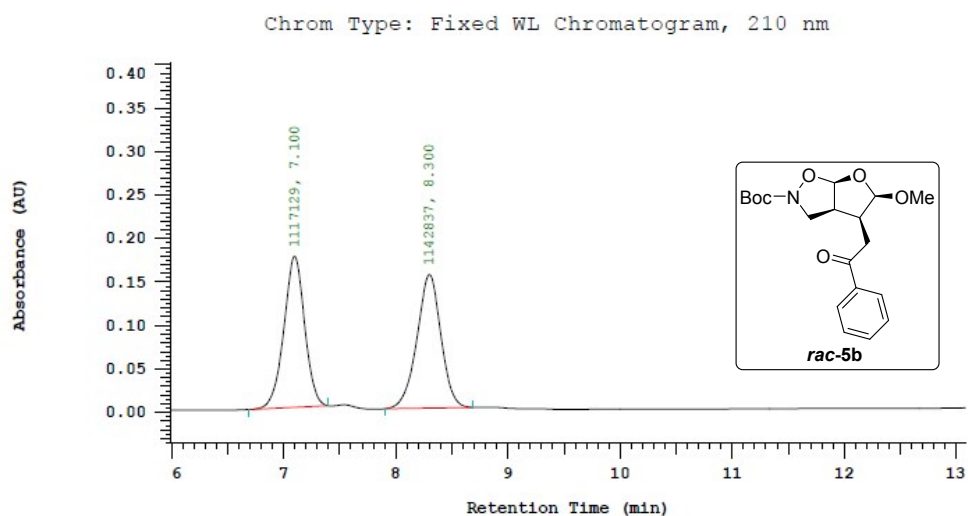

Chrom Type: Fixed WL Chromatogram, 210 nm  
Peak Quantitation: AREA  
Calculation Method: AREA%

| No. | RT    | Area    | Area %  | BC |
|-----|-------|---------|---------|----|
| 1   | 7.100 | 1117129 | 49.431  | BB |
| 2   | 8.300 | 1142837 | 50.569  | BB |
|     |       | 2259966 | 100.000 |    |

## The HPLC of chiral 5b

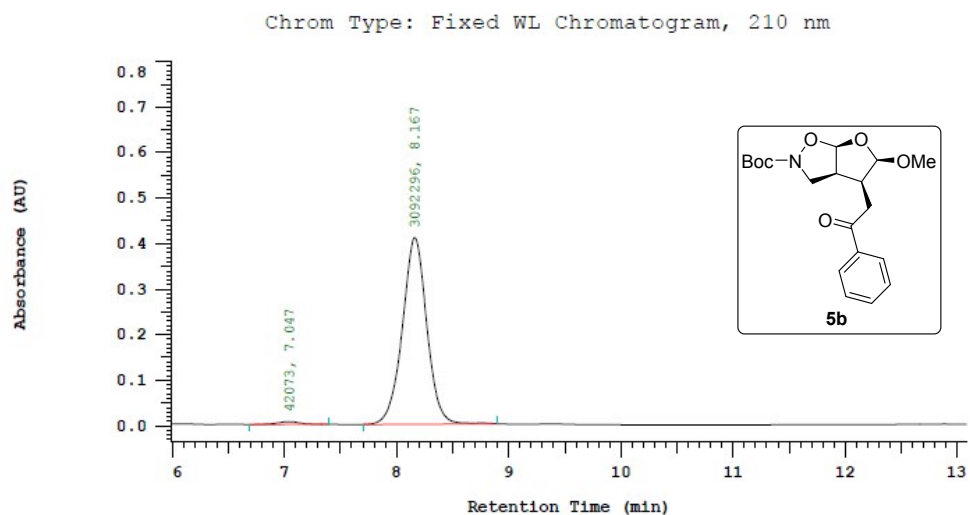

Chrom Type: Fixed WL Chromatogram, 210 nm  
Peak Quantitation: AREA  
Calculation Method: AREA%

| No. | RT    | Area    | Area %  | BC |
|-----|-------|---------|---------|----|
| 1   | 7.047 | 42073   | 1.342   | BB |
| 2   | 8.167 | 3092296 | 98.658  | BB |
|     |       | 3134369 | 100.000 |    |

## The HPLC of chiral 5b in transformation

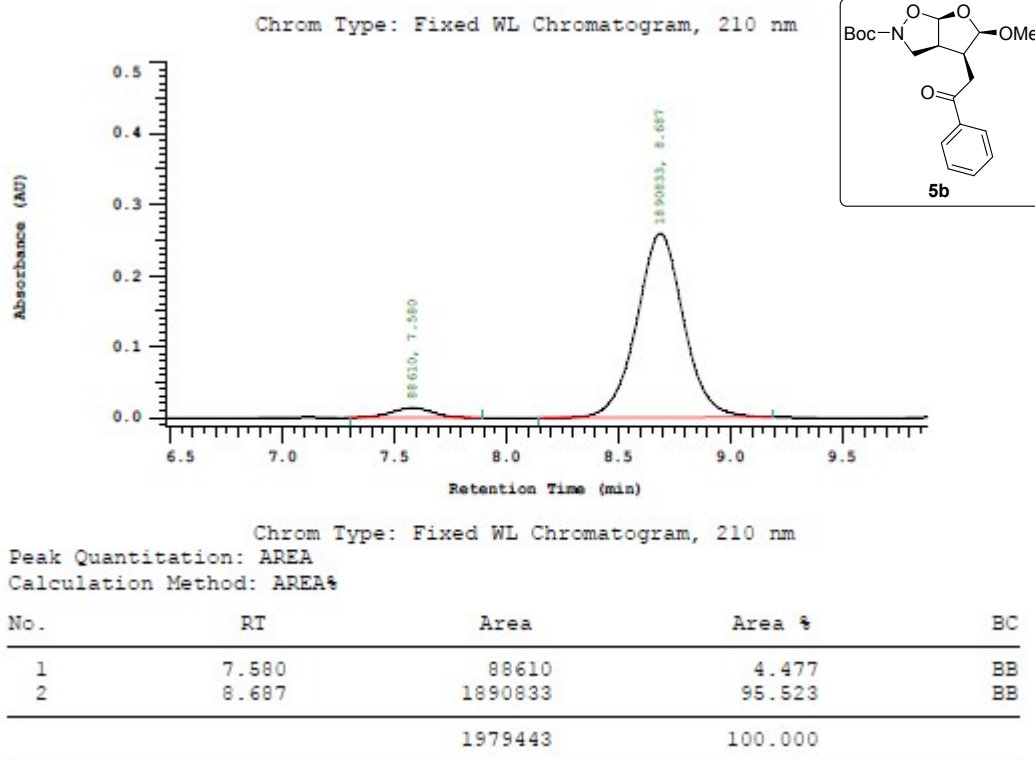

## The $^1\text{H}$ NMR spectrum of 5c (400 MHz, $\text{CDCl}_3$ )

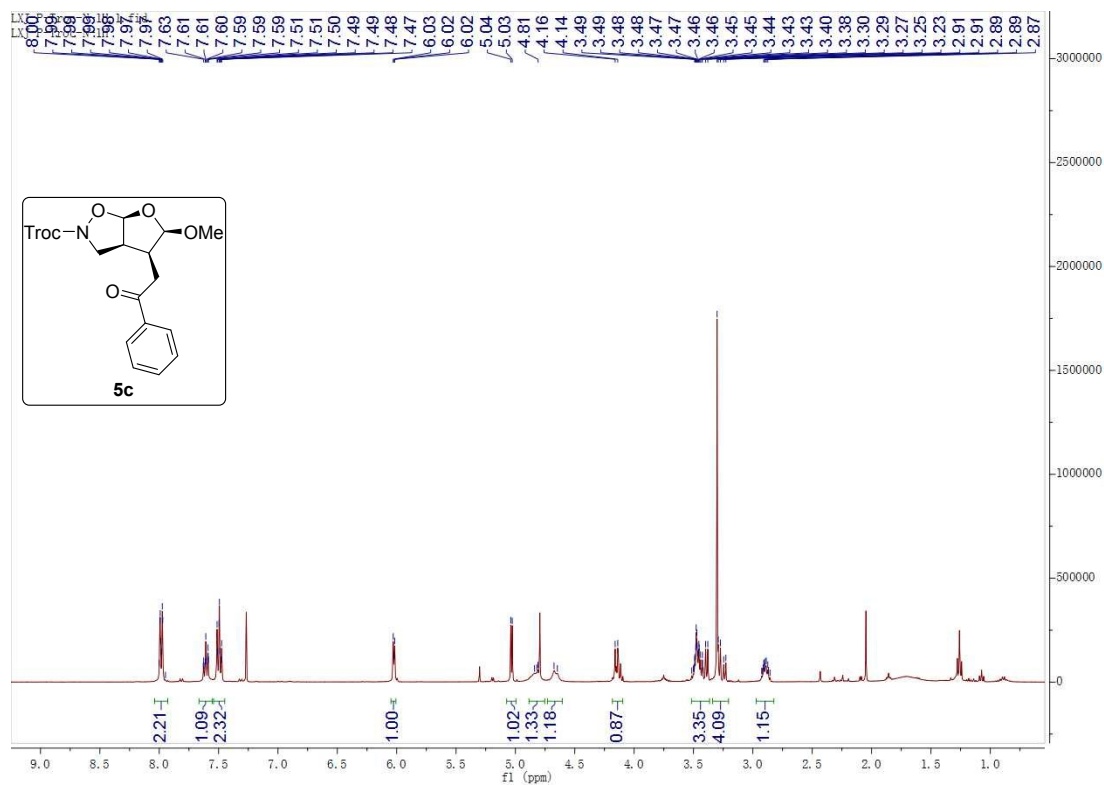

### The $^{13}\text{C}$ NMR spectrum of 5c (125 MHz, $\text{CDCl}_3$ )

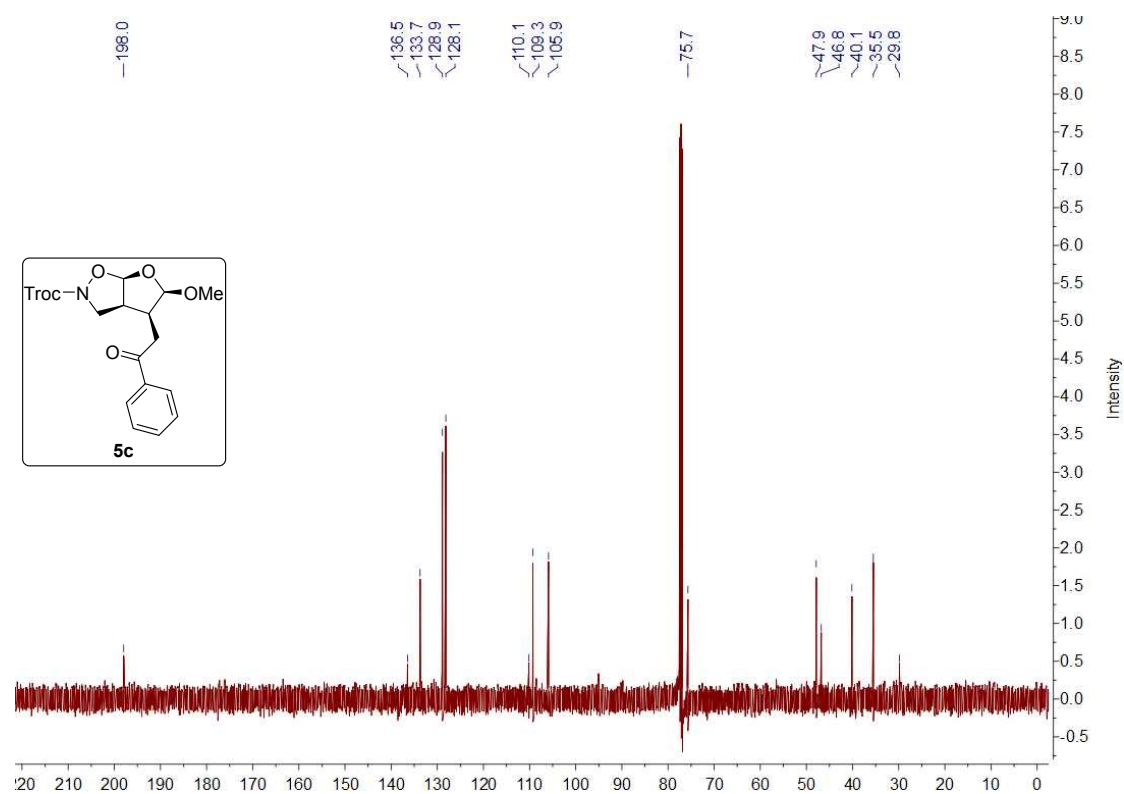

### The HPLC of racemic 5c

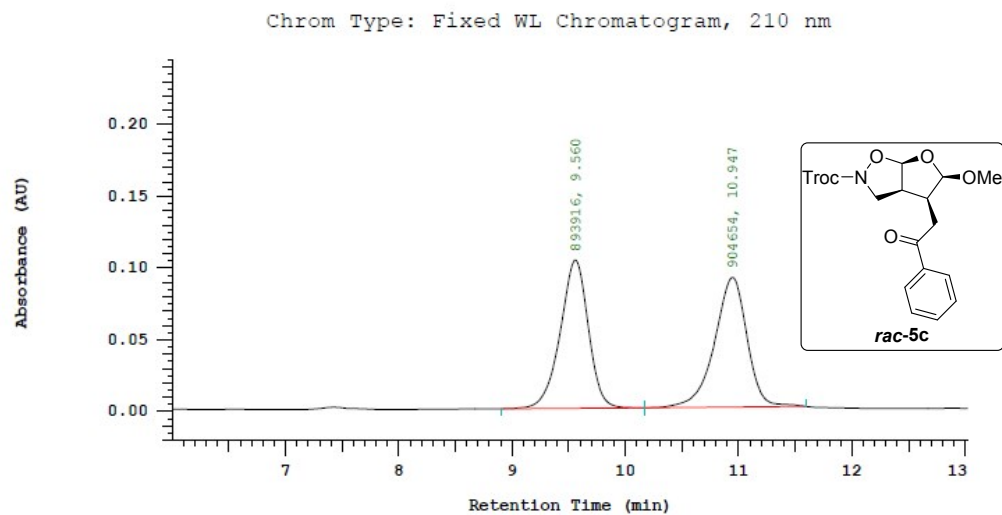

Chrom Type: Fixed WL Chromatogram, 210 nm  
 Peak Quantitation: AREA  
 Calculation Method: AREA%

| No. | RT     | Area    | Area %  | BC |
|-----|--------|---------|---------|----|
| 1   | 9.560  | 893916  | 49.701  | BB |
| 2   | 10.947 | 904654  | 50.299  | BB |
|     |        | 1798570 | 100.000 |    |

## The HPLC of chiral 5c

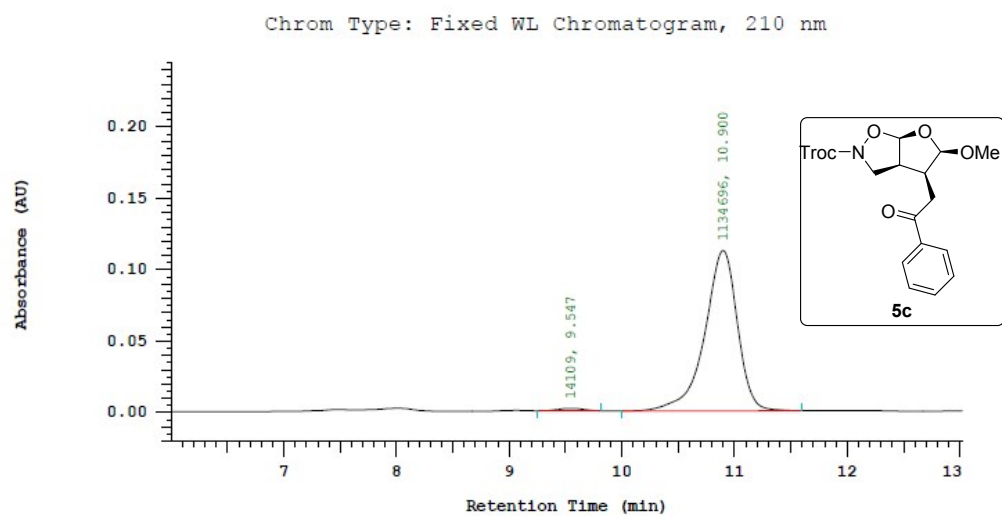

Chrom Type: Fixed WL Chromatogram, 210 nm

Peak Quantitation: AREA  
Calculation Method: AREA%

| No. | RT     | Area    | Area %  | BC |
|-----|--------|---------|---------|----|
| 1   | 9.547  | 14109   | 1.228   | BB |
| 2   | 10.900 | 1134696 | 98.772  | BB |
|     |        | 1148805 | 100.000 |    |

## The $^1\text{H}$ NMR spectrum of 5d (500 MHz, $\text{CDCl}_3$ )

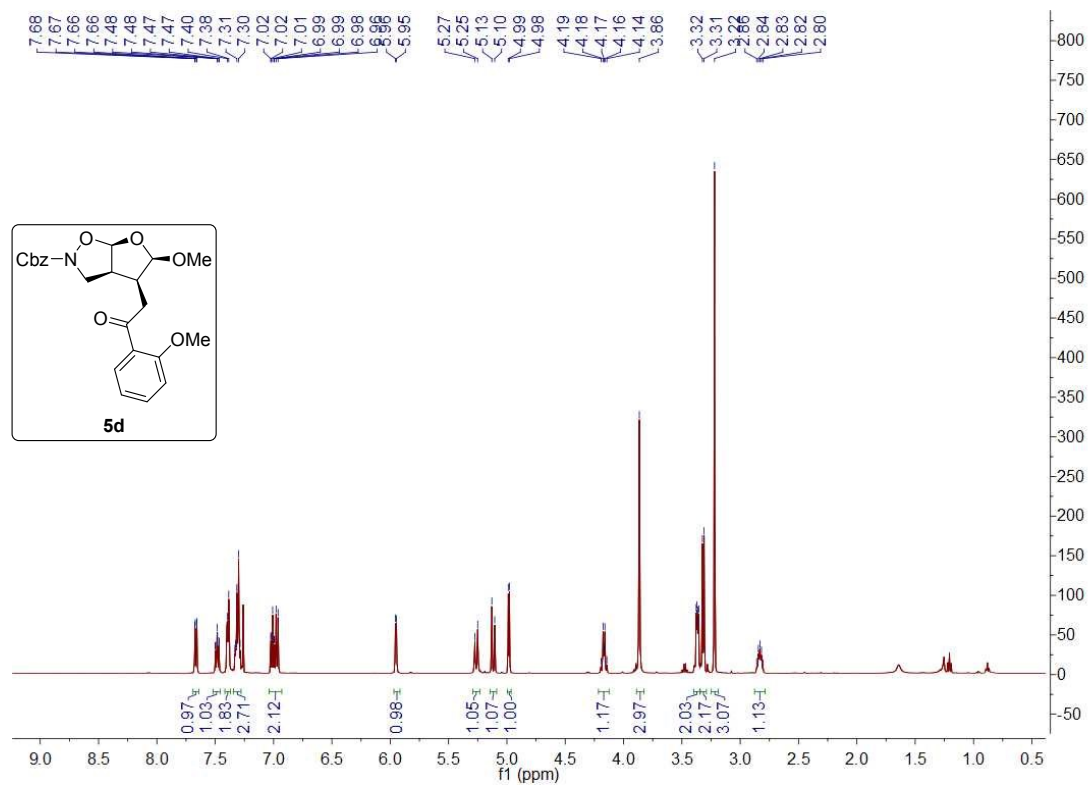

### The $^{13}\text{C}$ NMR spectrum of 5d (125 MHz, $\text{CDCl}_3$ )

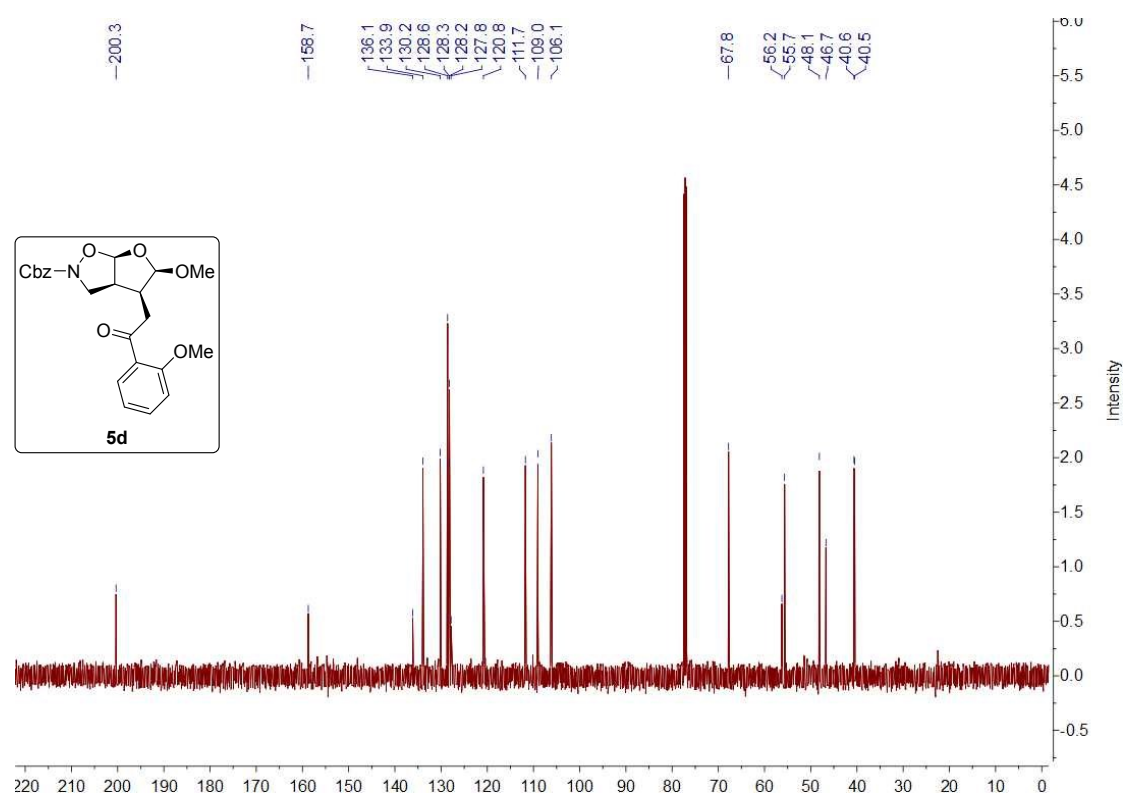

### The HPLC of racemic 5d

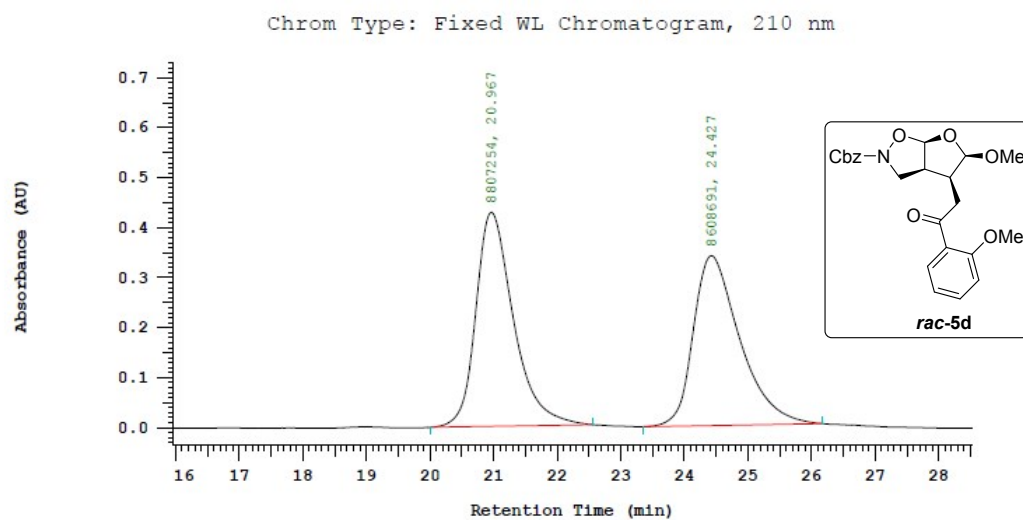

Chrom Type: Fixed WL Chromatogram, 210 nm

Peak Quantitation: AREA  
Calculation Method: AREA%

| No. | RT     | Area     | Area %  | BC |
|-----|--------|----------|---------|----|
| 1   | 20.967 | 8807254  | 50.570  | BB |
| 2   | 24.427 | 8608691  | 49.430  | BB |
|     |        | 17415945 | 100.000 |    |

## The HPLC of chiral 5d

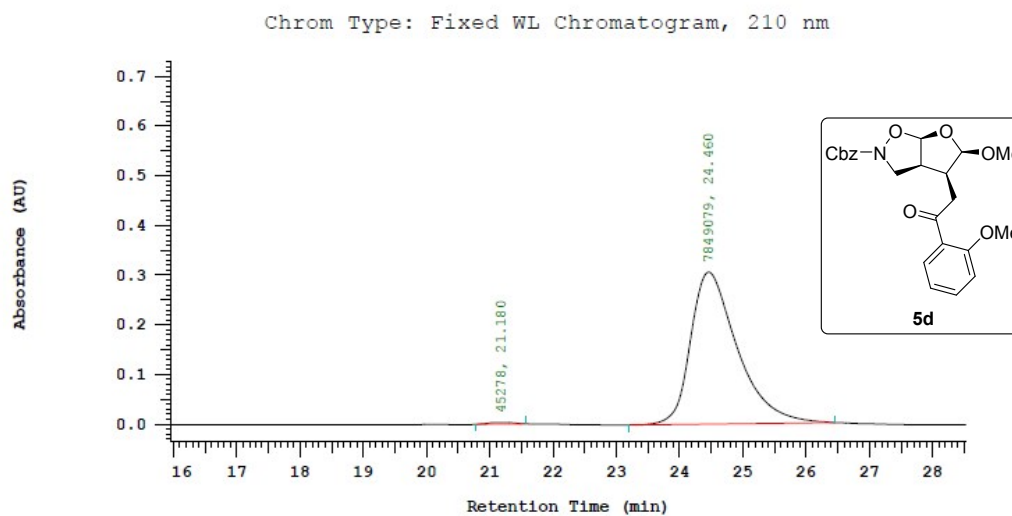

Chrom Type: Fixed WL Chromatogram, 210 nm

Peak Quantitation: AREA  
Calculation Method: AREA%

| No. | RT     | Area    | Area %  | BC |
|-----|--------|---------|---------|----|
| 1   | 21.180 | 45278   | 0.574   | BB |
| 2   | 24.460 | 7849079 | 99.426  | BB |
|     |        | 7894357 | 100.000 |    |

## The <sup>1</sup>H NMR spectrum of 5e (400 MHz, CDCl<sub>3</sub>)

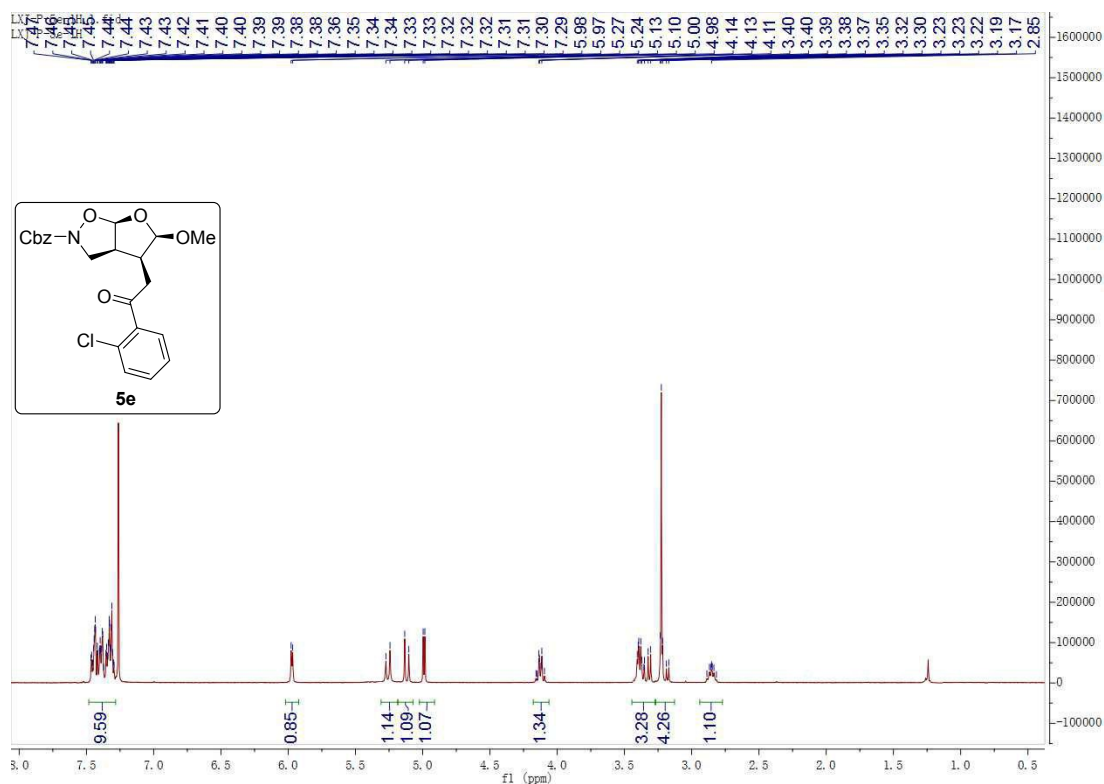

### The $^{13}\text{C}$ NMR spectrum of 5e (125 MHz, $\text{CDCl}_3$ )

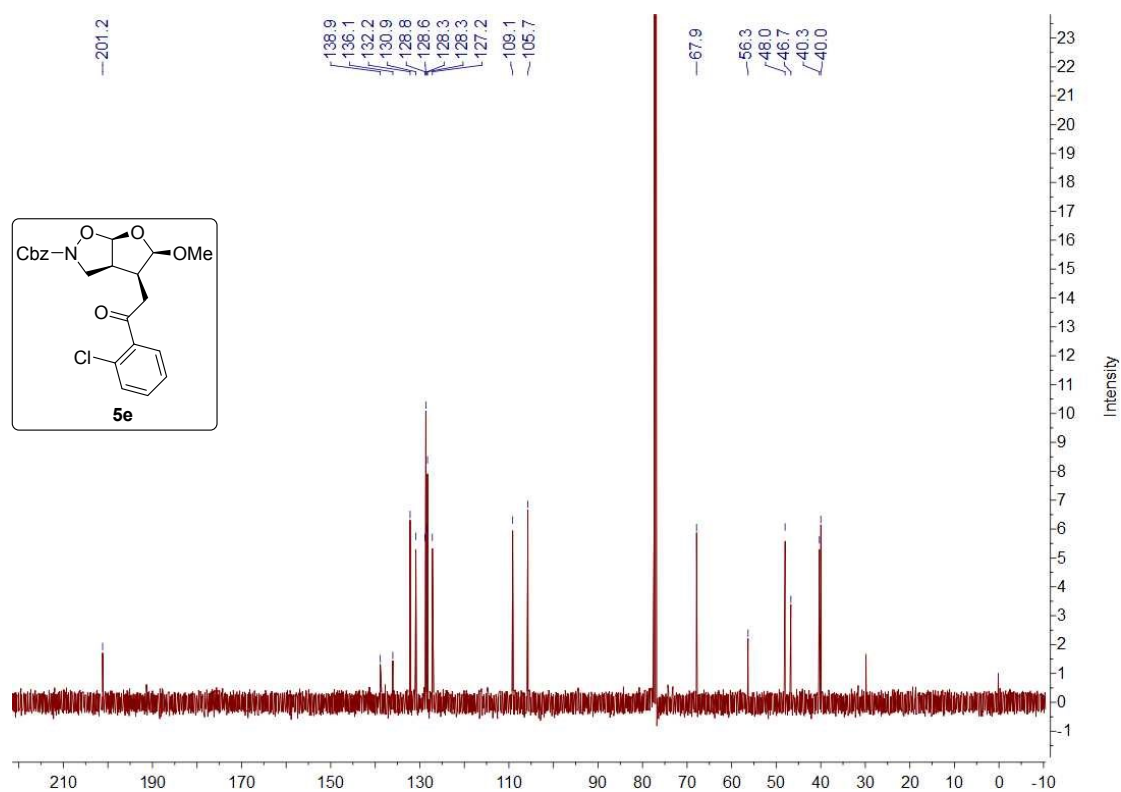

### The HPLC of racemic 5e

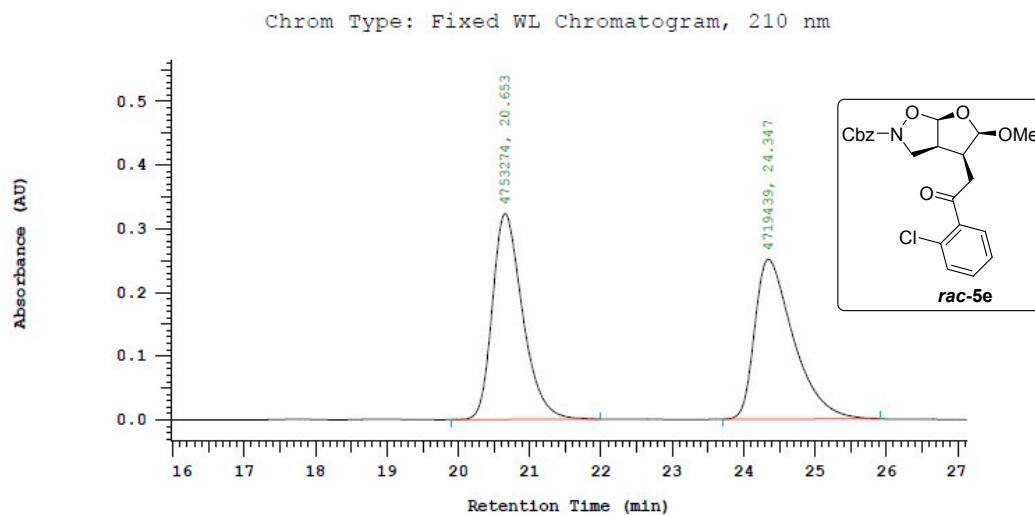

Chrom Type: Fixed WL Chromatogram, 210 nm  
 Peak Quantitation: AREA  
 Calculation Method: AREA%

| No. | RT     | Area    | Area %  | BC |
|-----|--------|---------|---------|----|
| 1   | 20.653 | 4753274 | 50.179  | BB |
| 2   | 24.347 | 4719439 | 49.821  | BB |
|     |        | 9472713 | 100.000 |    |



## The HPLC of chiral 5e

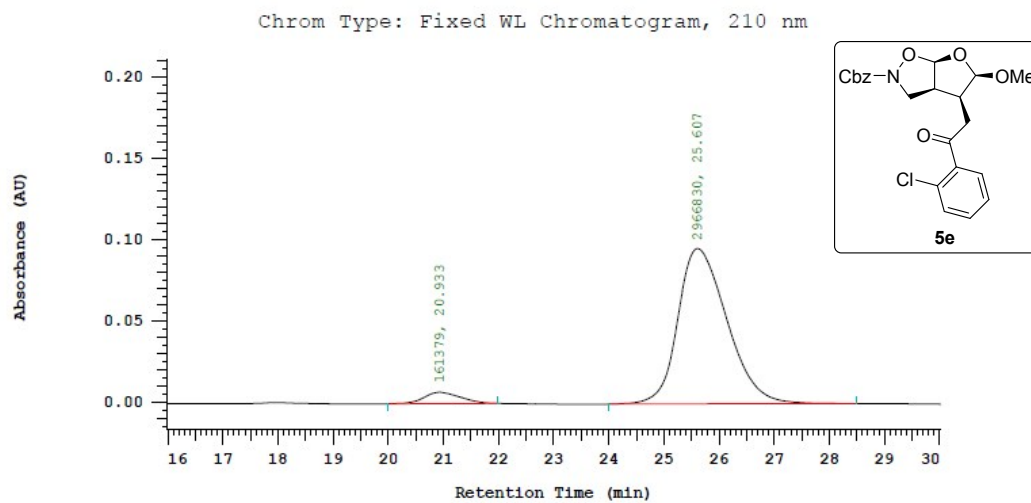

Chrom Type: Fixed WL Chromatogram, 210 nm  
 Peak Quantitation: AREA  
 Calculation Method: AREA%

| No. | RT     | Area    | Area %  | BC |
|-----|--------|---------|---------|----|
| 1   | 20.933 | 161379  | 5.159   | BB |
| 2   | 25.607 | 2966830 | 94.841  | BB |
|     |        | 3128209 | 100.000 |    |

## The $^1\text{H}$ NMR spectrum of 5f (400 MHz, $\text{CDCl}_3$ )

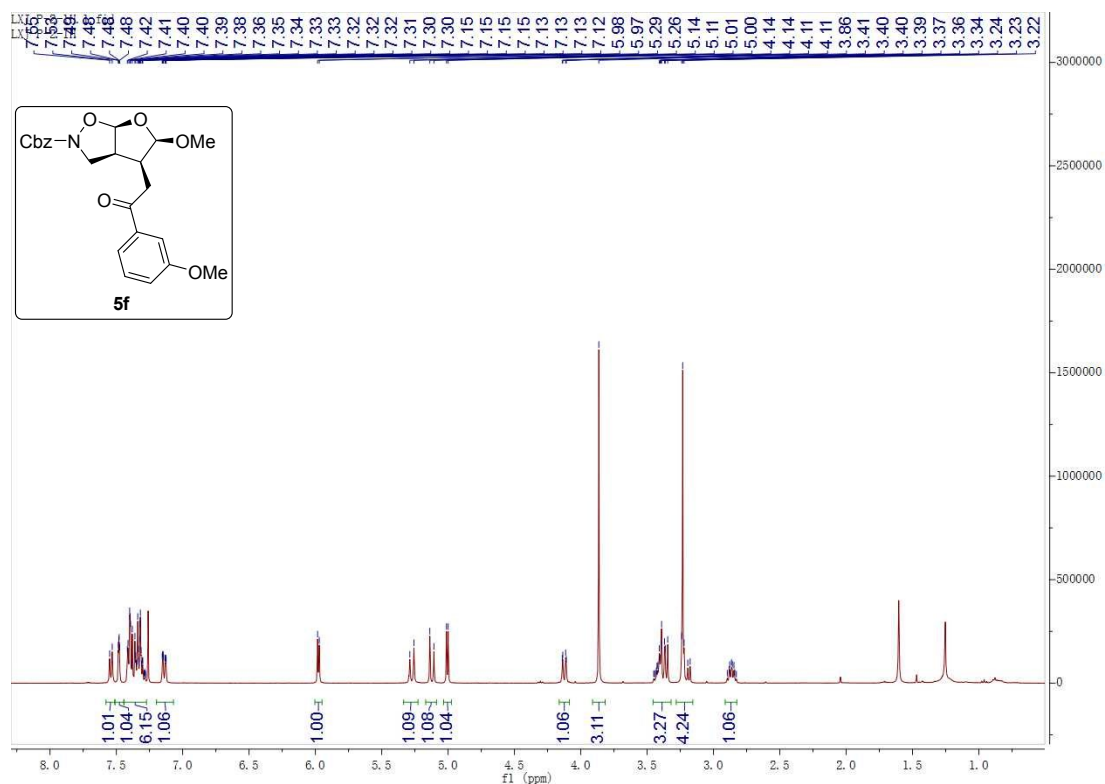



# The $^{13}\text{C}$ NMR spectrum of **5f** (125 MHz, $\text{CDCl}_3$ )

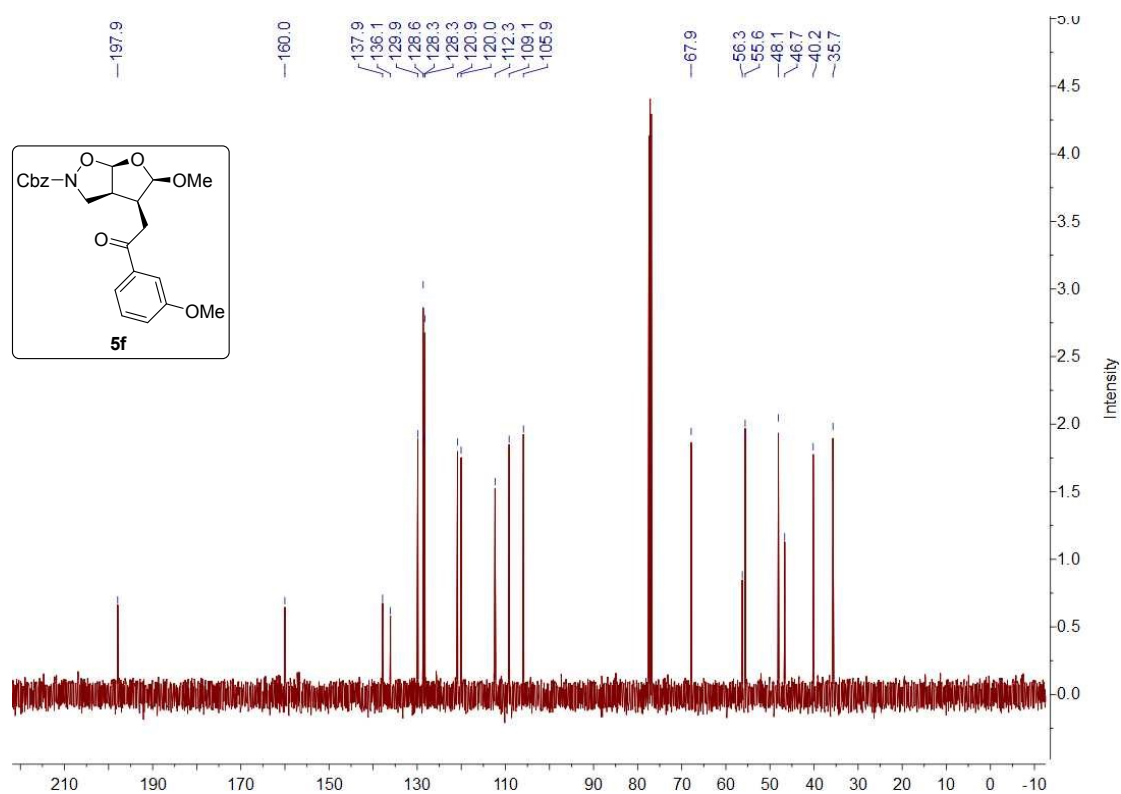

## The HPLC of racemic **5f**

Chrom Type: Fixed WL Chromatogram, 210 nm

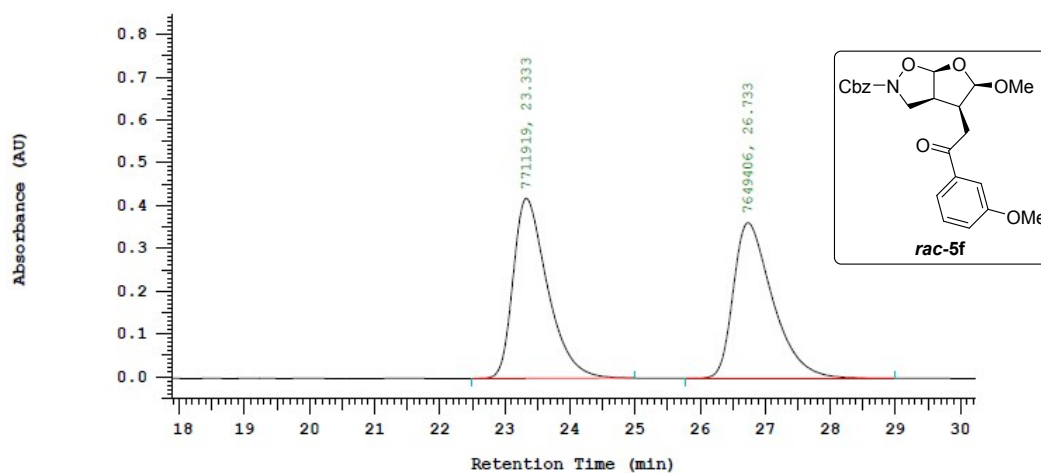

Chrom Type: Fixed WL Chromatogram, 210 nm

Peak Quantitation: AREA

Calculation Method: AREA%

| No. | RT     | Area     | Area %  | BC |
|-----|--------|----------|---------|----|
| 1   | 23.333 | 7711919  | 50.203  | BB |
| 2   | 26.733 | 7649406  | 49.797  | BB |
|     |        | 15361325 | 100.000 |    |

## The HPLC of chiral 5f

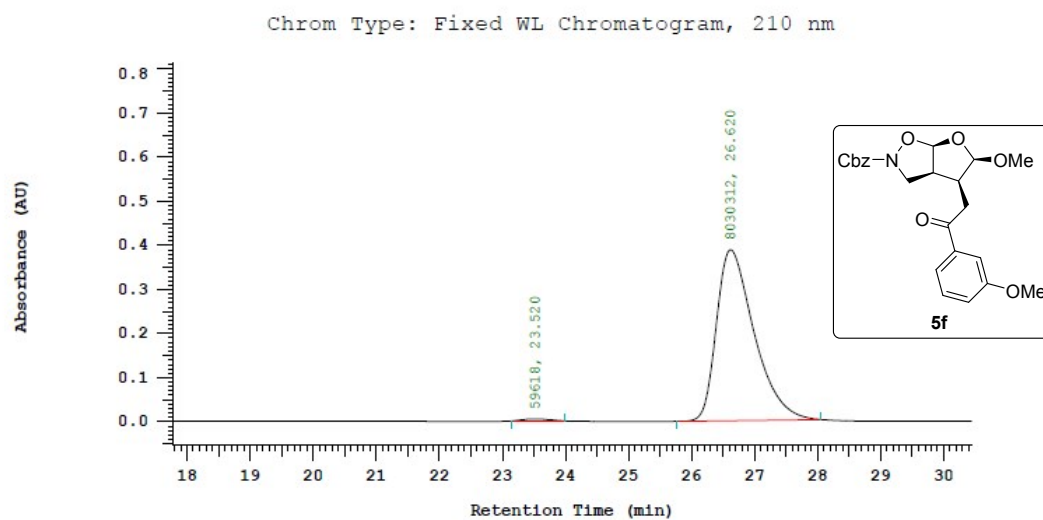

Chrom Type: Fixed WL Chromatogram, 210 nm

Peak Quantitation: AREA

Calculation Method: AREA%

| No. | RT     | Area    | Area %  | BC |
|-----|--------|---------|---------|----|
| 1   | 23.520 | 59618   | 0.737   | BB |
| 2   | 26.620 | 8030312 | 99.263  | BB |
|     |        | 8089930 | 100.000 |    |

## The <sup>1</sup>H NMR spectrum of 5g (500 MHz, CDCl<sub>3</sub>)

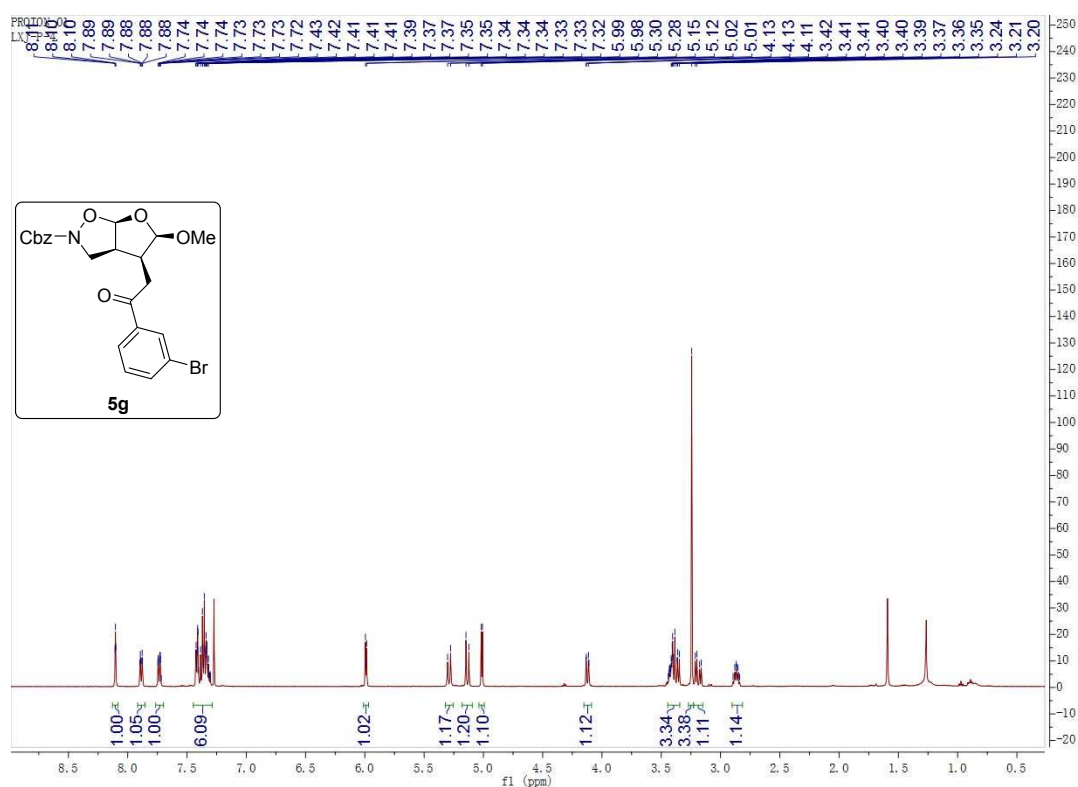

## The $^{13}\text{C}$ NMR spectrum of 5g (125 MHz, $\text{CDCl}_3$ )

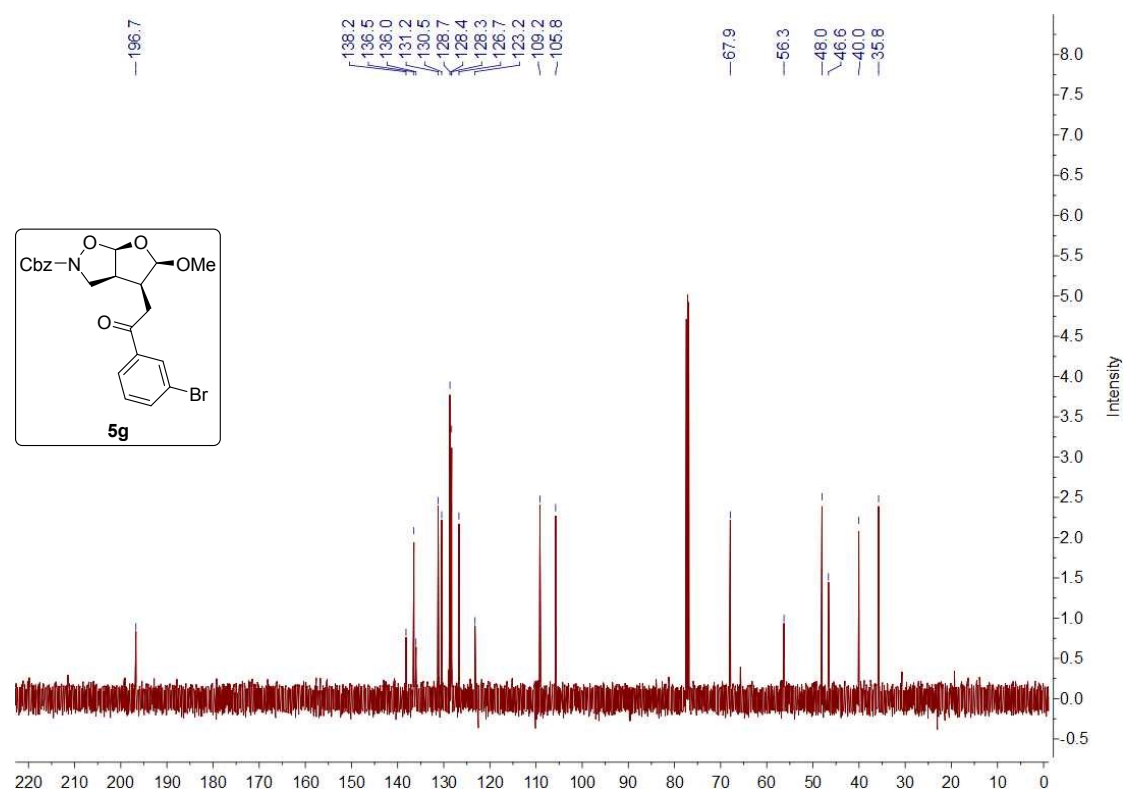

## The HPLC of racemic 5g

Chrom Type: Fixed WL Chromatogram, 210 nm

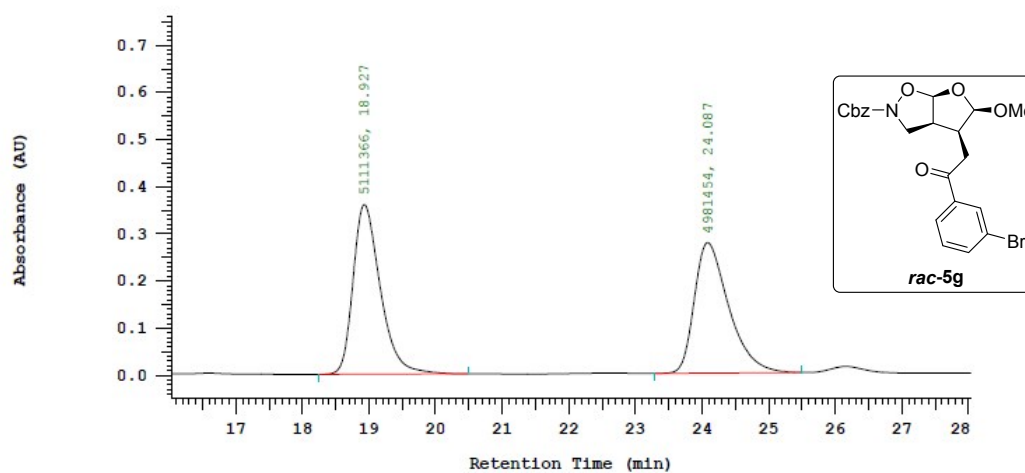

Chrom Type: Fixed WL Chromatogram, 210 nm

Peak Quantitation: AREA  
Calculation Method: AREA%

| No. | RT     | Area     | Area %  | BC |
|-----|--------|----------|---------|----|
| 1   | 18.927 | 5111366  | 50.644  | BB |
| 2   | 24.087 | 4981454  | 49.356  | BB |
|     |        | 10092820 | 100.000 |    |

## The HPLC of chiral 5g

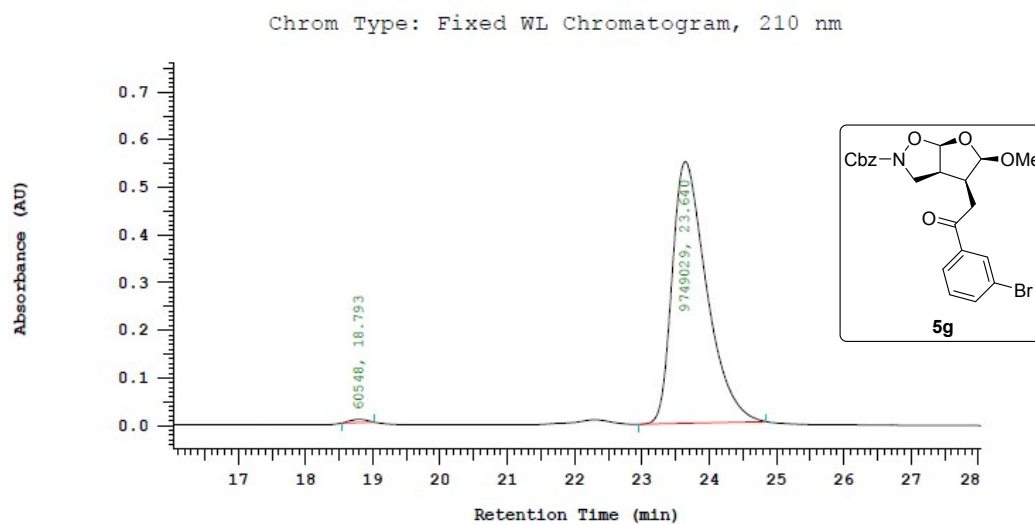

Chrom Type: Fixed WL Chromatogram, 210 nm

Peak Quantitation: AREA  
Calculation Method: AREA%

| No. | RT     | Area    | Area %  | BC |
|-----|--------|---------|---------|----|
| 1   | 18.793 | 60548   | 0.617   | BB |
| 2   | 23.640 | 9749029 | 99.383  | BB |
|     |        | 9809577 | 100.000 |    |

## The $^1\text{H}$ NMR spectrum of 5h (400 MHz, $\text{CDCl}_3$ )

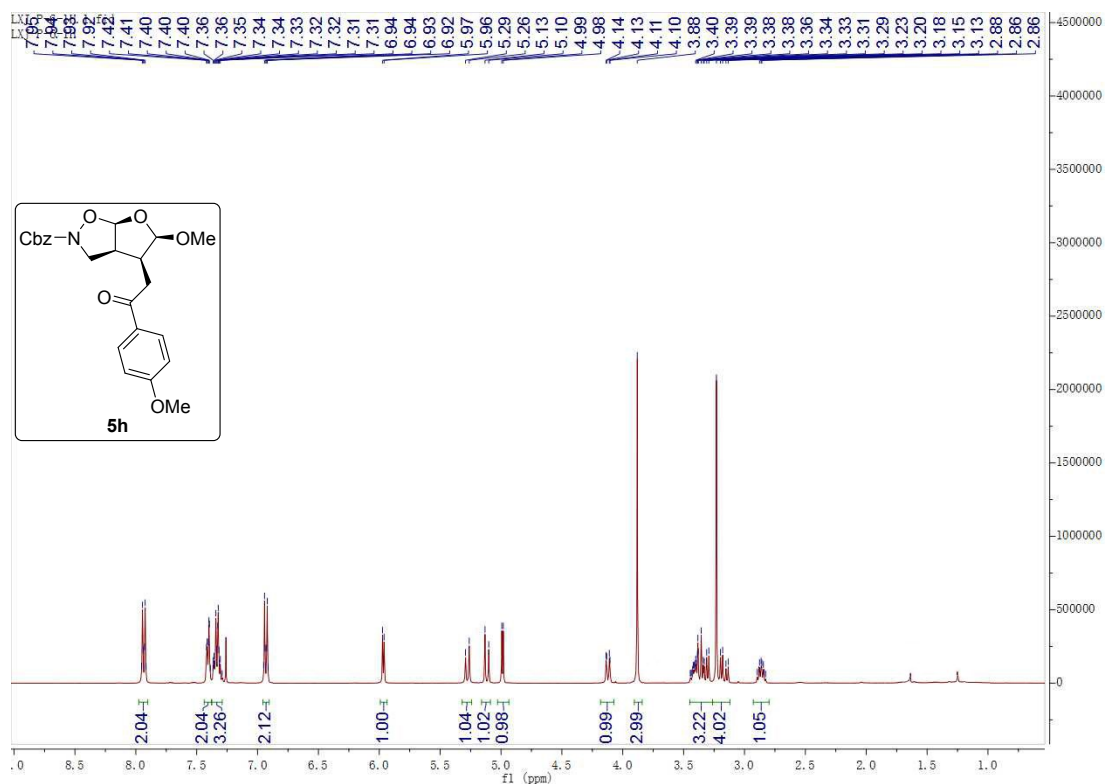

### The $^{13}\text{C}$ NMR spectrum of 5h (125 MHz, $\text{CDCl}_3$ )

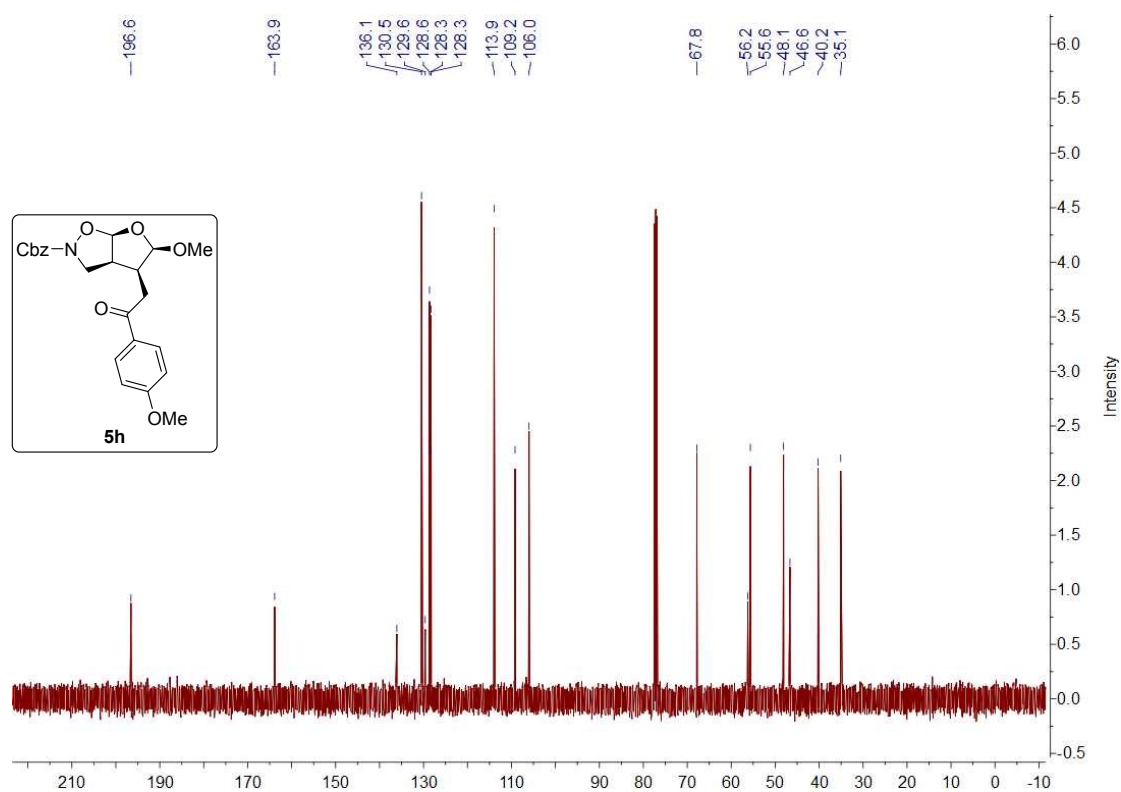

### The HPLC of racemic 5h

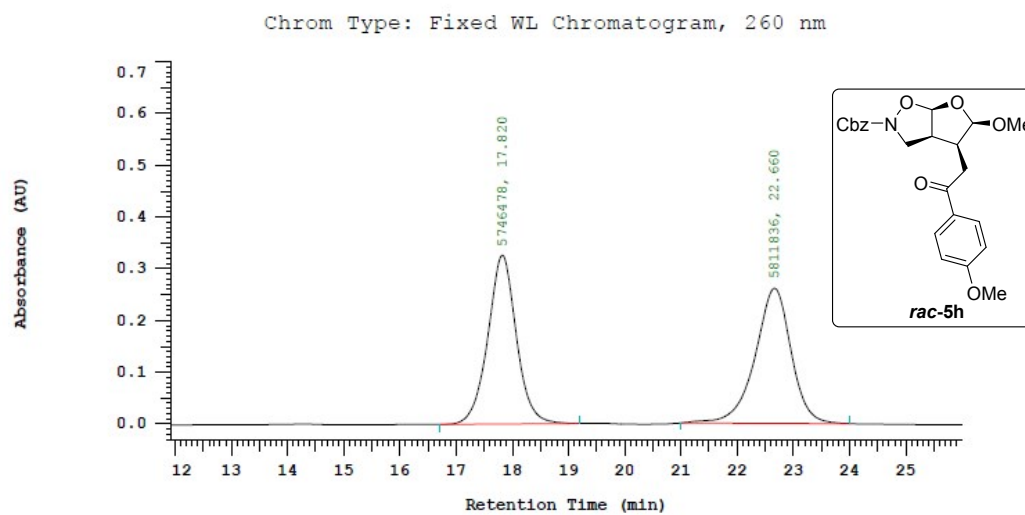

Chrom Type: Fixed WL Chromatogram, 260 nm  
 Peak Quantitation: AREA  
 Calculation Method: AREA%

| No. | RT     | Area     | Area %  | BC |
|-----|--------|----------|---------|----|
| 1   | 17.820 | 5746478  | 49.717  | BB |
| 2   | 22.660 | 5811836  | 50.283  | BB |
|     |        | 11558314 | 100.000 |    |

## The HPLC of chiral 5h

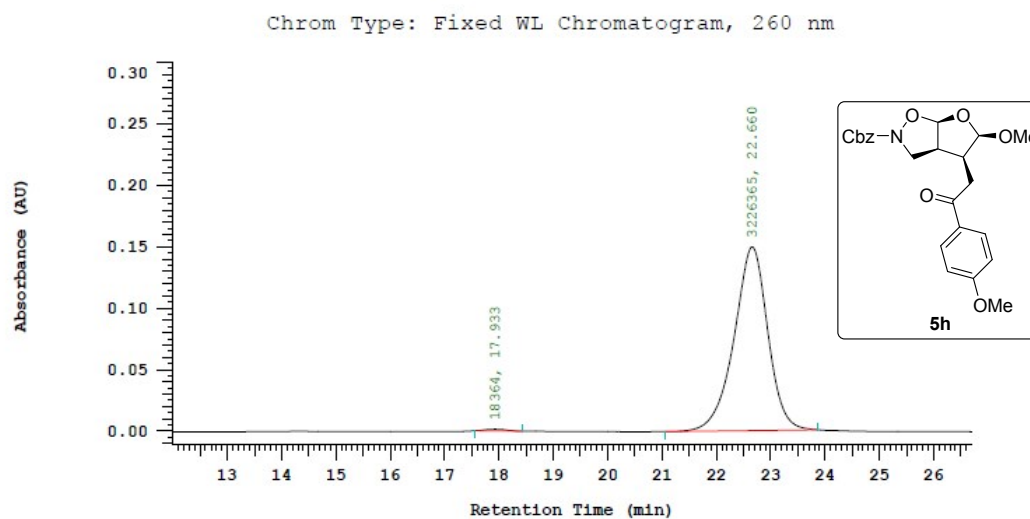

Chrom Type: Fixed WL Chromatogram, 260 nm

Peak Quantitation: AREA

Calculation Method: AREA%

| No. | RT     | Area    | Area %  | BC |
|-----|--------|---------|---------|----|
| 1   | 17.933 | 18364   | 0.566   | BB |
| 2   | 22.660 | 3226365 | 99.434  | BB |
|     |        | 3244729 | 100.000 |    |

## The <sup>1</sup>H NMR spectrum of 5i (400 MHz, CDCl<sub>3</sub>)

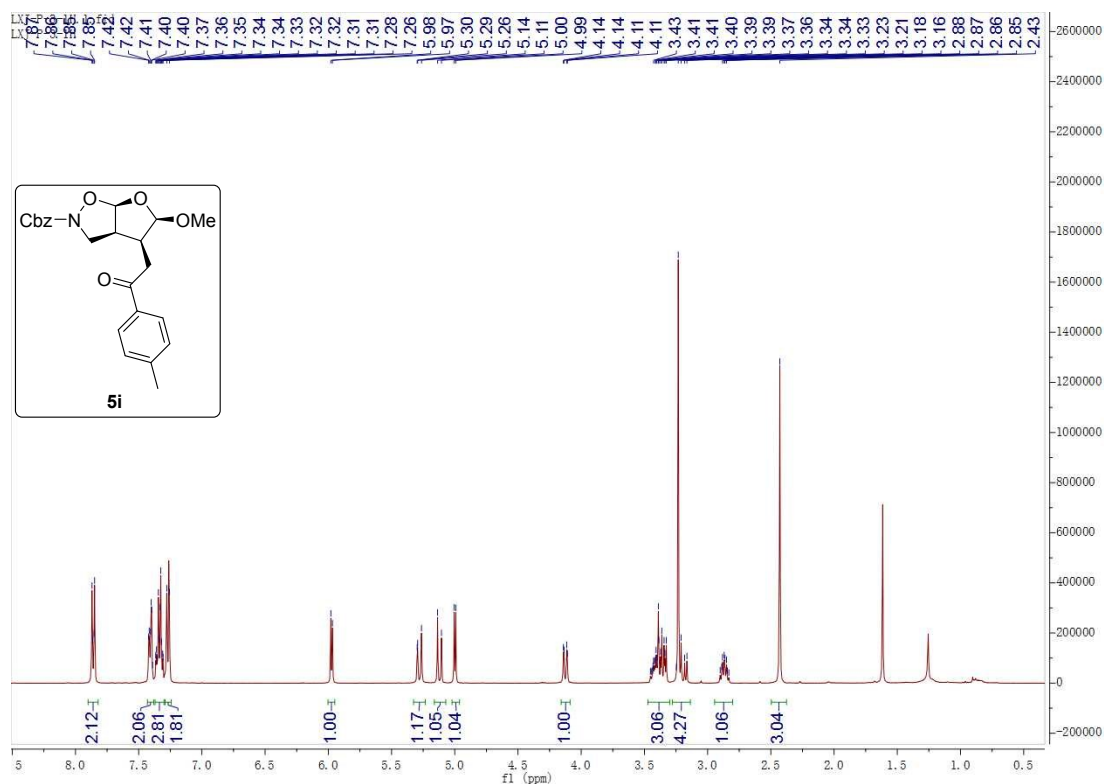

### The $^{13}\text{C}$ NMR spectrum of **5i** (125 MHz, $\text{CDCl}_3$ )

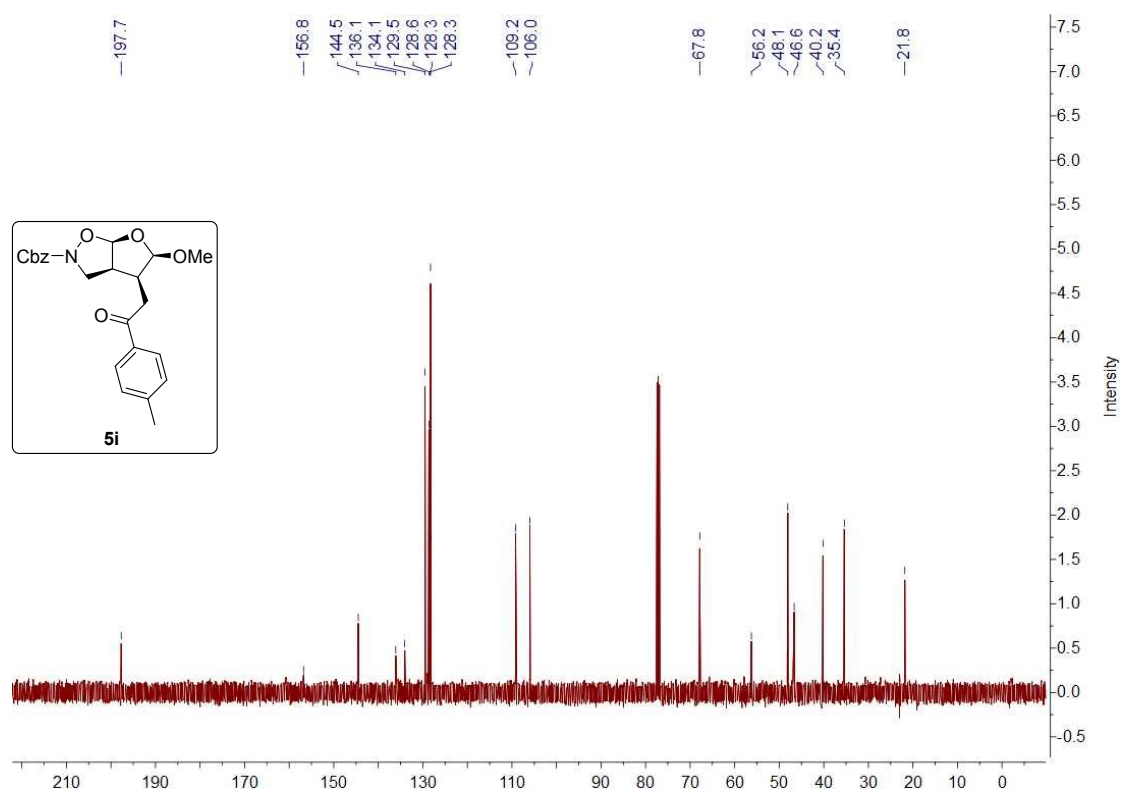

### The HPLC of racemic **5i**

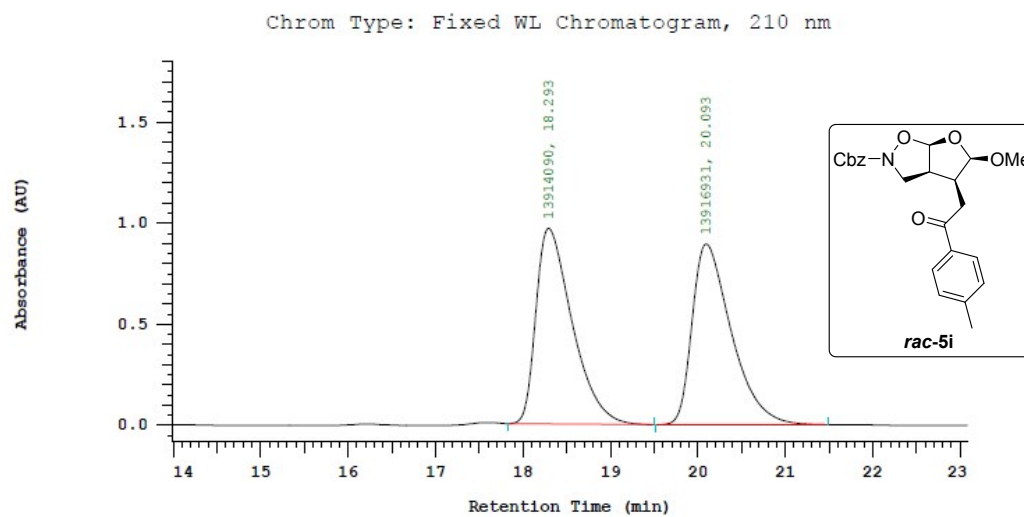

Chrom Type: Fixed WL Chromatogram, 210 nm  
 Peak Quantitation: AREA  
 Calculation Method: AREA%

| No.      | RT     | Area     | Area %  | BC |
|----------|--------|----------|---------|----|
| 1        | 18.293 | 13914090 | 49.995  | BB |
| 2        | 20.093 | 13916931 | 50.005  | BB |
| 27831021 |        |          | 100.000 |    |



## The HPLC of chiral 5i

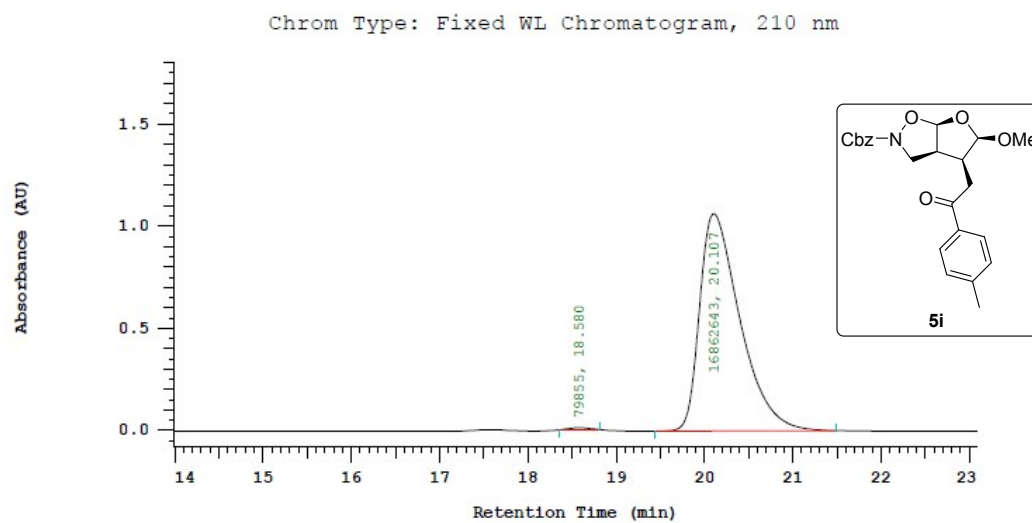

Chrom Type: Fixed WL Chromatogram, 210 nm

Peak Quantitation: AREA  
Calculation Method: AREA%

| No. | RT     | Area     | Area %  | BC |
|-----|--------|----------|---------|----|
| 1   | 18.580 | 79855    | 0.471   | BB |
| 2   | 20.107 | 16862643 | 99.529  | BB |
|     |        | 16942498 | 100.000 |    |

## The $^1\text{H}$ NMR spectrum of 5j (400 MHz, $\text{CDCl}_3$ )

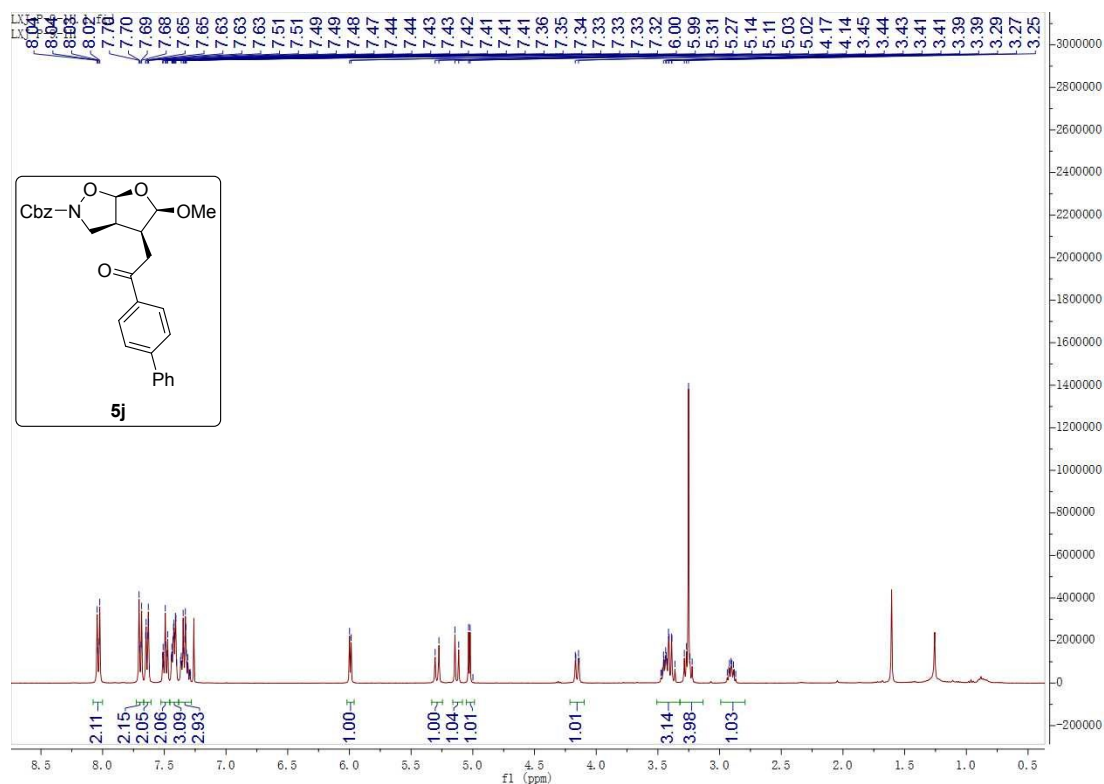



## The $^{13}\text{C}$ NMR spectrum of 5j (125 MHz, $\text{CDCl}_3$ )

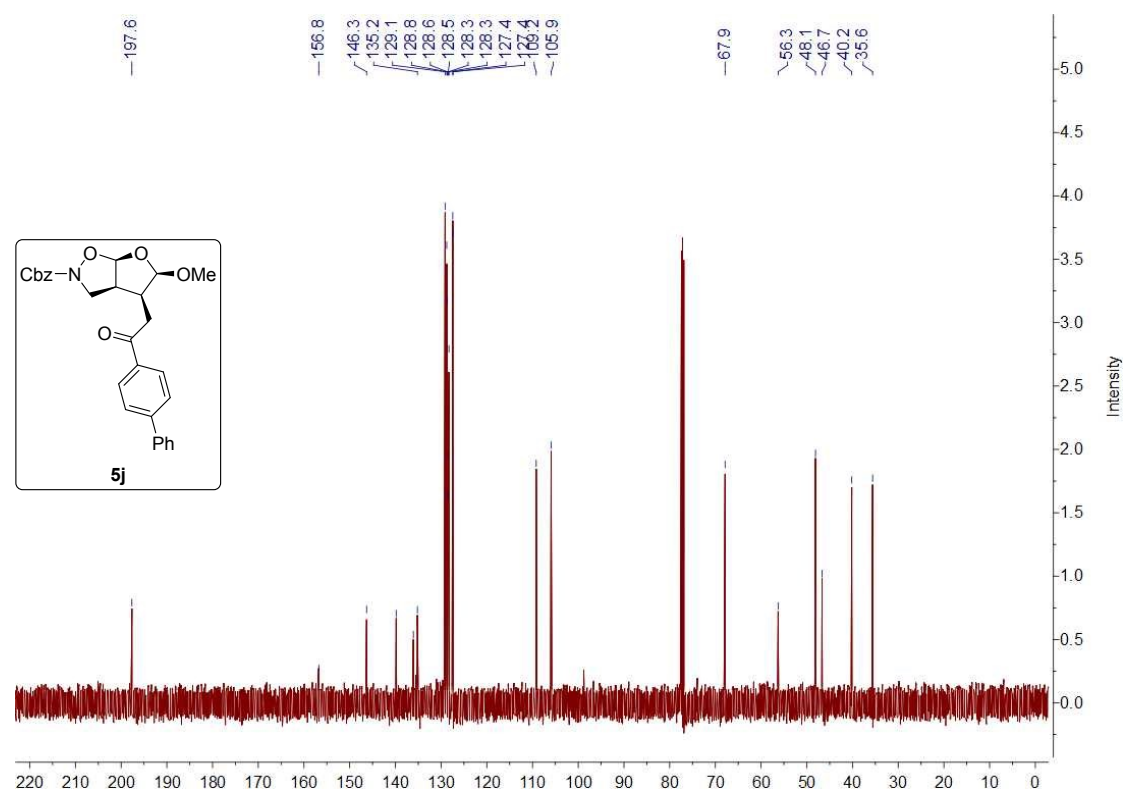

## The HPLC of racemic 5j

Chrom Type: Fixed WL Chromatogram, 210 nm

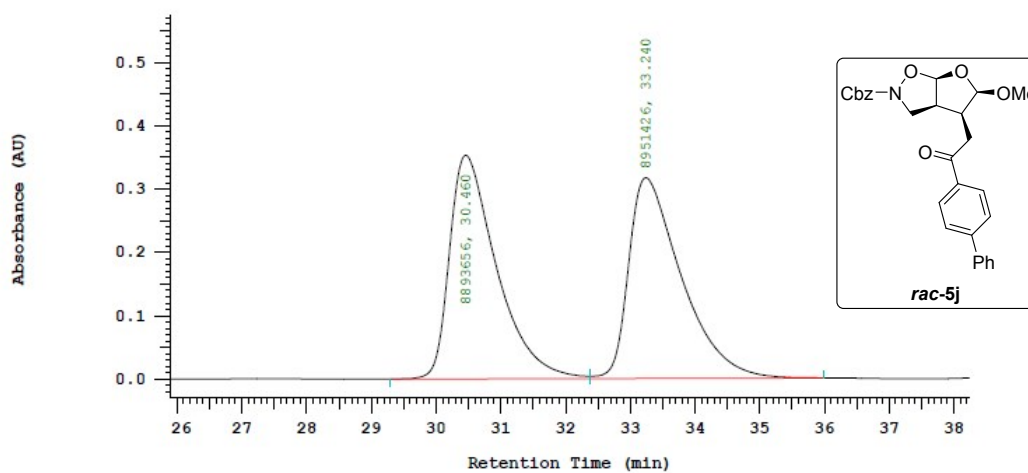

Chrom Type: Fixed WL Chromatogram, 210 nm

Peak Quantitation: AREA  
Calculation Method: AREA%

| No. | RT     | Area     | Area %  | BC |
|-----|--------|----------|---------|----|
| 1   | 30.460 | 8893656  | 49.838  | BV |
| 2   | 33.240 | 8951426  | 50.162  | VB |
|     |        | 17845082 | 100.000 |    |

## The HPLC of chiral 5j

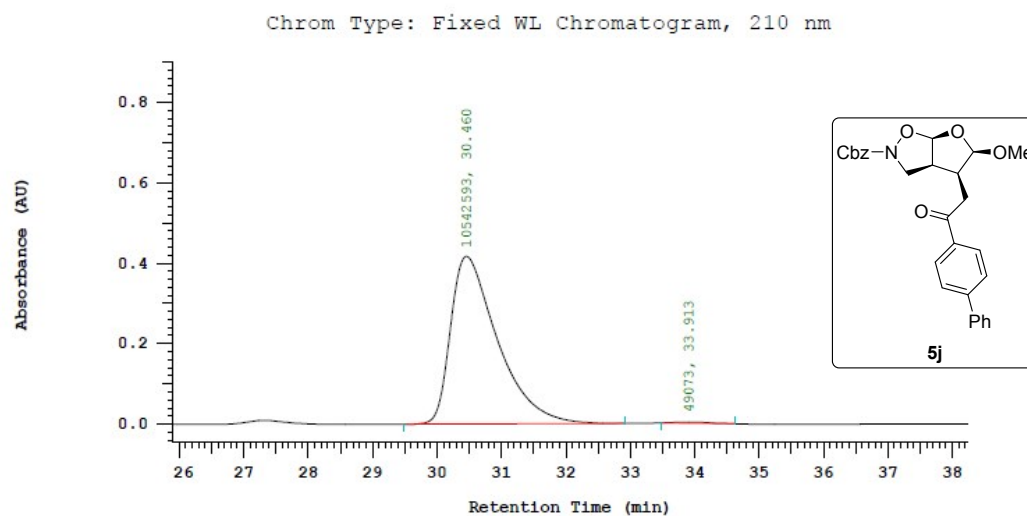

Chrom Type: Fixed WL Chromatogram, 210 nm

Peak Quantitation: AREA  
Calculation Method: AREA%

| No. | RT     | Area     | Area %  | BC |
|-----|--------|----------|---------|----|
| 1   | 30.460 | 10542593 | 99.537  | BB |
| 2   | 33.913 | 49073    | 0.463   | BB |
|     |        | 10591666 | 100.000 |    |

## The <sup>1</sup>H NMR spectrum of 5k (400 MHz, CDCl<sub>3</sub>)

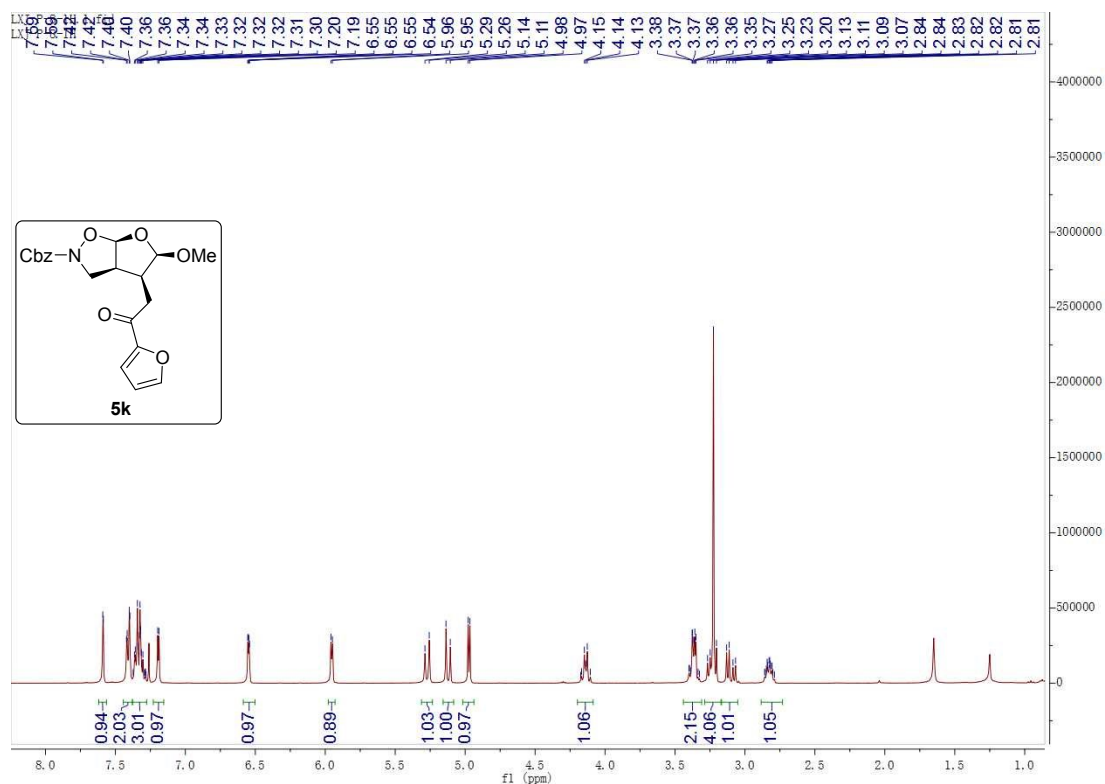

## The $^{13}\text{C}$ NMR spectrum of 5k (125 MHz, $\text{CDCl}_3$ )

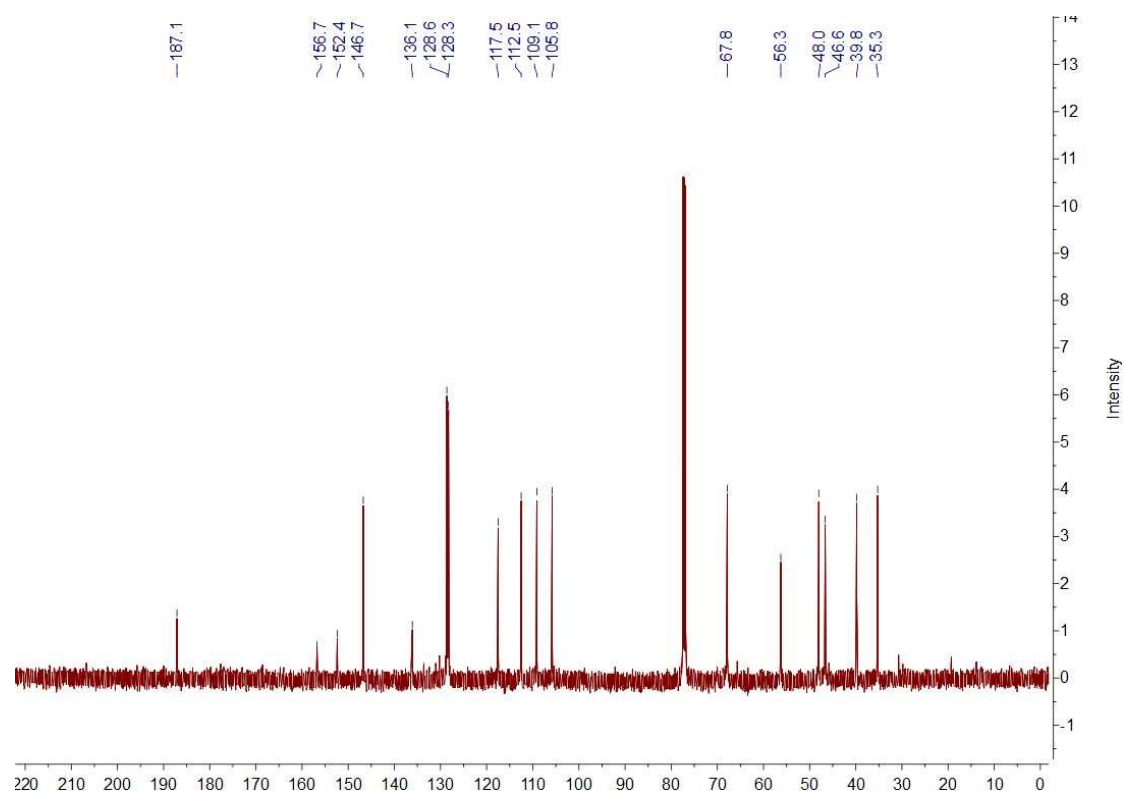

## The HPLC of racemic 5k

Chrom Type: Fixed WL Chromatogram, 210 nm

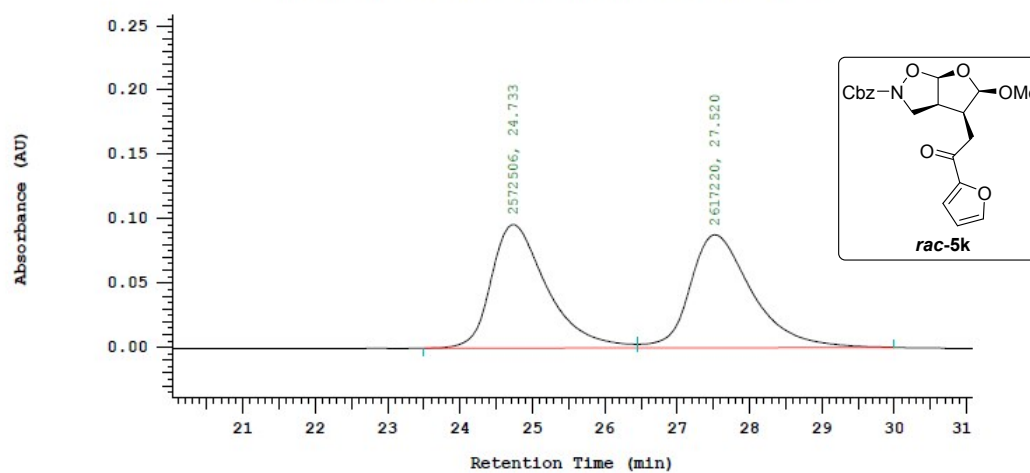

Chrom Type: Fixed WL Chromatogram, 210 nm

Peak Quantitation: AREA  
Calculation Method: AREA%

| No. | RT     | Area    | Area %  | BC |
|-----|--------|---------|---------|----|
| 1   | 24.733 | 2572506 | 49.569  | BV |
| 2   | 27.520 | 2617220 | 50.431  | VB |
|     |        | 5189726 | 100.000 |    |

## The HPLC of chiral 5k

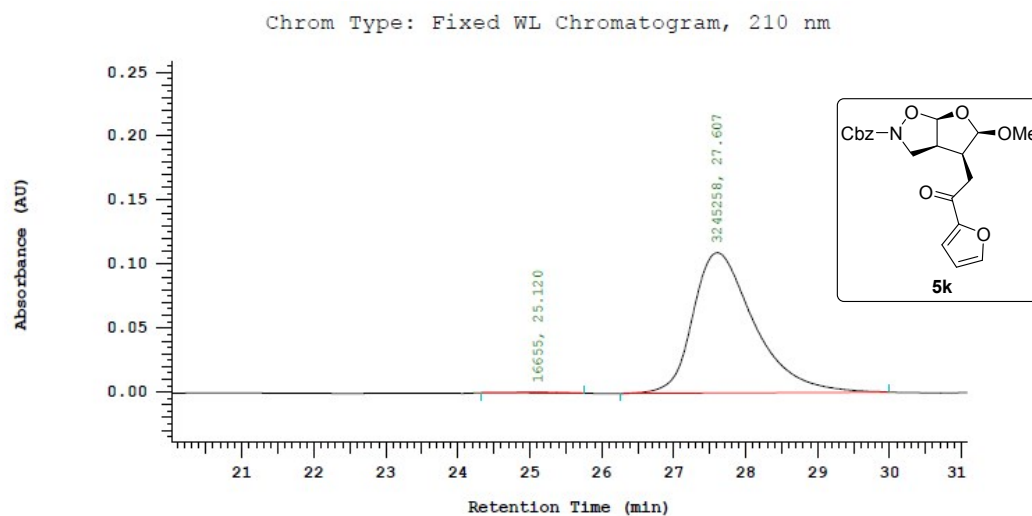

Chrom Type: Fixed WL Chromatogram, 210 nm

Peak Quantitation: AREA  
Calculation Method: AREA%

| No. | RT     | Area    | Area %  | BC |
|-----|--------|---------|---------|----|
| 1   | 25.120 | 16655   | 0.511   | BB |
| 2   | 27.607 | 3245258 | 99.489  | BB |
|     |        | 3261913 | 100.000 |    |

## The $^1\text{H}$ NMR spectrum of 5l (400 MHz, $\text{CDCl}_3$ )

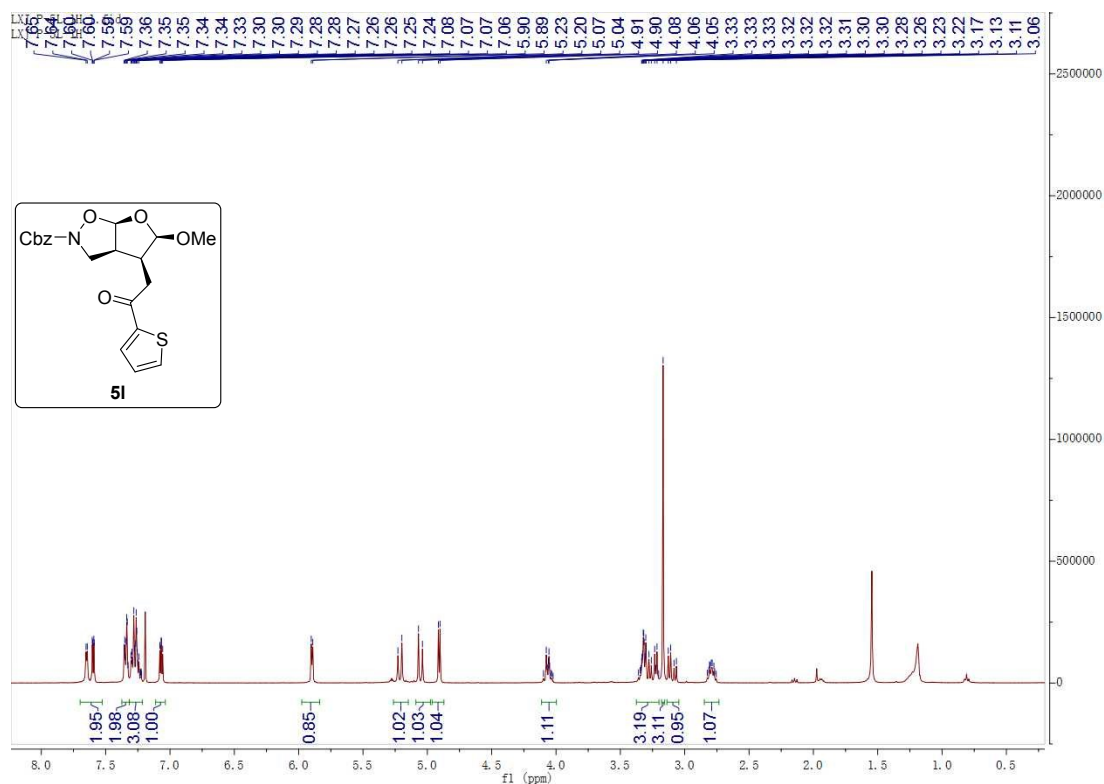

## The $^{13}\text{C}$ NMR spectrum of 5I (125 MHz, $\text{CDCl}_3$ )

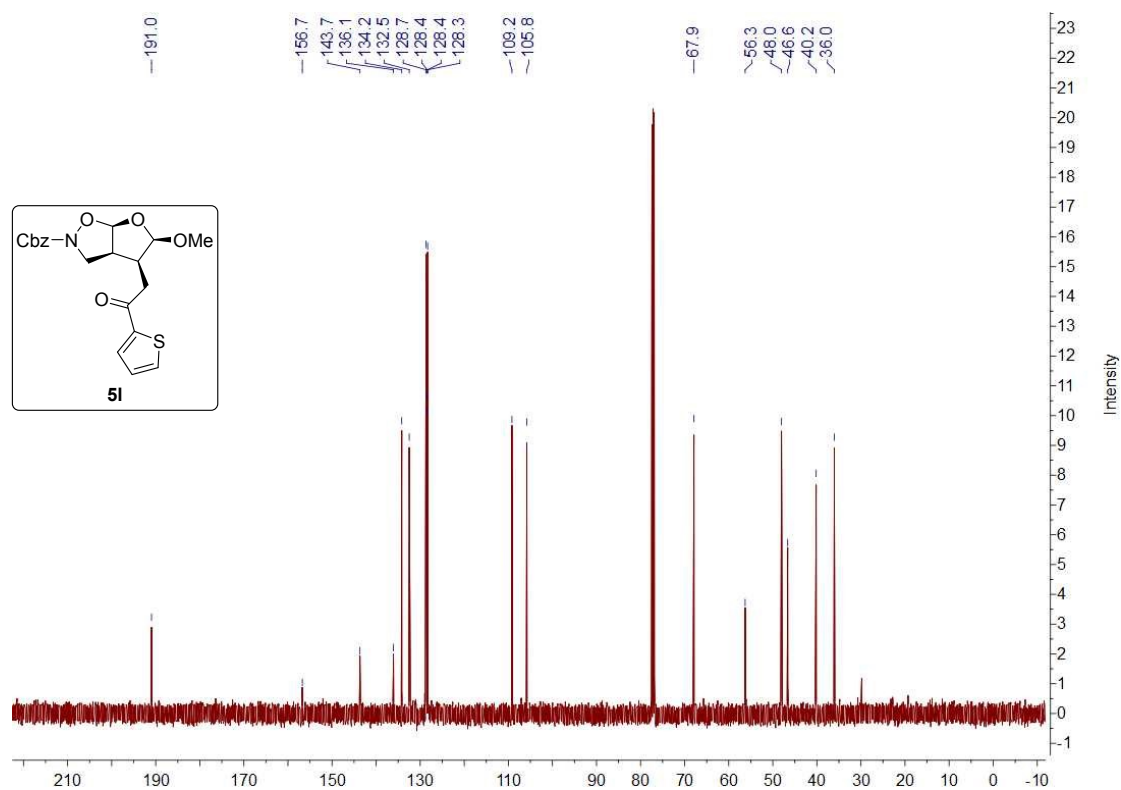

## The HPLC of racemic 5I

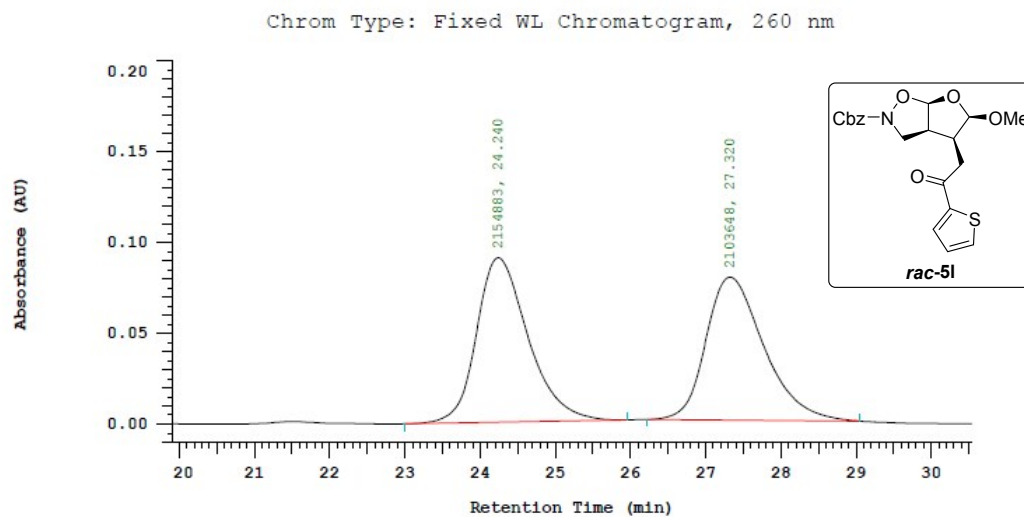

Chrom Type: Fixed WL Chromatogram, 260 nm  
 Peak Quantitation: AREA  
 Calculation Method: AREA%

| No. | RT     | Area    | Area %  | BC |
|-----|--------|---------|---------|----|
| 1   | 24.240 | 2154883 | 50.602  | BB |
| 2   | 27.320 | 2103648 | 49.398  | BB |
|     |        | 4258531 | 100.000 |    |

## The HPLC of chiral 5l

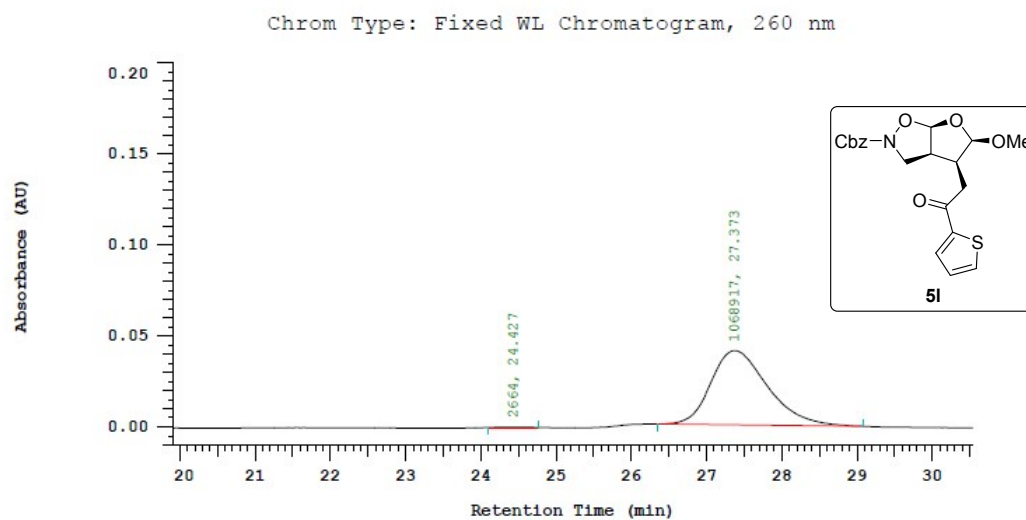

Chrom Type: Fixed WL Chromatogram, 260 nm

Peak Quantitation: AREA

Calculation Method: AREA%

| No. | RT     | Area    | Area %  | BC |
|-----|--------|---------|---------|----|
| 1   | 24.427 | 2664    | 0.249   | BB |
| 2   | 27.373 | 1068917 | 99.751  | BB |
|     |        | 1071581 | 100.000 |    |

## The <sup>1</sup>H NMR spectrum of 5m (500 MHz, CDCl<sub>3</sub>)

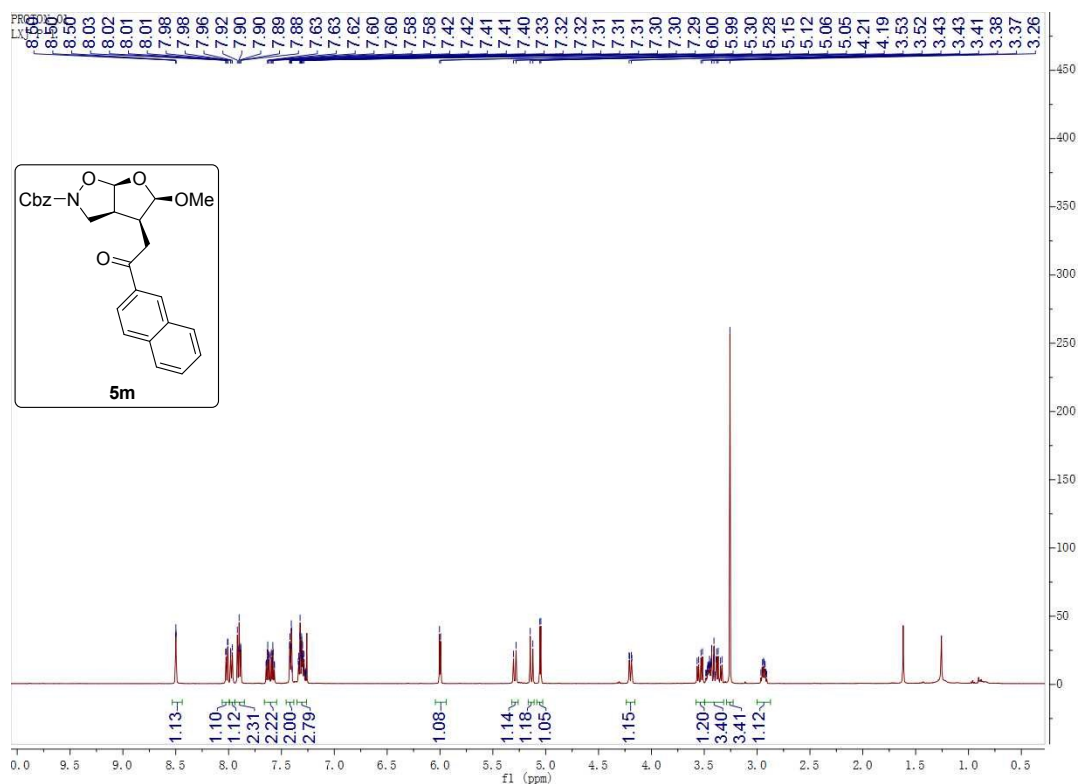

## The $^{13}\text{C}$ NMR spectrum of 5m (125 MHz, $\text{CDCl}_3$ )

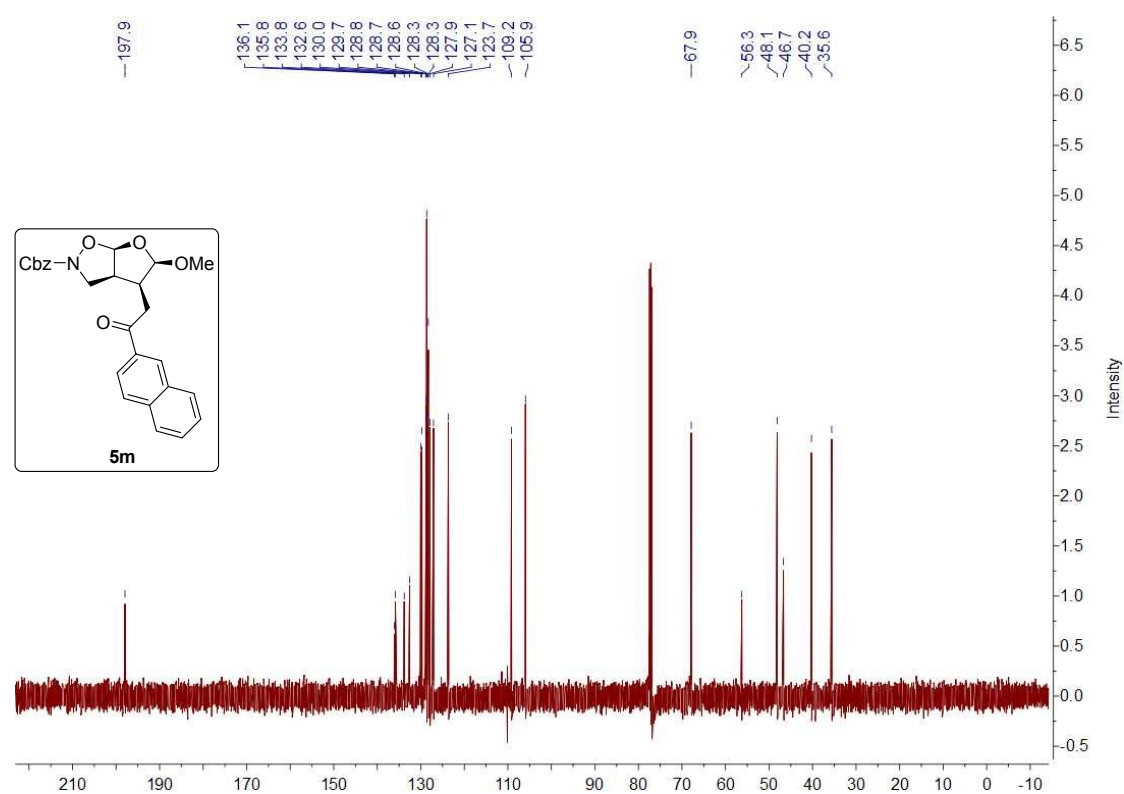

## The HPLC of racemic 5m

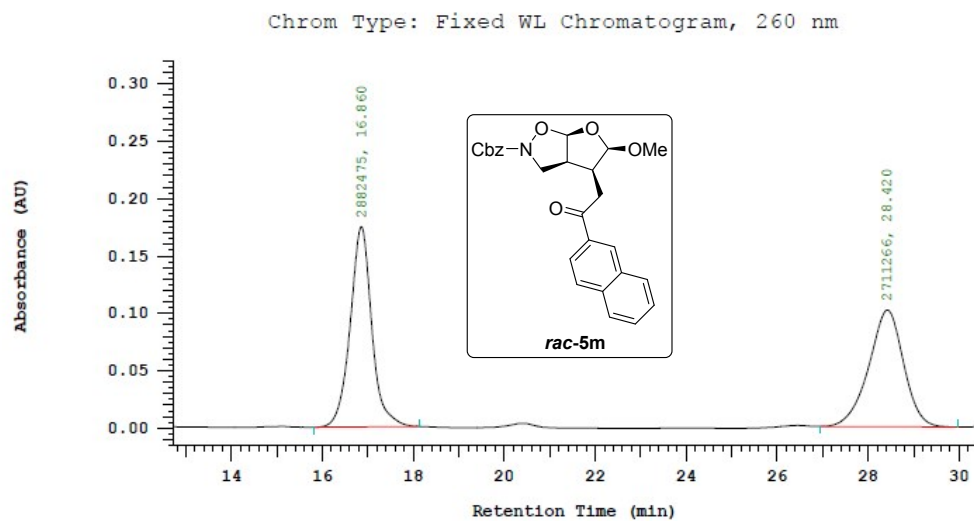

Chrom Type: Fixed WL Chromatogram, 260 nm  
Peak Quantitation: AREA  
Calculation Method: AREA%

| No. | RT     | Area    | Area %  | BC |
|-----|--------|---------|---------|----|
| 1   | 16.860 | 2882475 | 51.530  | BB |
| 2   | 28.420 | 2711266 | 48.470  | BB |
|     |        | 5593741 | 100.000 |    |



## The HPLC of chiral 5m

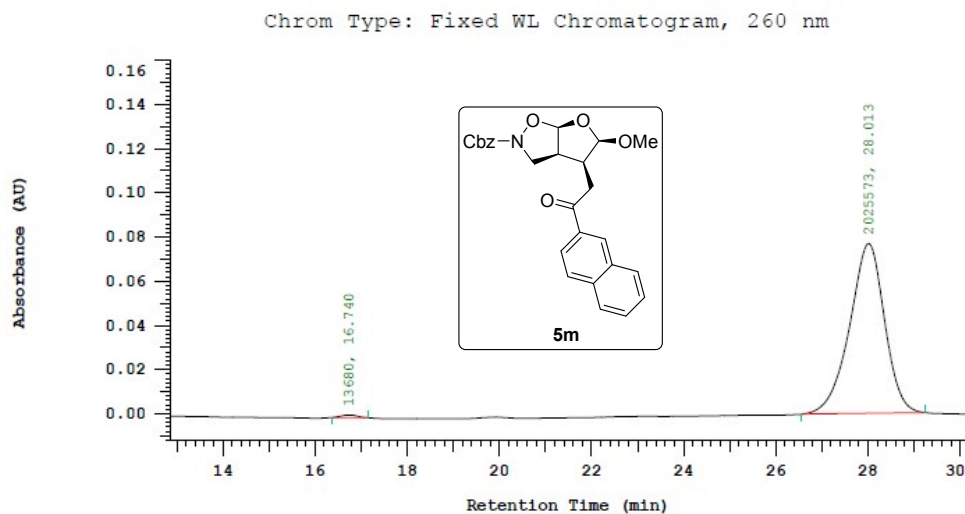

Chrom Type: Fixed WL Chromatogram, 260 nm

Peak Quantitation: AREA

Calculation Method: AREA%

| No. | RT     | Area    | Area %  | BC |
|-----|--------|---------|---------|----|
| 1   | 16.740 | 13680   | 0.671   | BB |
| 2   | 28.013 | 2025573 | 99.329  | BB |
|     |        | 2039253 | 100.000 |    |

## The $^1\text{H}$ NMR spectrum of 5n (500 MHz, $\text{CDCl}_3$ )

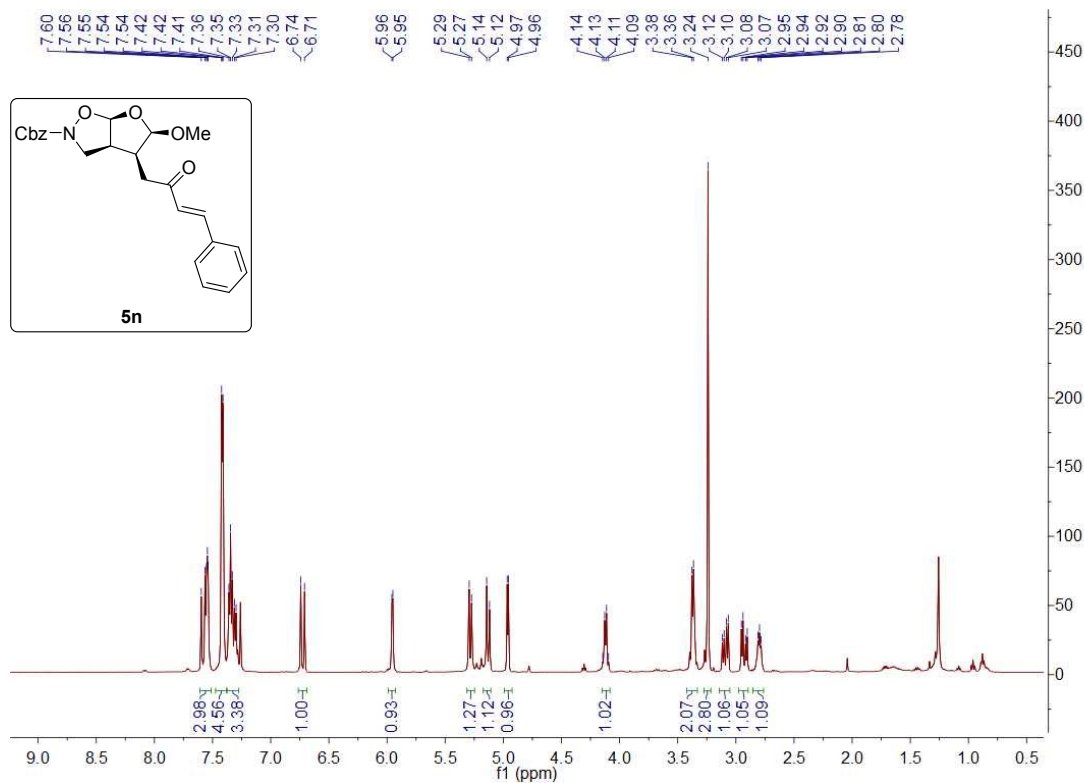



### The $^{13}\text{C}$ NMR spectrum of 5n (125 MHz, $\text{CDCl}_3$ )

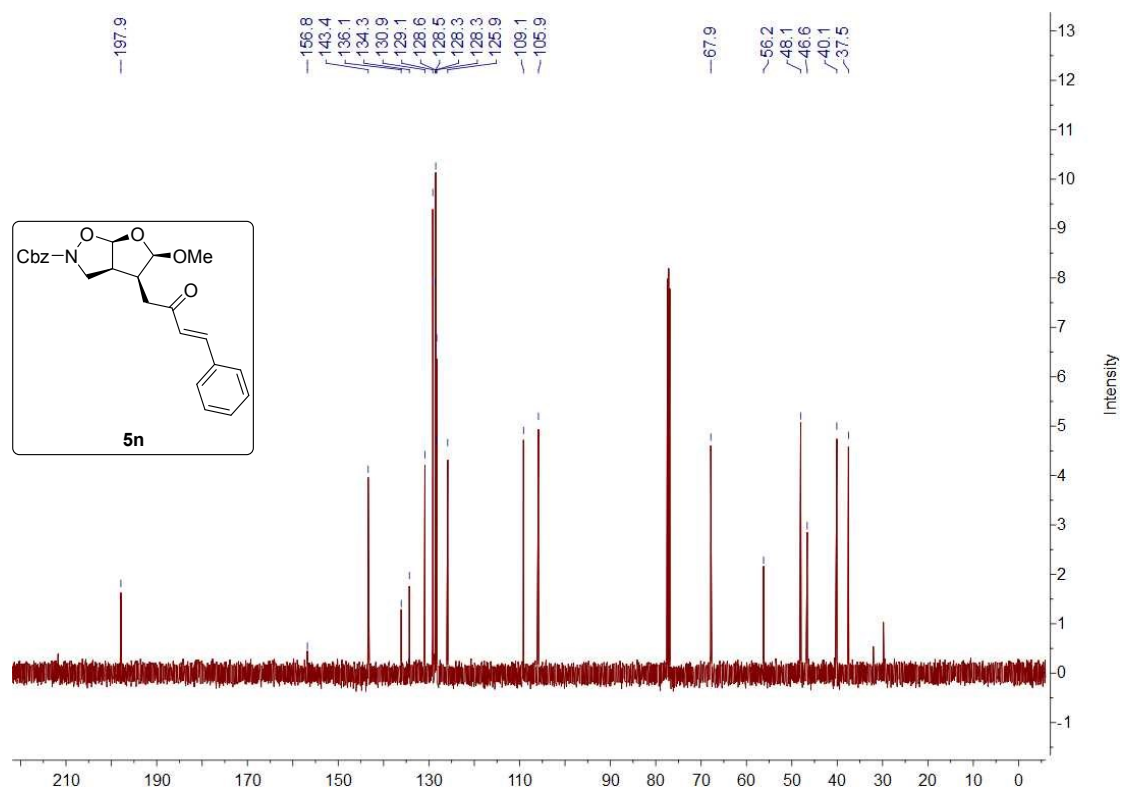

### The HPLC of racemic 5n

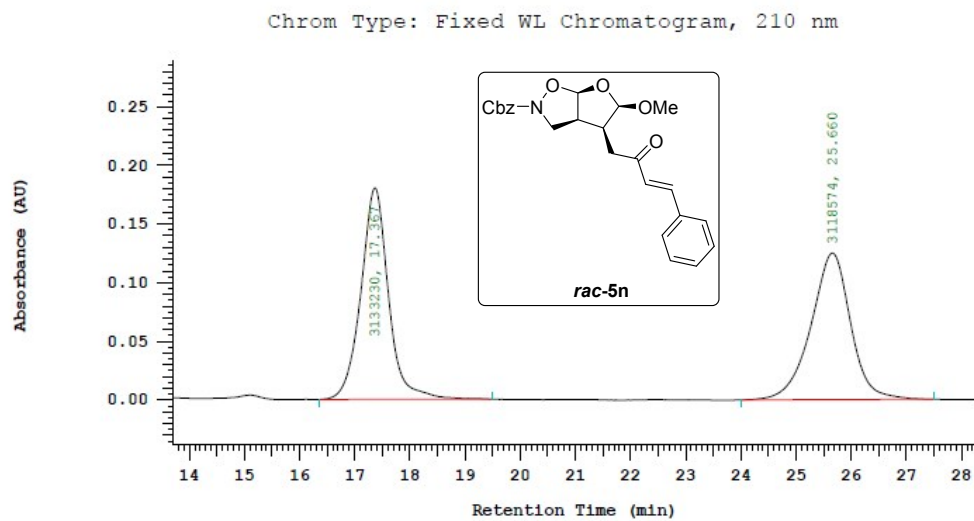

Chrom Type: Fixed WL Chromatogram, 210 nm  
 Peak Quantitation: AREA  
 Calculation Method: AREA%

| No. | RT     | Area    | Area %  | BC |
|-----|--------|---------|---------|----|
| 1   | 17.367 | 3133230 | 50.117  | BB |
| 2   | 25.660 | 3118574 | 49.883  | BB |
|     |        | 6251804 | 100.000 |    |

## The HPLC of chiral 5n

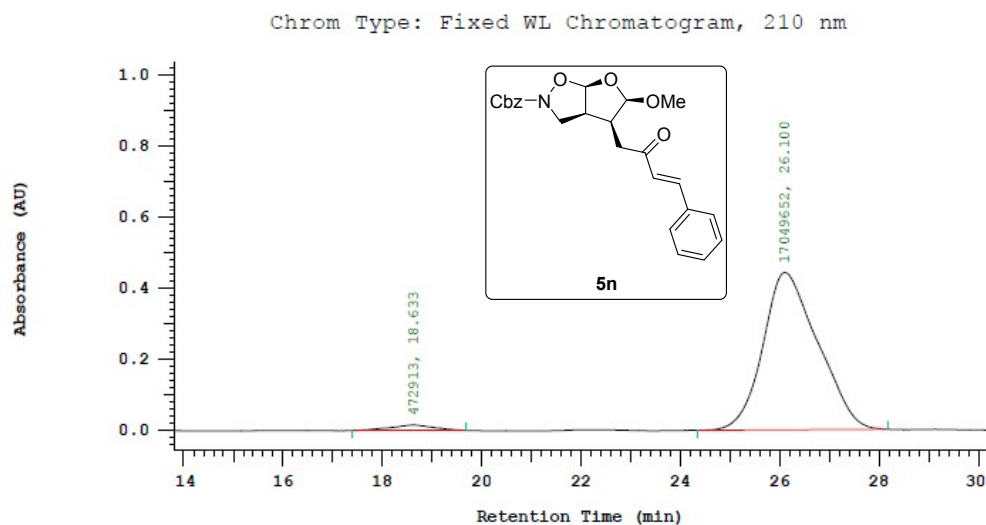

Chrom Type: Fixed WL Chromatogram, 210 nm

Peak Quantitation: AREA

Calculation Method: AREA%

| No. | RT     | Area     | Area %  | BC |
|-----|--------|----------|---------|----|
| 1   | 18.633 | 472913   | 2.699   | BB |
| 2   | 26.100 | 17049652 | 97.301  | BB |
|     |        | 17522565 | 100.000 |    |

## The <sup>1</sup>H NMR spectrum of 5o (500 MHz, CDCl<sub>3</sub>)

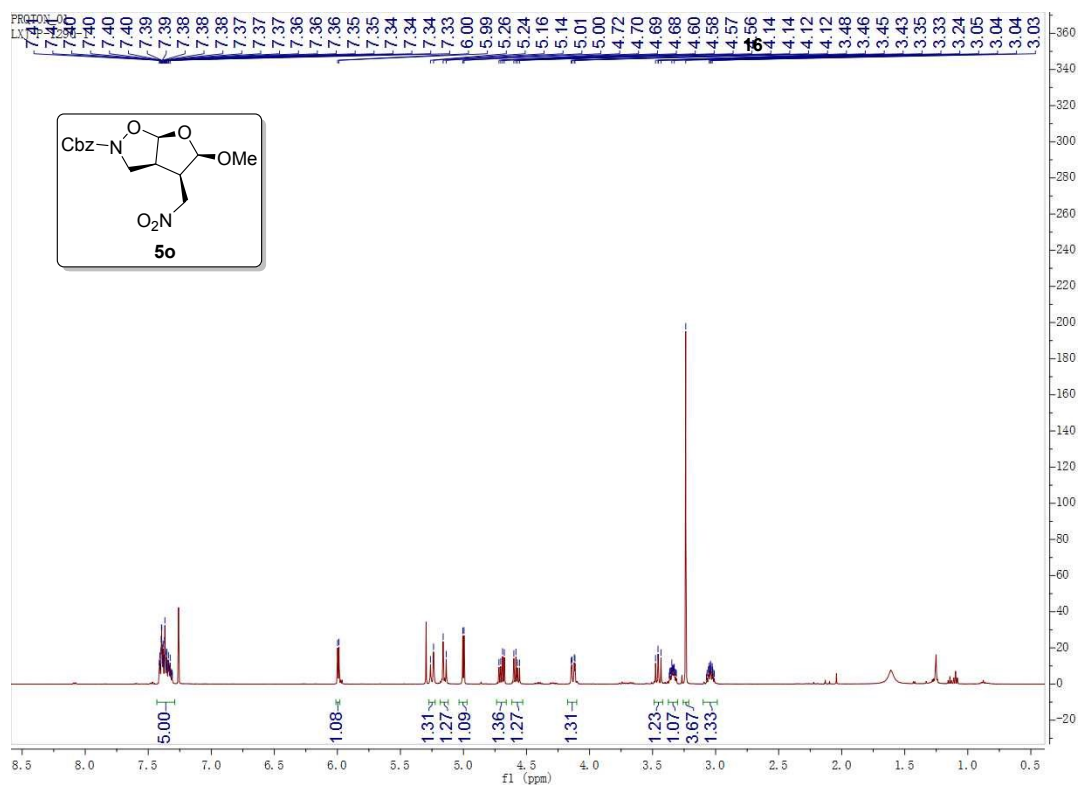

## The $^{13}\text{C}$ NMR spectrum of 5o (125 MHz, $\text{CDCl}_3$ )

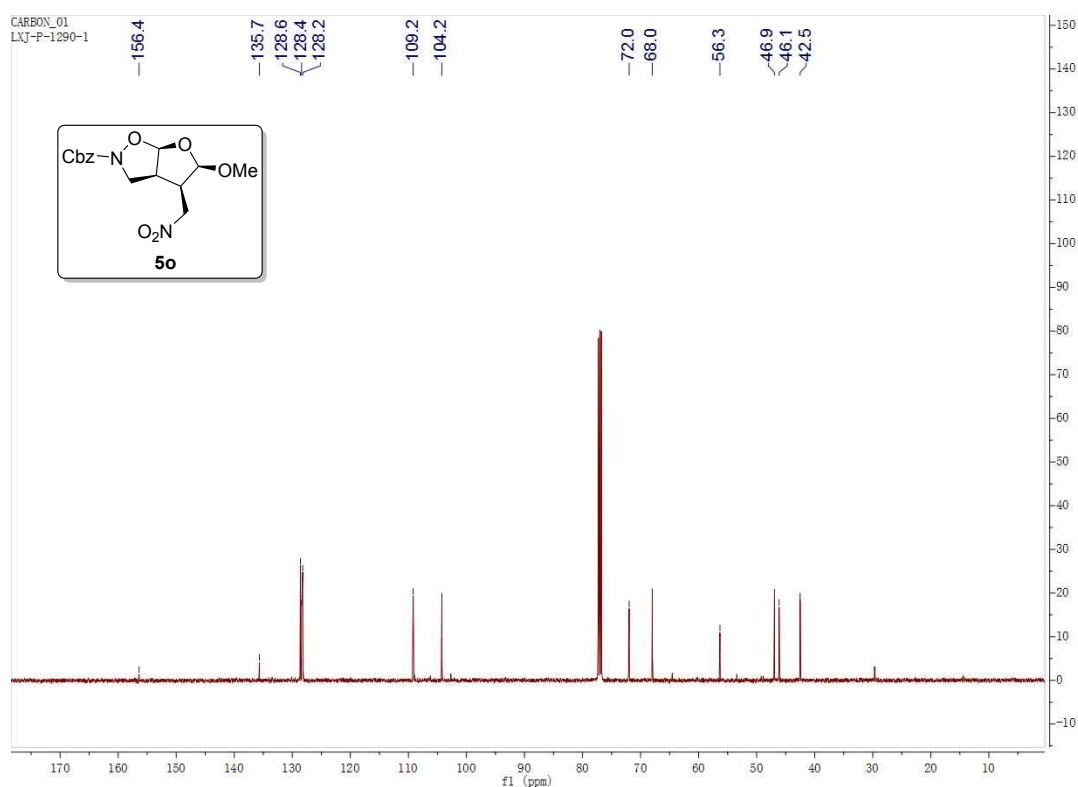

## The HPLC of racemic 5o

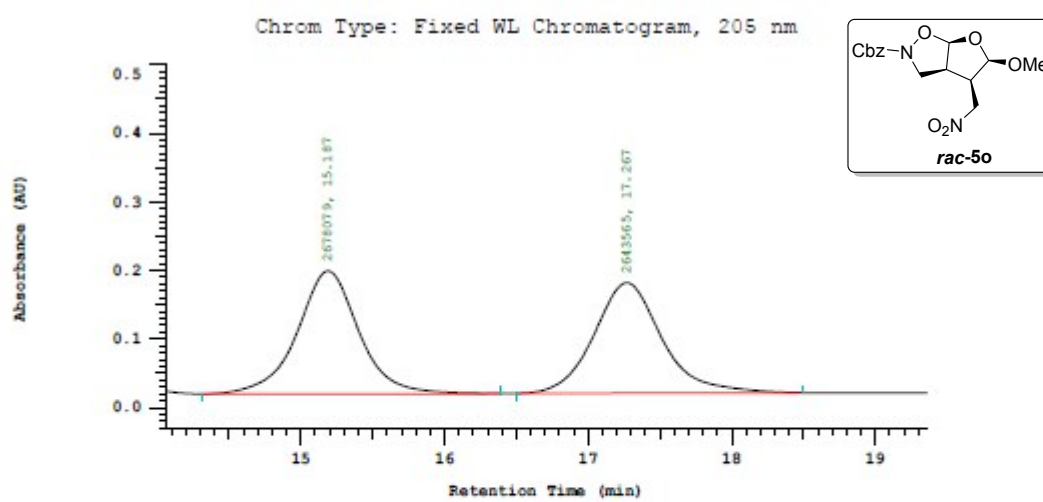

Chrom Type: Fixed WL Chromatogram, 205 nm  
Peak Quantitation: AREA  
Calculation Method: AREA%

| No. | RT     | Area    | Area %  | BC |
|-----|--------|---------|---------|----|
| 1   | 15.187 | 2678079 | 50.324  | BB |
| 2   | 17.267 | 2643565 | 49.676  | BB |
|     |        | 5321644 | 100.000 |    |

## The HPLC of chiral 5o

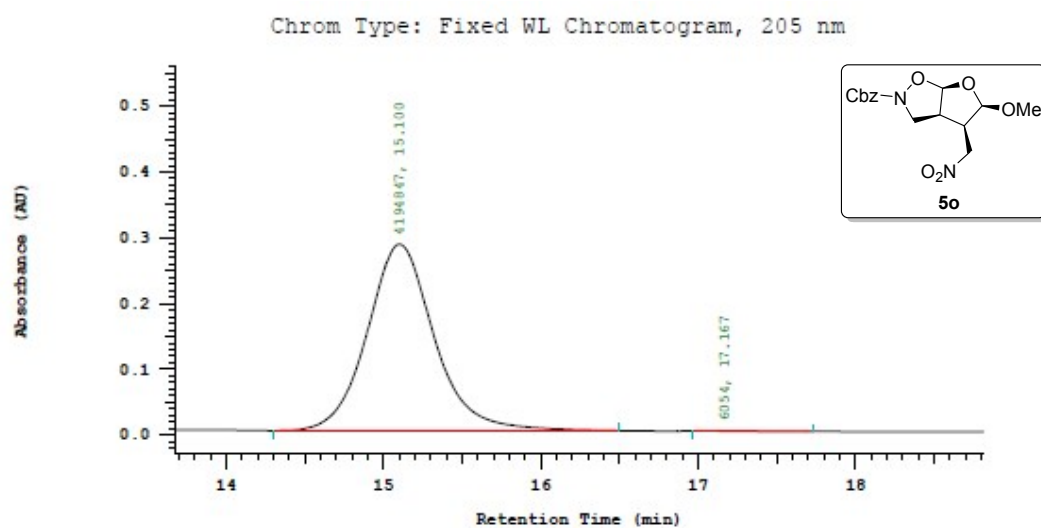

Chrom Type: Fixed WL Chromatogram, 205 nm

Peak Quantitation: AREA

Calculation Method: AREA%

| No. | RT     | Area    | Area %  | BC |
|-----|--------|---------|---------|----|
| 1   | 15.100 | 4194847 | 99.856  | BB |
| 2   | 17.167 | 6054    | 0.144   | BB |
|     |        | 4200901 | 100.000 |    |

## The <sup>1</sup>H NMR spectrum of 7 (500 MHz, CDCl<sub>3</sub>)

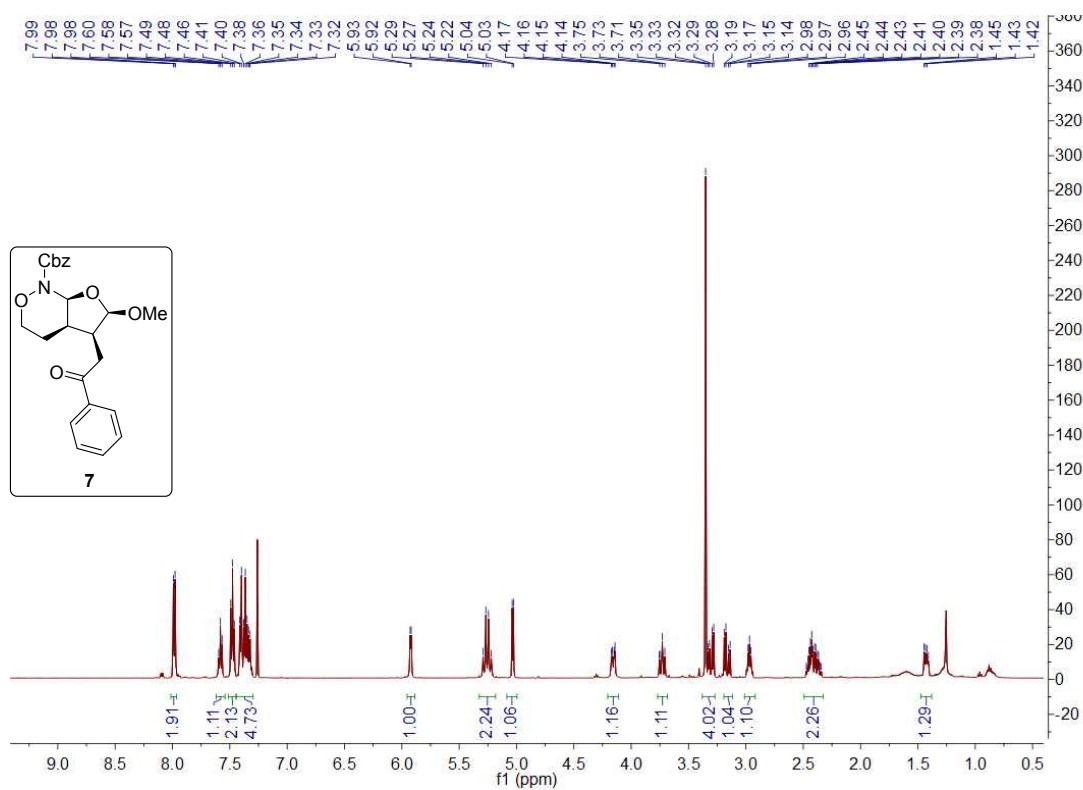

The  $^{13}\text{C}$  NMR spectrum of **7** (125 MHz,  $\text{CDCl}_3$ )

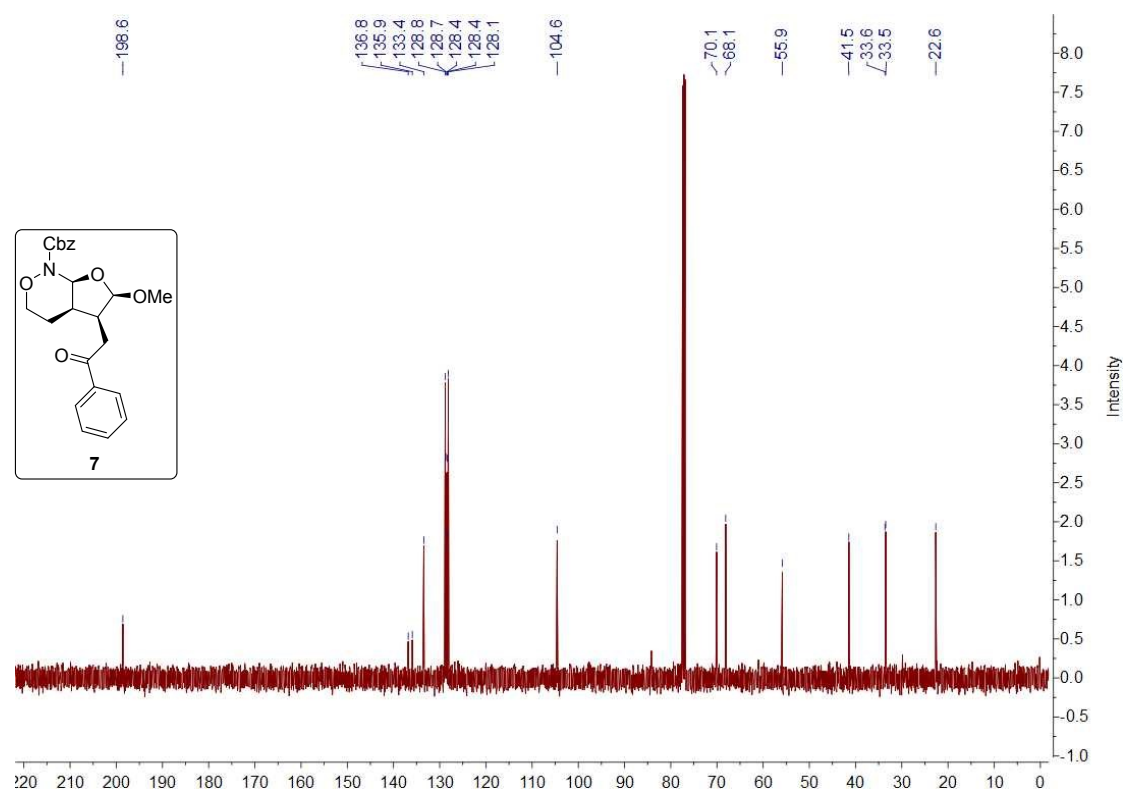

The NOESY spectrum of **7** (400 MHz,  $\text{CDCl}_3$ )

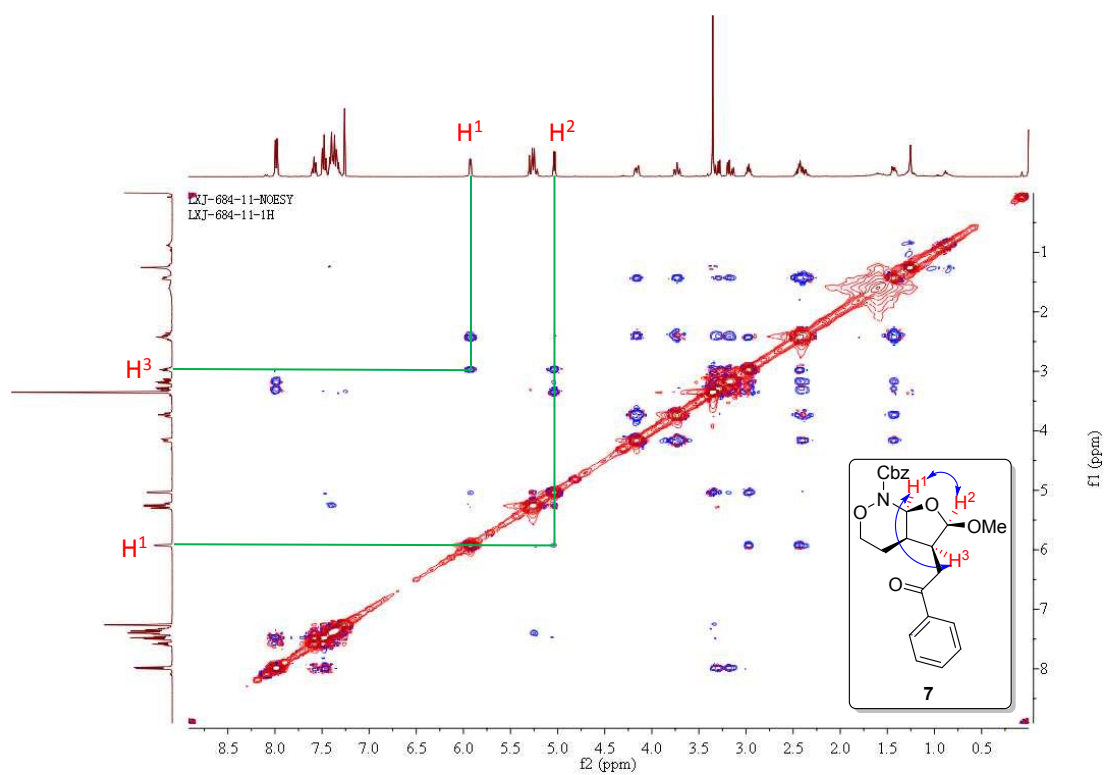

## The HPLC of racemic 7

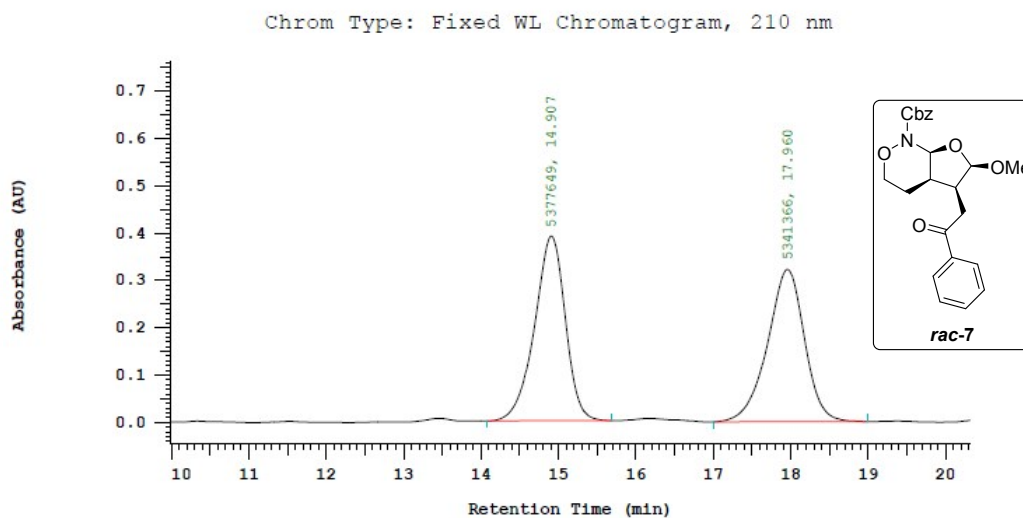

Chrom Type: Fixed WL Chromatogram, 210 nm  
Peak Quantitation: AREA  
Calculation Method: AREA%

| No. | RT     | Area     | Area %  | BC |
|-----|--------|----------|---------|----|
| 1   | 14.907 | 5377649  | 50.169  | BB |
| 2   | 17.960 | 5341366  | 49.831  | BB |
|     |        | 10719015 | 100.000 |    |

## The HPLC of chiral 7

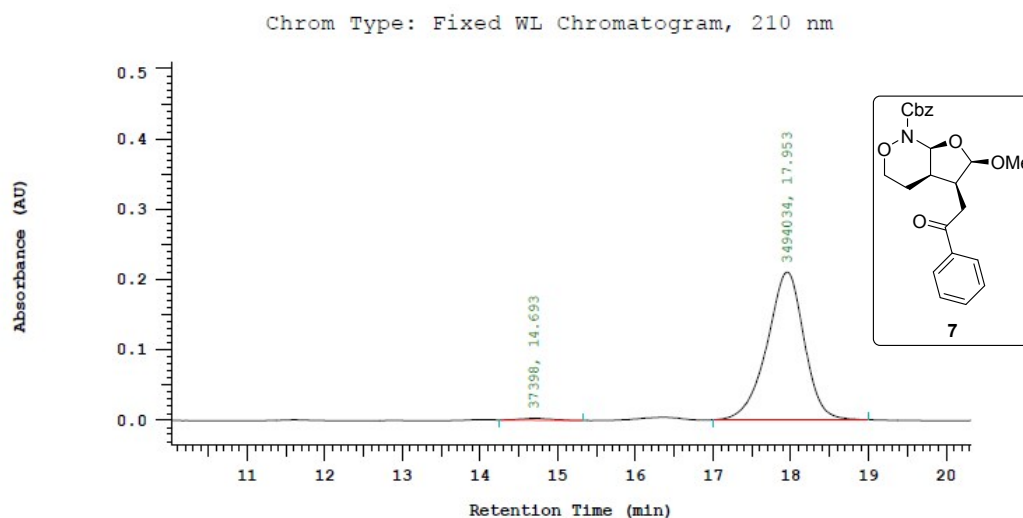

Chrom Type: Fixed WL Chromatogram, 210 nm  
Peak Quantitation: AREA  
Calculation Method: AREA%

| No. | RT     | Area    | Area %  | BC |
|-----|--------|---------|---------|----|
| 1   | 14.693 | 37398   | 1.059   | BB |
| 2   | 17.953 | 3494034 | 98.941  | BB |
|     |        | 3531432 | 100.000 |    |

**The  $^1\text{H}$  NMR spectrum of 7' (500 MHz,  $\text{CDCl}_3$ )**

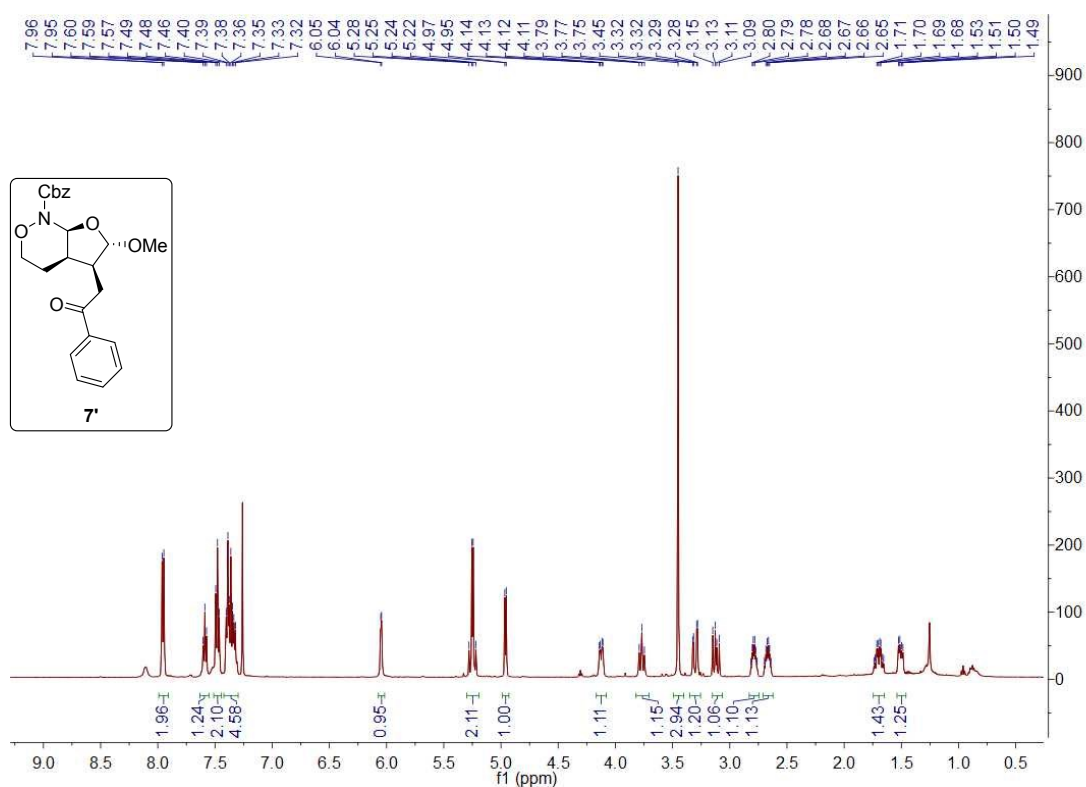

**The  $^{13}\text{C}$  NMR spectrum of 7' (125 MHz,  $\text{CDCl}_3$ )**

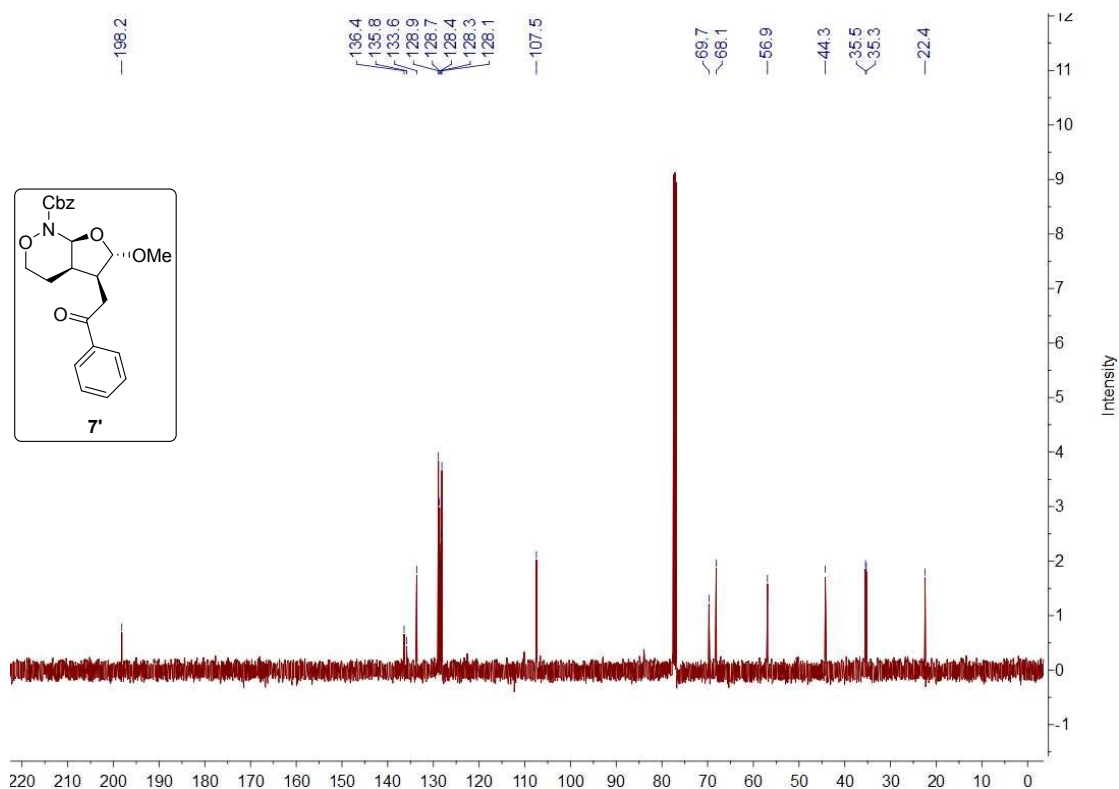



## The NOESY spectrum of 7' (400 MHz, CDCl<sub>3</sub>)

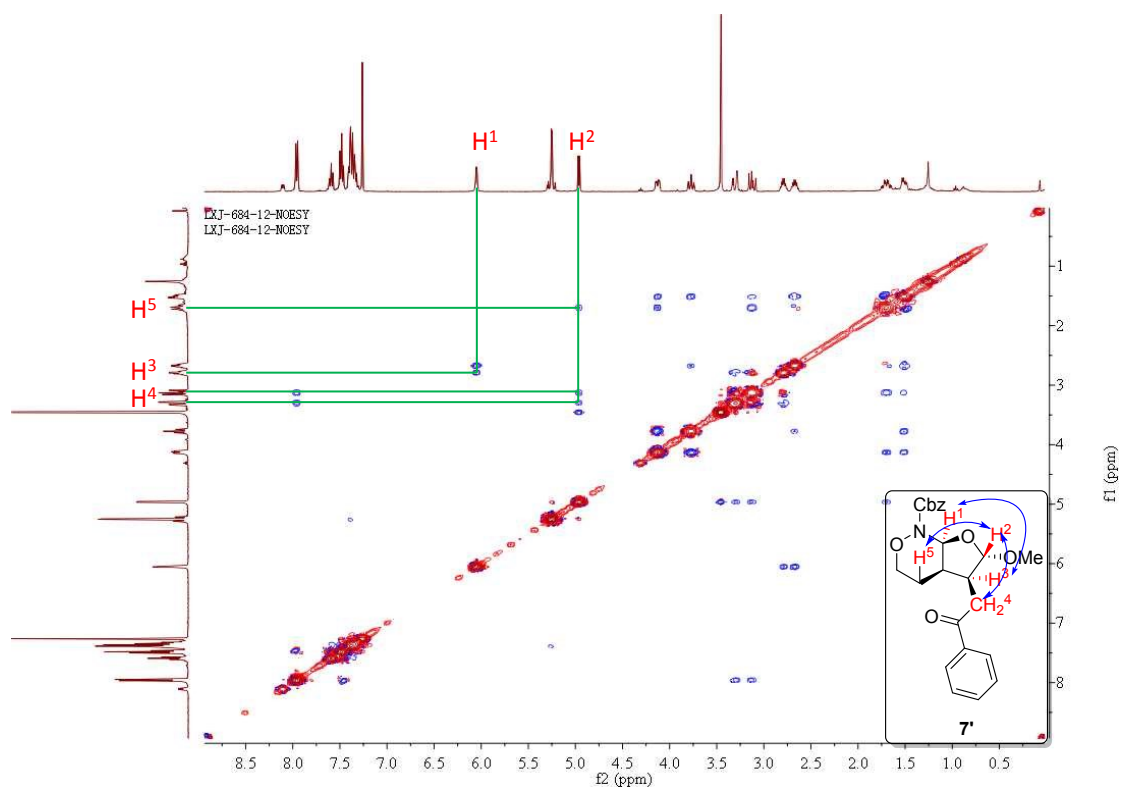

## The HPLC of racemic 7'

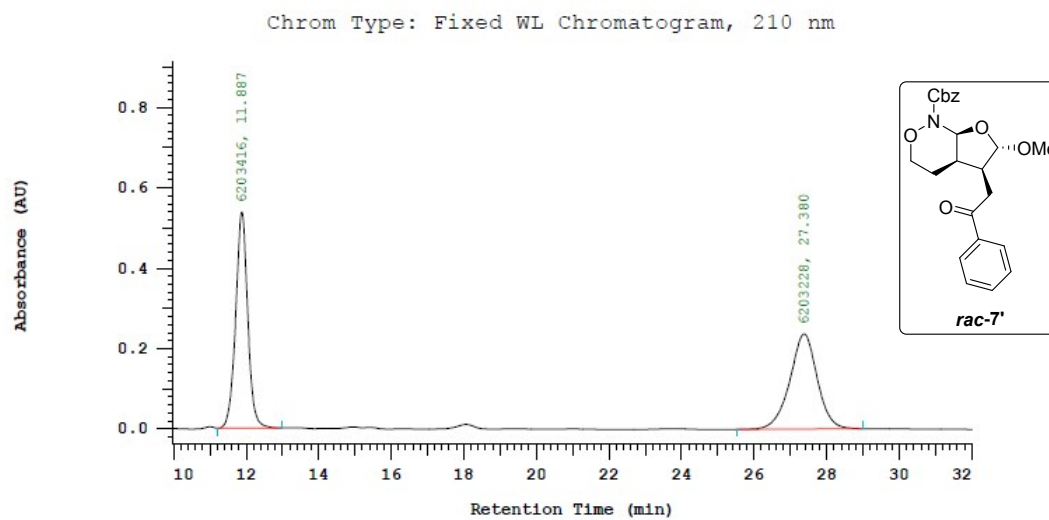

Chrom Type: Fixed WL Chromatogram, 210 nm  
 Peak Quantitation: AREA  
 Calculation Method: AREA%

| No. | RT     | Area     | Area %  | BC |
|-----|--------|----------|---------|----|
| 1   | 11.887 | 6203416  | 50.001  | BB |
| 2   | 27.380 | 6203228  | 49.999  | BB |
|     |        | 12406644 | 100.000 |    |



## The HPLC of chiral 7'

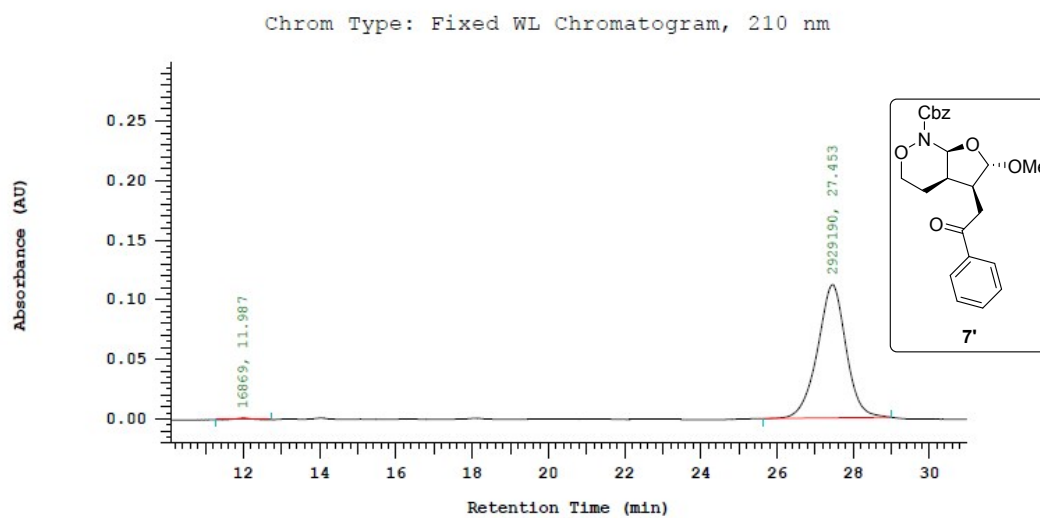

Chrom Type: Fixed WL Chromatogram, 210 nm

Peak Quantitation: AREA  
Calculation Method: AREA%

| No. | RT     | Area    | Area %  | BC |
|-----|--------|---------|---------|----|
| 1   | 11.987 | 16869   | 0.573   | BB |
| 2   | 27.453 | 2929190 | 99.427  | BB |
|     |        | 2946059 | 100.000 |    |

## The $^1\text{H}$ NMR spectrum of 8 (500 MHz, $\text{CDCl}_3$ )

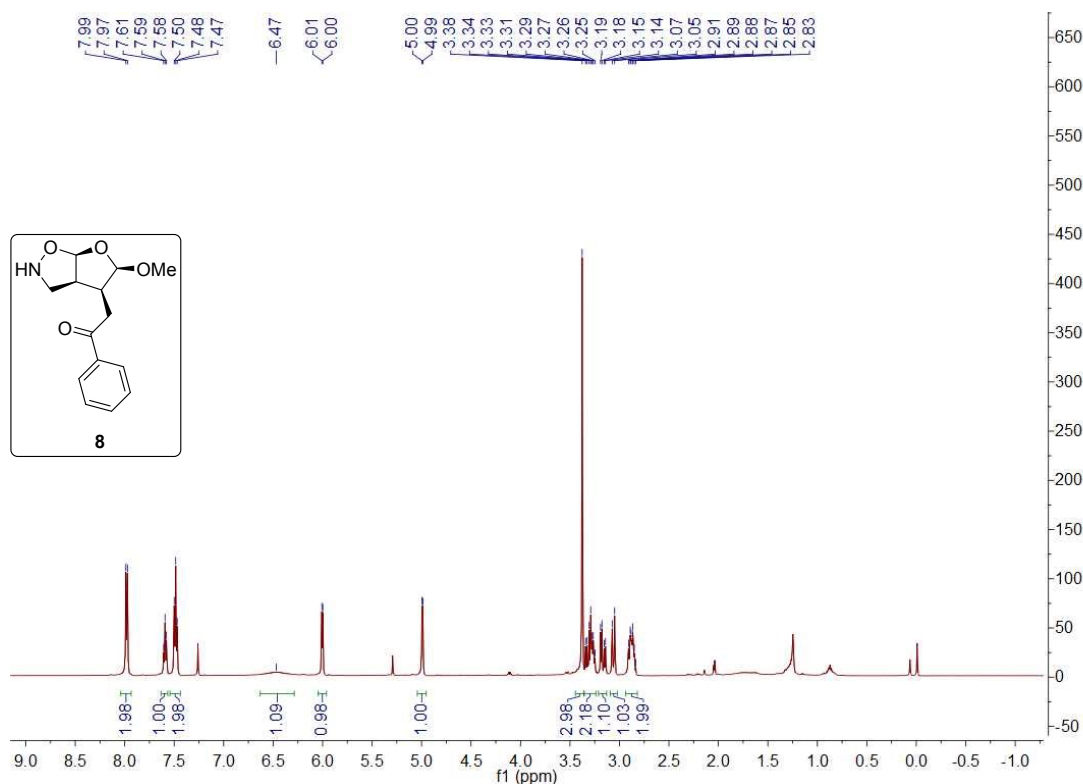

### The $^{13}\text{C}$ NMR spectrum of **8** (125 MHz, $\text{CDCl}_3$ )

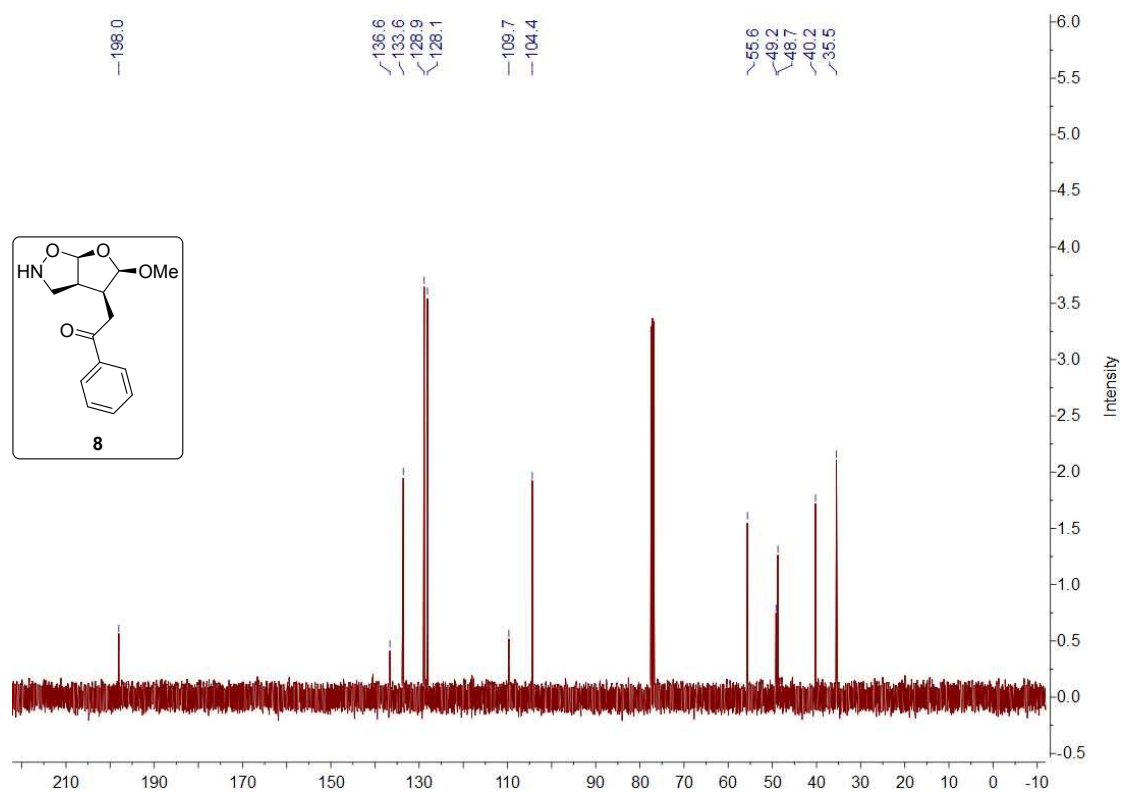

### The HPLC of racemic **8**

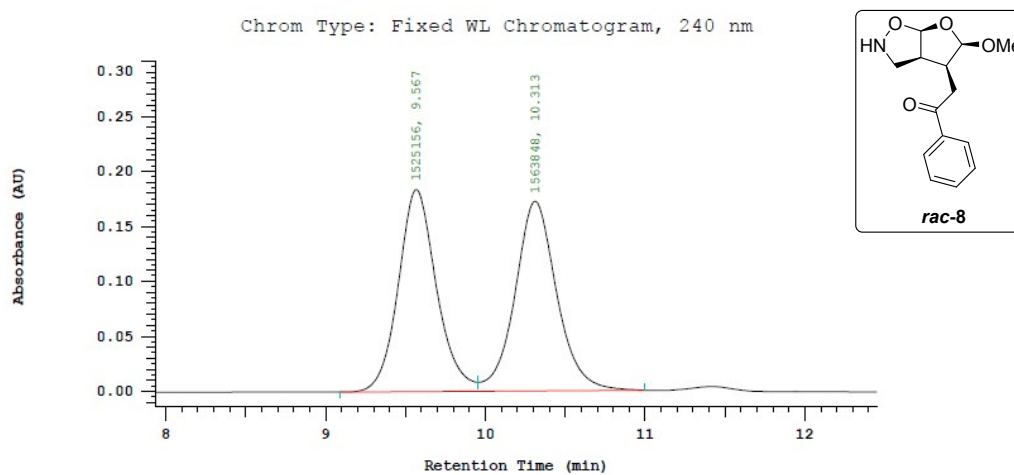

Chrom Type: Fixed WL Chromatogram, 240 nm  
 Peak Quantitation: AREA  
 Calculation Method: AREA%

| No. | RT     | Area    | Area %  | BC |
|-----|--------|---------|---------|----|
| 1   | 9.567  | 1525156 | 49.374  | BV |
| 2   | 10.313 | 1563848 | 50.626  | VB |
|     |        | 3089004 | 100.000 |    |

## The HPLC of chiral 8

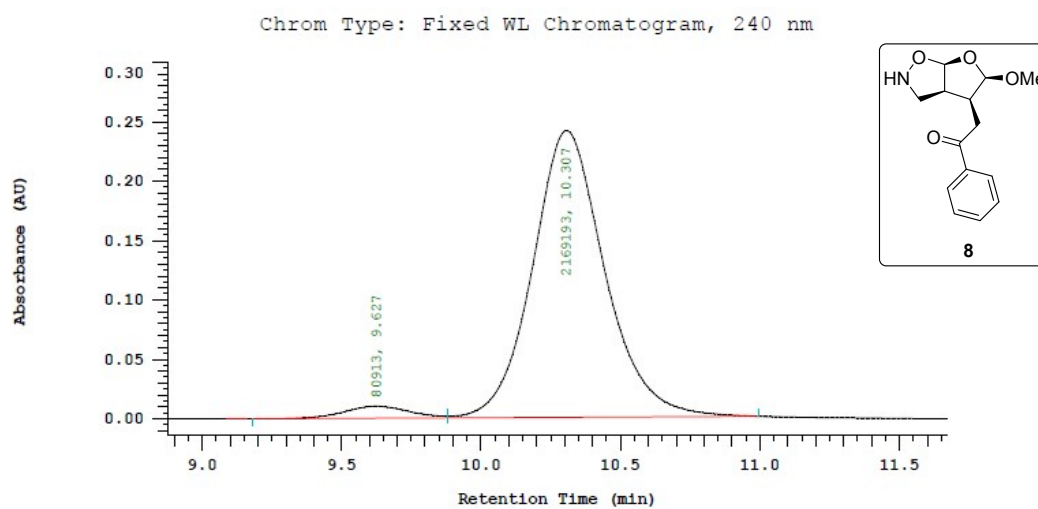

Chrom Type: Fixed WL Chromatogram, 240 nm  
Peak Quantitation: AREA  
Calculation Method: AREA%

| No. | RT     | Area    | Area %  | BC |
|-----|--------|---------|---------|----|
| 1   | 9.627  | 80913   | 3.596   | BV |
| 2   | 10.307 | 2169193 | 96.404  | VB |
|     |        | 2250106 | 100.000 |    |

## The <sup>1</sup>H NMR spectrum of 9 (500 MHz, CDCl<sub>3</sub>)

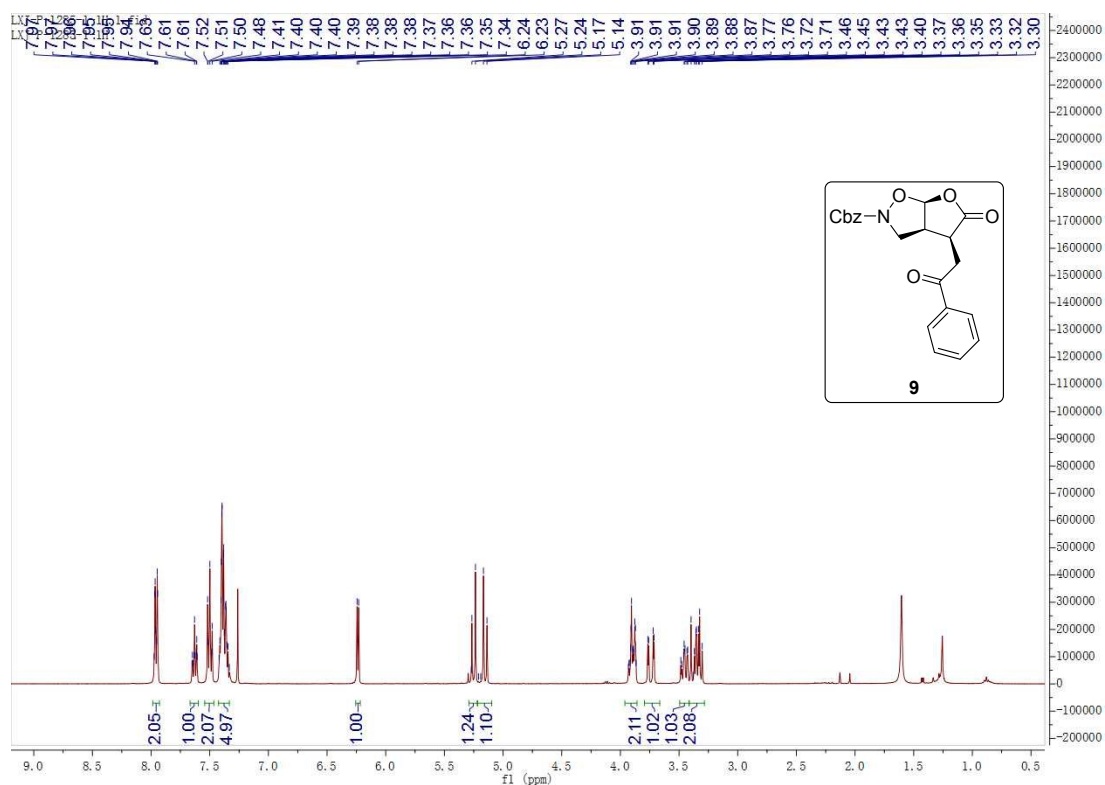

### The $^{13}\text{C}$ NMR spectrum of **9** (125 MHz, $\text{CDCl}_3$ )

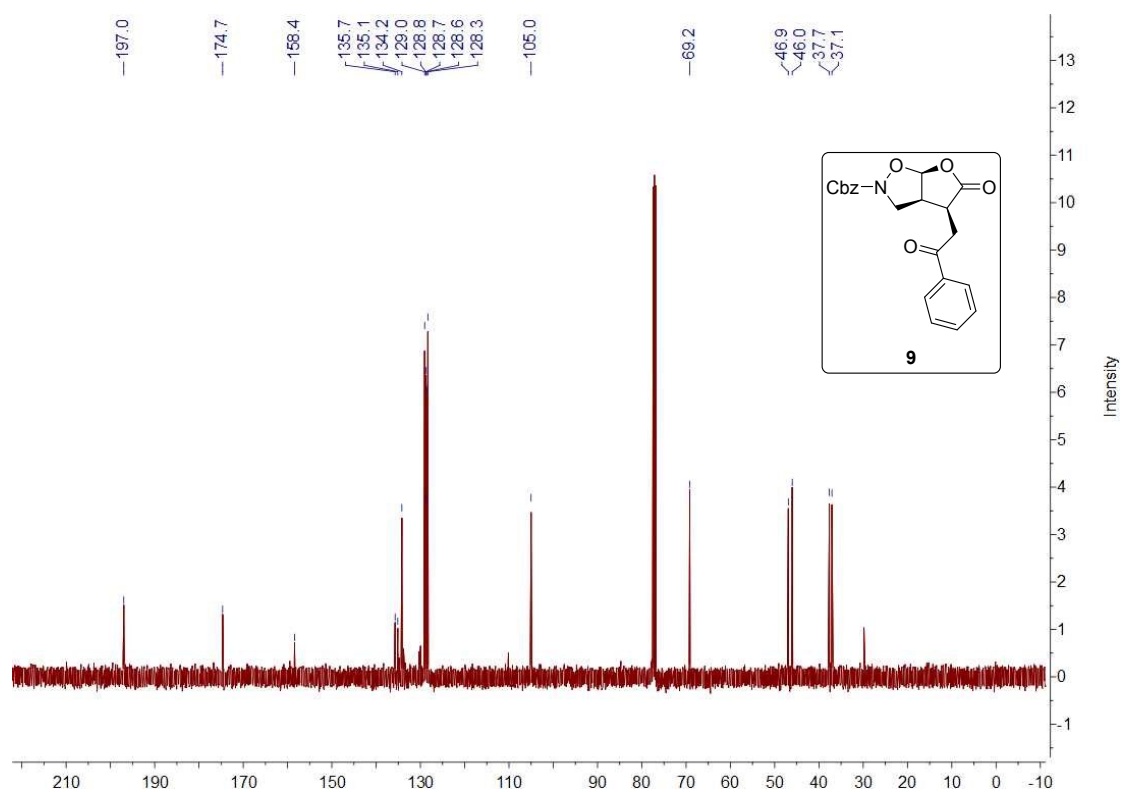

### The HPLC of racemic **9**

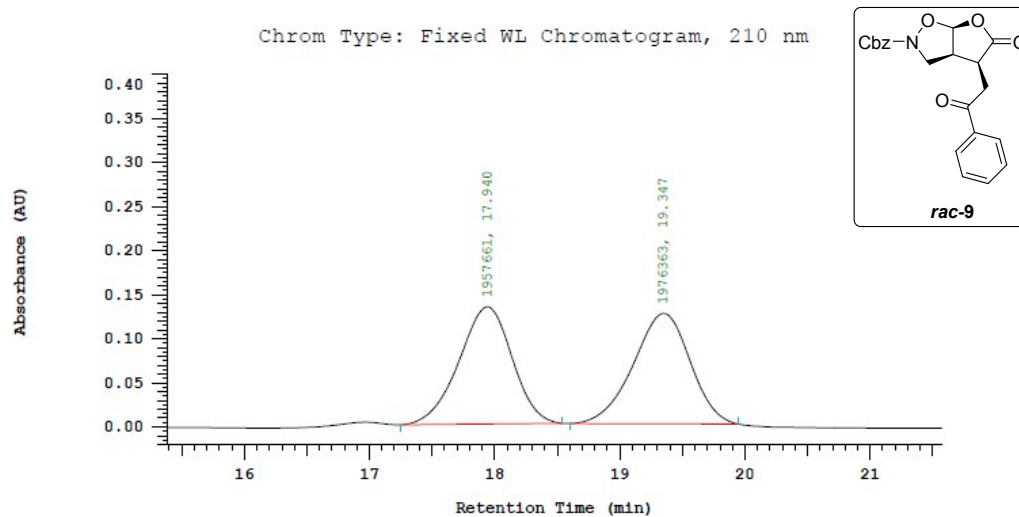

Chrom Type: Fixed WL Chromatogram, 210 nm  
 Peak Quantitation: AREA  
 Calculation Method: AREA%

| No. | RT     | Area    | Area %  | BC |
|-----|--------|---------|---------|----|
| 1   | 17.940 | 1957661 | 49.762  | BB |
| 2   | 19.347 | 1976363 | 50.238  | BB |
|     |        | 3934024 | 100.000 |    |

## The HPLC of chiral 9 in transformation

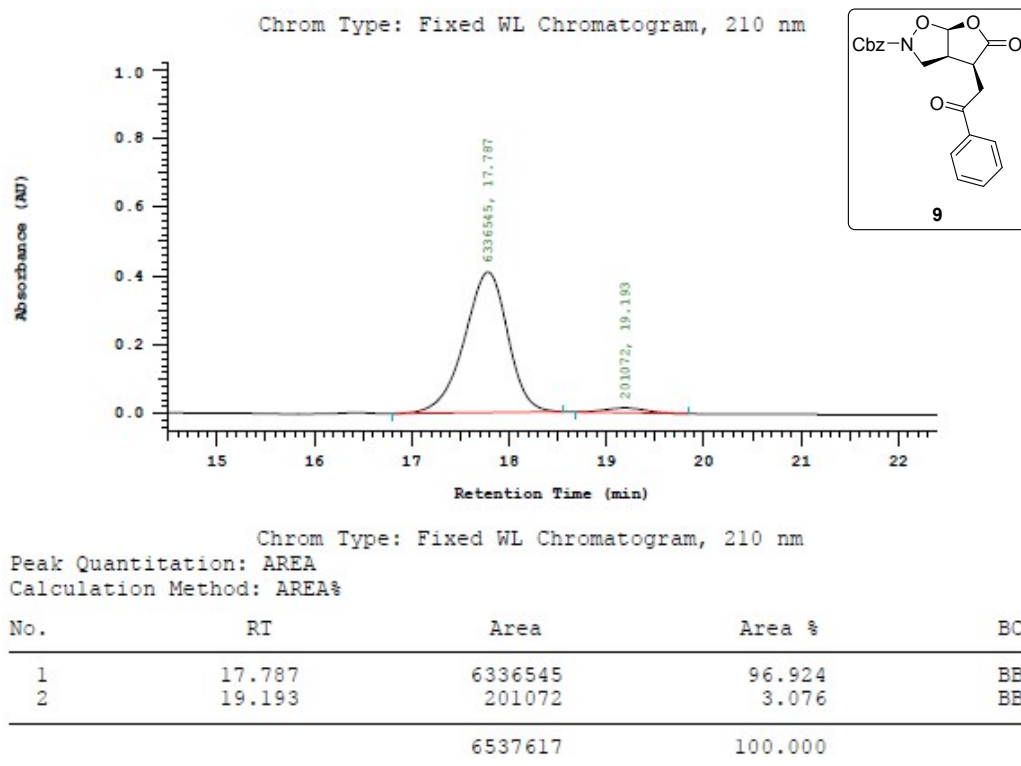

## The HPLC of chiral 9 in other reactions

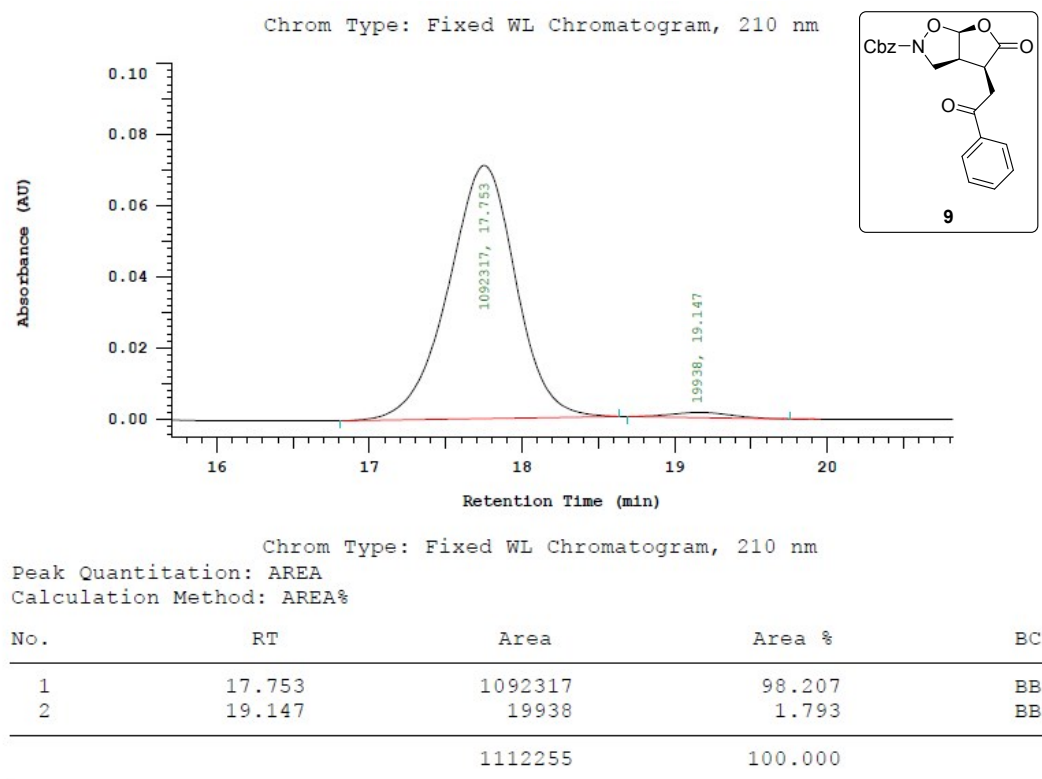

**The  $^1\text{H}$  NMR spectrum of 10 (400 MHz,  $\text{CDCl}_3$ )**

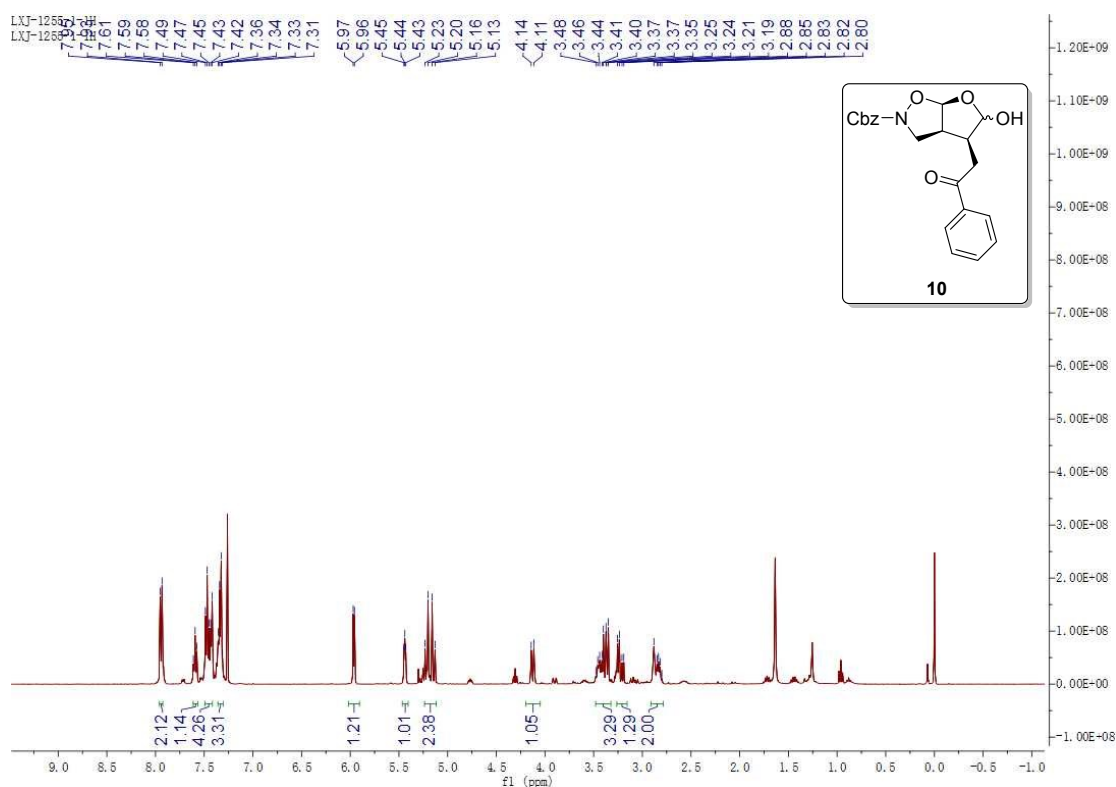

**The  $^{13}\text{C}$  NMR spectrum of 10 (100 MHz,  $\text{CDCl}_3$ )**

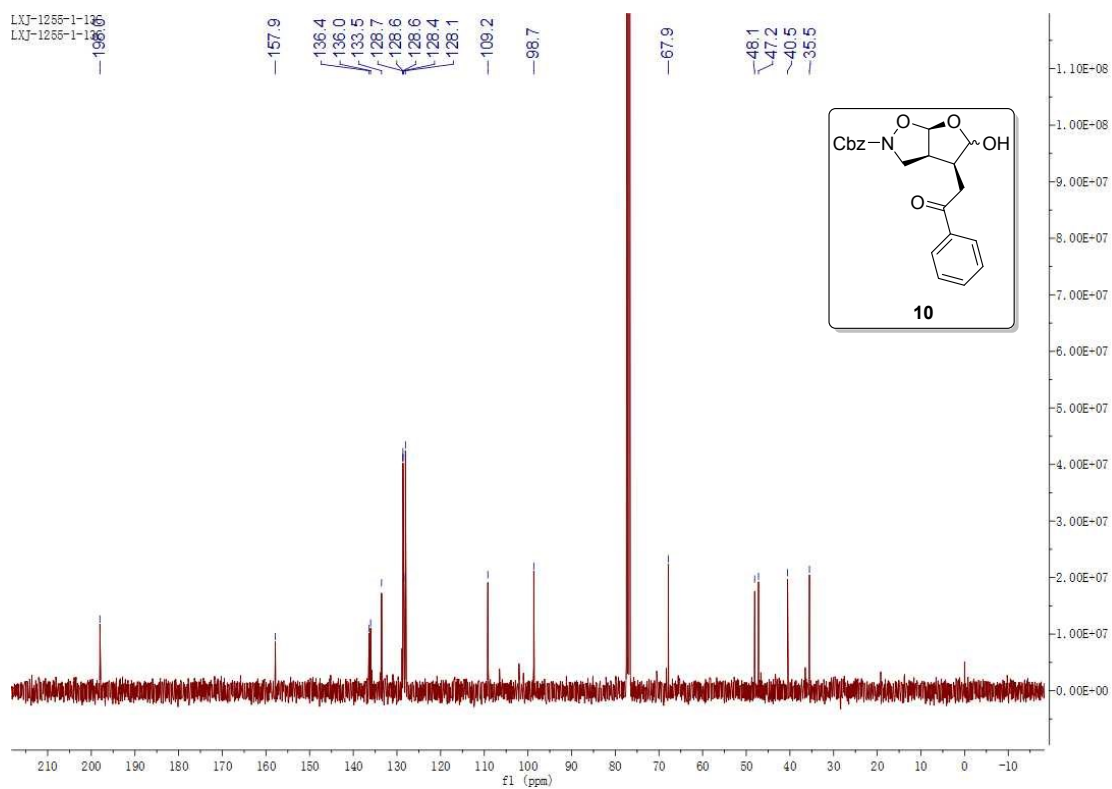

**The  $^1\text{H}$  NMR spectrum of 17 (400 MHz,  $\text{CDCl}_3$ )**

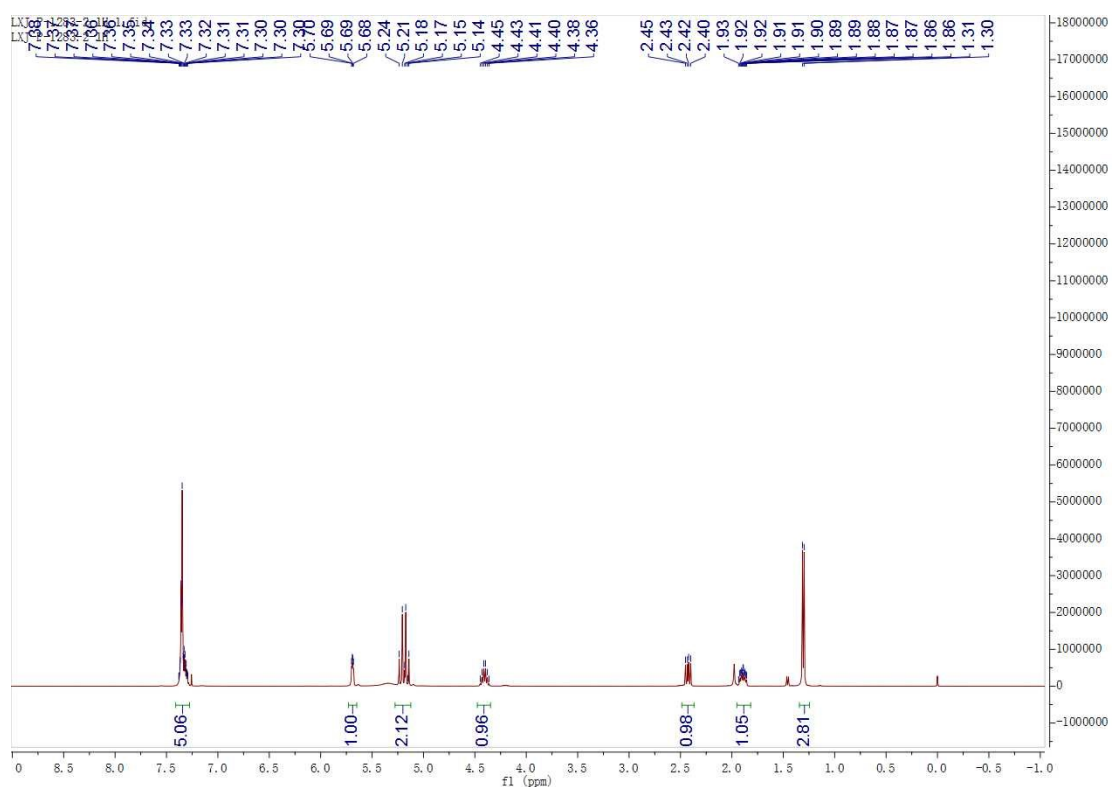

**The  $^{13}\text{C}$  NMR spectrum of 17 (100 MHz,  $\text{CDCl}_3$ )**

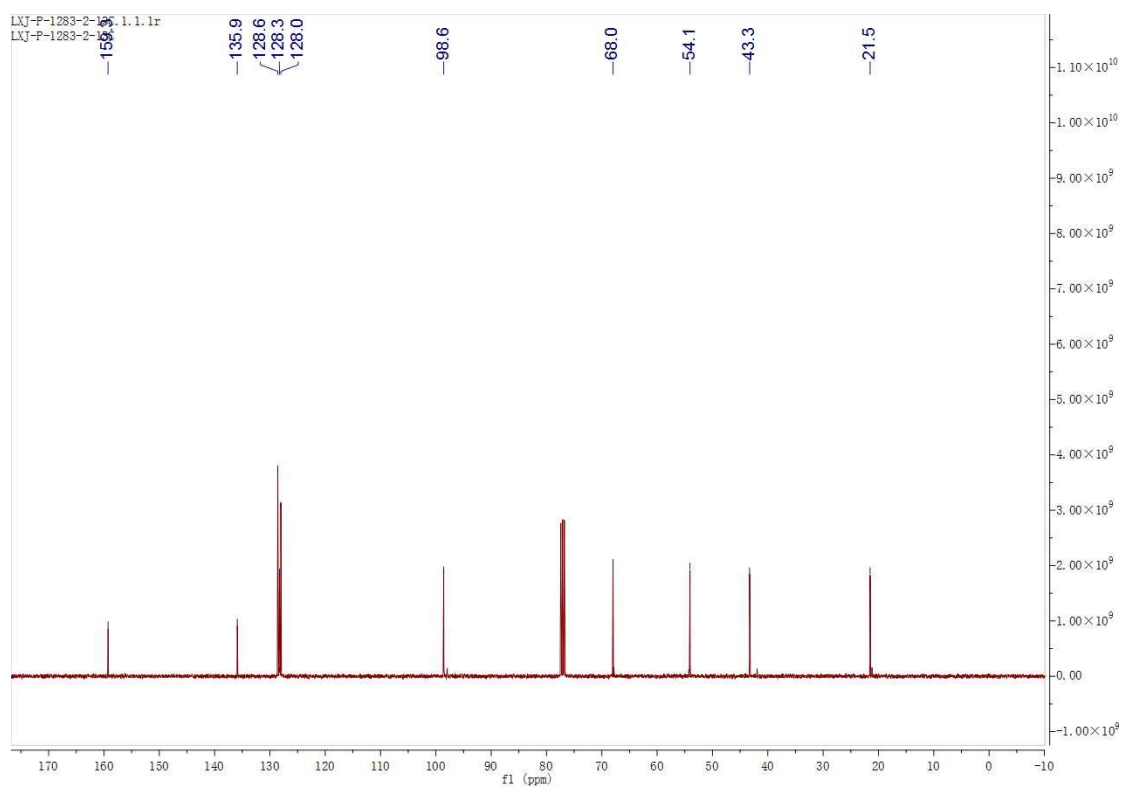



## L. Single crystal X-Ray diffraction data

[CCDC 1968770 contain the supplementary crystallographic data for this paper. These data can be obtained free of charge from The Cambridge Crystallographic Data Centre via [www.ccdc.cam.ac.uk/data\\_request/cif](http://www.ccdc.cam.ac.uk/data_request/cif).]

### Absolute configuration of **5b** - CCDC 1968770

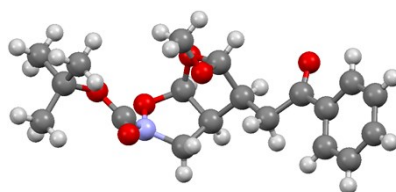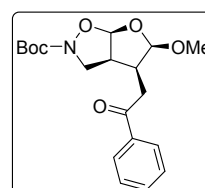

---

|                                                                                       |                            |                                                               |
|---------------------------------------------------------------------------------------|----------------------------|---------------------------------------------------------------|
| Bond precision:                                                                       | C-C = 0.0044 Å             | Wavelength=0.71073                                            |
| Cell:                                                                                 | a=10.9242 (19)<br>alpha=90 | b=7.1718 (13)<br>beta=105.167 (3)<br>c=12.651 (2)<br>gamma=90 |
| Temperature:                                                                          | 296 K                      |                                                               |
| Volume                                                                                | Calculated<br>956.6 (3)    | Reported<br>956.6 (3)                                         |
| Space group                                                                           | P 21                       | P 1 21 1                                                      |
| Hall group                                                                            | P 2yb                      | P 2yb                                                         |
| Moiety formula                                                                        | C19 H25 N O6               | C19 H25 N O6                                                  |
| Sum formula                                                                           | C19 H25 N O6               | C19 H25 N O6                                                  |
| Mr                                                                                    | 363.40                     | 363.40                                                        |
| Dx, g cm <sup>-3</sup>                                                                | 1.262                      | 1.262                                                         |
| Z                                                                                     | 2                          | 2                                                             |
| Mu (mm <sup>-1</sup> )                                                                | 0.094                      | 0.094                                                         |
| F000                                                                                  | 388.0                      | 388.0                                                         |
| F000'                                                                                 | 388.21                     |                                                               |
| h,k,lmax                                                                              | 14, 9, 16                  | 14, 9, 16                                                     |
| Nref                                                                                  | 4406 [ 2381]               | 3910                                                          |
| Tmin, Tmax                                                                            |                            | 0.694, 0.746                                                  |
| Tmin'                                                                                 |                            |                                                               |
| Correction method= # Reported T Limits: Tmin=0.694 Tmax=0.746<br>AbsCorr = MULTI-SCAN |                            |                                                               |
| Data completeness=                                                                    | 1.64/0.89                  | Theta (max)= 27.521                                           |
| R(reflections)=                                                                       | 0.0406 ( 3117)             | wR2(reflections)= 0.0893 ( 3910)                              |
| S =                                                                                   | 1.034                      | Npar= 240                                                     |

---
